# Supplementary material for: Identification of common genetic variants that account for transcript isoform variation between human populations
Source: Springer Nature journal article supplement (doi:10.1007/s00439-008-0601-x), 2008-12-03
Supplement: MOESM1 [file 439_2008_601_MOESM1_ESM.xls]

## Sheet: Supplemental TableS3
Supplemental Table S3. Primers used in the validation of differentially spliced probesets.
Label a	Affymetrix Probeset ID	Forward	Reverse
MPHOSPH9_EOI	3476020	AGTTTGCCTTTTCTGACTGC	CCTTGGAAGATCGTTTGGAA
MPHOSPH9_HKE		ATTCCCCTGTGGAGTGACTG	GAGAAAGCCACCGATAACCA
MRPL43_EOI	3303658	AGTGTCTTGTCACTTCTGGAGCTT	TCAGTTCAGTCATCCGATCTTC
MRPL43_HKE		GGTATTCGGCCACTACTCTGG	GTGGAGCGGGAGGTGAT
MTMR4_EOI	3764493	TCTTCTCTGACTGCGTGCTC	TTCACATTCACAGCCTCCAC
MTMR4_HKE		CCAACTGTGAGGTCGTGTTC	GCTAGGATCCGGCATCTG
PARP2	3527423	GTTGATGACGTCAGCGTTC	CTTCCCCACCTTGGGTGTA
a: EOI (Exon of Interest), HKE (Flanking, Housekeeping Exon)

## Sheet: Supplemental Table S2
Supplemental Table S2. Associated SNPs with the differentially spliced probesets.
Affymetrix TC ID	Affymetrix PS ID	PS Position	Gene Symbol	Entrez ID	SNP	SNP Position	SNP-Gene Symbol	P	Mode	Fst
2396537	2396584	chr1:11127612-11127666	FRAP1	2475	rs2273348	chr1:11001663	TARDBP	3e-11	local	0.57607
2396537	2396584	chr1:11127612-11127666	FRAP1	2475	rs1474891	chr1:11004466	TARDBP	1e-10	local	0.57607
2396537	2396584	chr1:11127612-11127666	FRAP1	2475	rs11583653	chr1:11016790	MASP2	2e-09	local	0.54793
2396537	2396584	chr1:11127612-11127666	FRAP1	2475	rs12136082	chr1:11024861	MASP2	2e-08	local	0.0112892
2396537	2396584	chr1:11127612-11127666	FRAP1	2475	rs3765901	chr1:11027262	MASP2	2e-12	local	0.5061
2396537	2396584	chr1:11127612-11127666	FRAP1	2475	rs7548659	chr1:11030025	MASP2	4e-12	local	0.547756
2396537	2396584	chr1:11127612-11127666	FRAP1	2475	rs1884429	chr1:11035422	SRM	1e-08	local	0.0291717
2396537	2396584	chr1:11127612-11127666	FRAP1	2475	rs2486920	chr1:11047636	EXOSC10	7e-16	local	0.400975
2396537	2396584	chr1:11127612-11127666	FRAP1	2475	rs2039840	chr1:11048452	EXOSC10	1e-16	local	0.394243
2396537	2396584	chr1:11127612-11127666	FRAP1	2475	rs2261217	chr1:11050350	EXOSC10	2e-14	local	0.382502
2396537	2396584	chr1:11127612-11127666	FRAP1	2475	rs2791657	chr1:11050587	EXOSC10	2e-15	local	0.40407
2396537	2396584	chr1:11127612-11127666	FRAP1	2475	rs2791655	chr1:11051240	EXOSC10	3e-13	local	0.350977
2396537	2396584	chr1:11127612-11127666	FRAP1	2475	rs1318348	chr1:11053004	EXOSC10	3e-14	local	0.475746
2396537	2396584	chr1:11127612-11127666	FRAP1	2475	rs910660	chr1:11053229	EXOSC10	7e-16	local	0.395264
2396537	2396584	chr1:11127612-11127666	FRAP1	2475	rs6540963	chr1:11054019	EXOSC10	2e-12	local	0.375944
2396537	2396584	chr1:11127612-11127666	FRAP1	2475	rs2802211	chr1:11054803	EXOSC10	7e-16	local	0.395264
2396537	2396584	chr1:11127612-11127666	FRAP1	2475	rs2791650	chr1:11055127	EXOSC10	7e-16	local	0.395264
2396537	2396584	chr1:11127612-11127666	FRAP1	2475	rs2791648	chr1:11055224	EXOSC10	7e-16	local	0.395264
2396537	2396584	chr1:11127612-11127666	FRAP1	2475	rs1148485	chr1:11071345	EXOSC10	6e-09	local	0.0102551
2396537	2396584	chr1:11127612-11127666	FRAP1	2475	rs1148480	chr1:11094592	FRAP1	2e-13	local	0.462687
2396537	2396584	chr1:11127612-11127666	FRAP1	2475	rs11121691	chr1:11103913	FRAP1	5e-09	local	0.0660075
2396537	2396584	chr1:11127612-11127666	FRAP1	2475	rs2275527	chr1:11113232	FRAP1	3e-09	local	0.0608561
2396537	2396584	chr1:11127612-11127666	FRAP1	2475	rs1417131	chr1:11114508	FRAP1	3e-09	local	0.02451
2396537	2396584	chr1:11127612-11127666	FRAP1	2475	rs12097293	chr1:11120053	FRAP1	2e-09	local	0.0230261
2396537	2396584	chr1:11127612-11127666	FRAP1	2475	rs6701524	chr1:11121088	FRAP1	6e-09	local	0.0986951
2396537	2396584	chr1:11127612-11127666	FRAP1	2475	rs2791643	chr1:11129855	FRAP1	3e-13	local	0.21802
2396537	2396584	chr1:11127612-11127666	FRAP1	2475	rs11581010	chr1:11135044	FRAP1	3e-12	local	0.038961
2396537	2396584	chr1:11127612-11127666	FRAP1	2475	rs11121695	chr1:11152101	FRAP1	2e-09	local	0.0230261
2396537	2396584	chr1:11127612-11127666	FRAP1	2475	rs11585553	chr1:11156400	FRAP1	3e-12	local	0.038961
2396537	2396584	chr1:11127612-11127666	FRAP1	2475	rs10864490	chr1:11158996	FRAP1	1e-08	local	0.119738
2396537	2396584	chr1:11127612-11127666	FRAP1	2475	rs1034528	chr1:11171718	ANGPTL7,FRAP1	7e-09	local	0.0702732
2396537	2396584	chr1:11127612-11127666	FRAP1	2475	rs2300095	chr1:11188303	FRAP1	4e-12	local	0.160044
2396537	2396584	chr1:11127612-11127666	FRAP1	2475	rs1010447	chr1:11192382	FRAP1	9e-12	local	0.180638
2396537	2396584	chr1:11127612-11127666	FRAP1	2475	rs4845982	chr1:11194162	FRAP1	6e-09	local	0.184591
2396537	2396584	chr1:11127612-11127666	FRAP1	2475	rs7526649	chr1:11200749	FRAP1	3e-11	local	0.210435
2396537	2396584	chr1:11127612-11127666	FRAP1	2475	rs10779751	chr1:11206922	FRAP1	2e-12	local	0.180638
2396537	2396584	chr1:11127612-11127666	FRAP1	2475	rs1064261	chr1:11211344	FRAP1	9e-13	local	0.173611
2396537	2396584	chr1:11127612-11127666	FRAP1	2475	rs11121703	chr1:11216378	FRAP1	3e-12	local	0.247006
2396537	2396584	chr1:11127612-11127666	FRAP1	2475	rs11121704	chr1:11216545	FRAP1	2e-12	local	0.172416
2396537	2396584	chr1:11127612-11127666	FRAP1	2475	rs718206	chr1:11217060	FRAP1	9e-12	local	0.180638
2396537	2396584	chr1:11127612-11127666	FRAP1	2475	rs2024627	chr1:11221376	FRAP1	4e-12	local	0.173611
2396537	2396584	chr1:11127612-11127666	FRAP1	2475	rs11121706	chr1:11224651	FRAP1	6e-12	local	0.248061
2396537	2396584	chr1:11127612-11127666	FRAP1	2475	rs1205592	chr1:11228249	FRAP1	3e-08	local	0.0111145
2396537	2396584	chr1:11127612-11127666	FRAP1	2475	rs11121710	chr1:11235830	FRAP1	1e-12	local	0.18783
2396537	2396584	chr1:11127612-11127666	FRAP1	2475	rs7525957	chr1:11240822	FRAP1	1e-11	local	0.258714
2396537	2396584	chr1:11127612-11127666	FRAP1	2475	rs1074078	chr1:11249374		1e-10	local	0.083143
2396537	2396584	chr1:11127612-11127666	FRAP1	2475	rs2809346	chr1:198862839	DDX59	3e-08	distant	0.108263
2391360	2391405	chr1:1244687-1244745	CPSF3L	54973	rs17089975	chr4:60733003		1e-08	distant	0
2391647	2391652	chr1:1469143-1469203	SSU72	29101	rs1571150	chr1:1464166	C1orf70	6e-12	local	0.140713
2391647	2391652	chr1:1469143-1469203	SSU72	29101	rs7290	chr1:1467106	SSU72	2e-22	local	0.495035
2391647	2391652	chr1:1469143-1469203	SSU72	29101	rs3766180	chr1:1468015	SSU72	2e-24	local	0.493517
2391647	2391652	chr1:1469143-1469203	SSU72	29101	rs3766178	chr1:1468042	SSU72	1e-23	local	0.449932
2391647	2391652	chr1:1469143-1469203	SSU72	29101	rs7533	chr1:1469195	SSU72	3e-23	local	0.486797
2391647	2391652	chr1:1469143-1469203	SSU72	29101	rs880051	chr1:1483589	SSU72	2e-08	local	0.308649
2391647	2391652	chr1:1469143-1469203	SSU72	29101	rs3766169	chr1:1487063	SSU72	9e-23	local	0.501914
2391647	2391652	chr1:1469143-1469203	SSU72	29101	rs9439468	chr1:1489160	SSU72	4e-18	local	0.42404
2391647	2391652	chr1:1469143-1469203	SSU72	29101	rs6603791	chr1:1490803	SSU72	9e-18	local	0.437274
2391647	2391652	chr1:1469143-1469203	SSU72	29101	rs6656541	chr1:1490926	SSU72	7e-18	local	0.437274
2391647	2391652	chr1:1469143-1469203	SSU72	29101	rs6603793	chr1:1495117	SSU72	7e-18	local	0.437274
2391647	2391652	chr1:1469143-1469203	SSU72	29101	rs7520996	chr1:1498896	SSU72	2e-16	local	0.460825
2391647	2391652	chr1:1469143-1469203	SSU72	29101	rs7519837	chr1:1500663		5e-18	local	0.433692
2360083	2360097	chr1:152473769-152473804	UBAP2L	9898	rs2291159	chr16:87218901	ZC3H18	1e-08	distant	0.00578444
2360083	2360097	chr1:152473769-152473804	UBAP2L	9898	rs201460	chr7:101528290	CUX1	4e-09	distant	0.0915426
2440327	2440329	chr1:158846581-158846669	SLAMF1	6504	rs2025516	chr1:158737379	SLAMF6	3e-22	local	0.148249
2440327	2440329	chr1:158846581-158846669	SLAMF1	6504	rs2025517	chr1:158737390	SLAMF6	1e-26	local	0.280652
2440327	2440329	chr1:158846581-158846669	SLAMF1	6504	rs17385337	chr1:158738762	SLAMF6	2e-15	local	0.0457516
2440327	2440329	chr1:158846581-158846669	SLAMF1	6504	rs6660233	chr1:158739786	SLAMF6	3e-26	local	0.249373
2440327	2440329	chr1:158846581-158846669	SLAMF1	6504	rs17385407	chr1:158739909	SLAMF6	1e-15	local	0.0565757
2440327	2440329	chr1:158846581-158846669	SLAMF1	6504	rs7528976	chr1:158766584		2e-37	local	0.274571
2440327	2440329	chr1:158846581-158846669	SLAMF1	6504	rs11583402	chr1:158770340		4e-17	local	0.0723147
2440327	2440329	chr1:158846581-158846669	SLAMF1	6504	rs2099604	chr1:158772410		2e-31	local	0.291437
2440327	2440329	chr1:158846581-158846669	SLAMF1	6504	rs7418241	chr1:158773707		1e-17	local	0.0717797
2440327	2440329	chr1:158846581-158846669	SLAMF1	6504	rs12144628	chr1:158776561		1e-35	local	0.263506
2440327	2440329	chr1:158846581-158846669	SLAMF1	6504	rs3816146	chr1:158778271		2e-35	local	0.25768
2440327	2440329	chr1:158846581-158846669	SLAMF1	6504	rs3733264	chr1:158783165	CD84	3e-12	local	0.00703473
2440327	2440329	chr1:158846581-158846669	SLAMF1	6504	rs3733265	chr1:158783263	CD84	3e-13	local	0.00910515
2440327	2440329	chr1:158846581-158846669	SLAMF1	6504	rs3733266	chr1:158783282	CD84	1e-14	local	0.00361215
2440327	2440329	chr1:158846581-158846669	SLAMF1	6504	rs3766388	chr1:158784102	CD84	1e-15	local	0.00774883
2440327	2440329	chr1:158846581-158846669	SLAMF1	6504	rs1055880	chr1:158784315	CD84	3e-14	local	0.00422159
2440327	2440329	chr1:158846581-158846669	SLAMF1	6504	rs3766387	chr1:158785863	CD84	3e-16	local	0.0277873
2440327	2440329	chr1:158846581-158846669	SLAMF1	6504	rs3766385	chr1:158786036	CD84	3e-14	local	0.0397972
2440327	2440329	chr1:158846581-158846669	SLAMF1	6504	rs2083128	chr1:158797050	CD84	3e-20	local	0.14524
2440327	2440329	chr1:158846581-158846669	SLAMF1	6504	rs7547054	chr1:158798841	CD84	2e-20	local	0.134444
2440327	2440329	chr1:158846581-158846669	SLAMF1	6504	rs11590035	chr1:158801307	CD84	1e-13	local	0.015241
2440327	2440329	chr1:158846581-158846669	SLAMF1	6504	rs6670721	chr1:158803184	CD84	1e-13	local	0.0130392
2440327	2440329	chr1:158846581-158846669	SLAMF1	6504	rs6687641	chr1:158805895	CD84	5e-22	local	0.108972
2440327	2440329	chr1:158846581-158846669	SLAMF1	6504	rs1998651	chr1:158807931	CD84	7e-37	local	0.246687
2440327	2440329	chr1:158846581-158846669	SLAMF1	6504	rs1572382	chr1:158811783	CD84	3e-26	local	0.0901001
2440327	2440329	chr1:158846581-158846669	SLAMF1	6504	rs977019	chr1:158816346	CD84	1e-40	local	0.276378
2440327	2440329	chr1:158846581-158846669	SLAMF1	6504	rs12402879	chr1:158817636		4e-33	local	0.174825
2440327	2440329	chr1:158846581-158846669	SLAMF1	6504	rs6668760	chr1:158818113		3e-26	local	0.0901001
2440327	2440329	chr1:158846581-158846669	SLAMF1	6504	rs6692382	chr1:158818215		1e-33	local	0.189675
2440327	2440329	chr1:158846581-158846669	SLAMF1	6504	rs11265442	chr1:158828556		1e-25	local	0.0877248
2440327	2440329	chr1:158846581-158846669	SLAMF1	6504	rs1604783	chr1:158835315		4e-43	local	0.257143
2440327	2440329	chr1:158846581-158846669	SLAMF1	6504	rs10797083	chr1:158838581		3e-33	local	0.184978
2440327	2440329	chr1:158846581-158846669	SLAMF1	6504	rs6662093	chr1:158840515		8e-18	local	0.0835325
2440327	2440329	chr1:158846581-158846669	SLAMF1	6504	rs6427535	chr1:158840592		2e-33	local	0.187278
2440327	2440329	chr1:158846581-158846669	SLAMF1	6504	rs10752638	chr1:158841434		6e-42	local	0.256168
2440327	2440329	chr1:158846581-158846669	SLAMF1	6504	rs17385878	chr1:158843779		1e-15	local	0.0188881
2440327	2440329	chr1:158846581-158846669	SLAMF1	6504	rs5002947	chr1:158844764	SLAMF1	5e-17	local	1.37242e-05
2440327	2440329	chr1:158846581-158846669	SLAMF1	6504	rs1061217	chr1:158846638	SLAMF1	1e-39	local	0.261436
2440327	2440329	chr1:158846581-158846669	SLAMF1	6504	rs1394078	chr1:158848020	SLAMF1	7e-18	local	0.0845
2440327	2440329	chr1:158846581-158846669	SLAMF1	6504	rs912582	chr1:158848522	SLAMF1	1e-17	local	0.0872026
2440327	2440329	chr1:158846581-158846669	SLAMF1	6504	rs11265449	chr1:158848871	SLAMF1	7e-12	local	0.210084
2440327	2440329	chr1:158846581-158846669	SLAMF1	6504	rs1809963	chr1:158849172	SLAMF1	8e-19	local	0.092179
2440327	2440329	chr1:158846581-158846669	SLAMF1	6504	rs7550771	chr1:158849347	SLAMF1	6e-22	local	0.107584
2440327	2440329	chr1:158846581-158846669	SLAMF1	6504	rs927202	chr1:158849987	SLAMF1	4e-10	local	0.170936
2440327	2440329	chr1:158846581-158846669	SLAMF1	6504	rs151607	chr1:158852329	SLAMF1	8e-20	local	0.0354791
2440327	2440329	chr1:158846581-158846669	SLAMF1	6504	rs2753260	chr1:158855218	SLAMF1	7e-20	local	0.0606316
2440327	2440329	chr1:158846581-158846669	SLAMF1	6504	rs16832283	chr1:158858620	SLAMF1	9e-09	local	0.0434783
2440327	2440329	chr1:158846581-158846669	SLAMF1	6504	rs11265452	chr1:158860861	SLAMF1	2e-08	local	0.0419703
2440327	2440329	chr1:158846581-158846669	SLAMF1	6504	rs1503854	chr1:158865633	SLAMF1	7e-09	local	0.0259949
2440327	2440329	chr1:158846581-158846669	SLAMF1	6504	rs3753381	chr1:158866033	SLAMF1	1e-10	local	0.0227215
2440327	2440329	chr1:158846581-158846669	SLAMF1	6504	rs3753383	chr1:158866275	SLAMF1	3e-09	local	0.0434058
2440327	2440329	chr1:158846581-158846669	SLAMF1	6504	rs6704124	chr1:158868871	SLAMF1	1e-09	local	0.00802463
2440327	2440329	chr1:158846581-158846669	SLAMF1	6504	rs2826816	chr21:21664138	NCAM2	9e-09	distant	0.0750391
2440327	2440329	chr1:158846581-158846669	SLAMF1	6504	rs2365530	chr4:73027127		3e-08	distant	0.179649
2440327	2440329	chr1:158846581-158846669	SLAMF1	6504	rs1949573	chr4:73042303		3e-08	distant	0.195602
2440327	2440329	chr1:158846581-158846669	SLAMF1	6504	rs11733593	chr4:73053176		3e-08	distant	0.266712
2440327	2440329	chr1:158846581-158846669	SLAMF1	6504	rs10518094	chr4:73053753		2e-08	distant	0.279543
2440327	2440329	chr1:158846581-158846669	SLAMF1	6504	rs11722798	chr4:73080741		1e-08	distant	0.276529
2440327	2440329	chr1:158846581-158846669	SLAMF1	6504	rs4694113	chr4:73088516		5e-09	distant	0.277365
2398073	2398103	chr1:16514341-16514492	FBXO42	54455	rs885795	chr1:16419552		1e-08	local	0.0306934
2398073	2398103	chr1:16514341-16514492	FBXO42	54455	rs6672616	chr1:16440208	LOC645652	3e-10	local	0.0471204
2398073	2398103	chr1:16514341-16514492	FBXO42	54455	rs964042	chr1:16442249	LOC645652	3e-10	local	0.00977778
2398073	2398103	chr1:16514341-16514492	FBXO42	54455	rs6693451	chr1:16446968		4e-11	local	0.00184379
2398073	2398103	chr1:16514341-16514492	FBXO42	54455	rs12069239	chr1:16450494	FBXO42	4e-11	local	0.00184379
2398073	2398103	chr1:16514341-16514492	FBXO42	54455	rs12136429	chr1:16456064	FBXO42	2e-13	local	0.0654785
2398073	2398103	chr1:16514341-16514492	FBXO42	54455	rs10489599	chr1:16458404	FBXO42	5e-13	local	0.0716893
2398073	2398103	chr1:16514341-16514492	FBXO42	54455	rs6698317	chr1:16463658	FBXO42	7e-11	local	0.0385725
2398073	2398103	chr1:16514341-16514492	FBXO42	54455	rs4661360	chr1:16472076	FBXO42	5e-11	local	0.000228126
2398073	2398103	chr1:16514341-16514492	FBXO42	54455	rs2047369	chr1:16474207	FBXO42	7e-11	local	7.51258e-05
2398073	2398103	chr1:16514341-16514492	FBXO42	54455	rs12144597	chr1:16475730	FBXO42	3e-11	local	0.0411645
2398073	2398103	chr1:16514341-16514492	FBXO42	54455	rs11590217	chr1:16480457	FBXO42	7e-11	local	7.51258e-05
2398073	2398103	chr1:16514341-16514492	FBXO42	54455	rs12120676	chr1:16486246	FBXO42	7e-11	local	7.51258e-05
2398073	2398103	chr1:16514341-16514492	FBXO42	54455	rs11260718	chr1:16490398	FBXO42	1e-12	local	0.0795132
2398073	2398103	chr1:16514341-16514492	FBXO42	54455	rs10489598	chr1:16491936	FBXO42	7e-09	local	0.0272862
2398073	2398103	chr1:16514341-16514492	FBXO42	54455	rs11260720	chr1:16493175	FBXO42	7e-11	local	7.51258e-05
2398073	2398103	chr1:16514341-16514492	FBXO42	54455	rs10489597	chr1:16495132	FBXO42	7e-11	local	7.51258e-05
2398073	2398103	chr1:16514341-16514492	FBXO42	54455	rs12132841	chr1:16508629	FBXO42	7e-11	local	7.51258e-05
2398073	2398103	chr1:16514341-16514492	FBXO42	54455	rs11804252	chr1:16515435	FBXO42	4e-11	local	0.000177047
2398073	2398103	chr1:16514341-16514492	FBXO42	54455	rs4661736	chr1:16517863	FBXO42	7e-11	local	7.51258e-05
2398073	2398103	chr1:16514341-16514492	FBXO42	54455	rs12131942	chr1:16524805	FBXO42	8e-13	local	0.0685707
2398073	2398103	chr1:16514341-16514492	FBXO42	54455	rs12134924	chr1:16527197	FBXO42	5e-13	local	0.0716893
2398073	2398103	chr1:16514341-16514492	FBXO42	54455	rs11260730	chr1:16538869	FBXO42	3e-13	local	0.0742706
2398073	2398103	chr1:16514341-16514492	FBXO42	54455	rs11260731	chr1:16540127	FBXO42	5e-10	local	0.000310078
2398073	2398103	chr1:16514341-16514492	FBXO42	54455	rs11260732	chr1:16541519	FBXO42	1e-10	local	0.0434028
2398073	2398103	chr1:16514341-16514492	FBXO42	54455	rs6681243	chr1:16545426	FBXO42	7e-11	local	7.59013e-05
2398073	2398103	chr1:16514341-16514492	FBXO42	54455	rs11260733	chr1:16548966	FBXO42	7e-11	local	7.59013e-05
2398073	2398103	chr1:16514341-16514492	FBXO42	54455	rs11260735	chr1:16554714		2e-12	local	0.100132
2398073	2398103	chr1:16514341-16514492	FBXO42	54455	rs10796412	chr1:16557479		4e-09	local	0.0601379
2398073	2398103	chr1:16514341-16514492	FBXO42	54455	rs9629265	chr1:16559380		4e-09	local	0.000299043
2398073	2398103	chr1:16514341-16514492	FBXO42	54455	rs6663056	chr1:16563609		6e-09	local	0.000164778
2398073	2398103	chr1:16514341-16514492	FBXO42	54455	rs6603859	chr1:16578661	C1orf144	1e-11	local	0.015873
2398073	2398103	chr1:16514341-16514492	FBXO42	54455	rs6675163	chr1:16602194	SPATA21	4e-14	local	0.076555
2398073	2398103	chr1:16514341-16514492	FBXO42	54455	rs6660924	chr1:16602286	SPATA21	5e-14	local	0.076555
2398073	2398103	chr1:16514341-16514492	FBXO42	54455	rs17419150	chr1:16603168	SPATA21	5e-24	local	0.162425
2398073	2398103	chr1:16514341-16514492	FBXO42	54455	rs513145	chr1:16603862	SPATA21	5e-13	local	0.085951
2398073	2398103	chr1:16514341-16514492	FBXO42	54455	rs673126	chr1:16605104	SPATA21	2e-13	local	0.0848461
2398073	2398103	chr1:16514341-16514492	FBXO42	54455	rs907796	chr1:16605446	SPATA21	5e-14	local	0.076555
2398073	2398103	chr1:16514341-16514492	FBXO42	54455	rs681474	chr1:16607170	SPATA21	2e-10	local	0.0686262
2398073	2398103	chr1:16514341-16514492	FBXO42	54455	rs681104	chr1:16607213	SPATA21	8e-09	local	0.0353845
2398073	2398103	chr1:16514341-16514492	FBXO42	54455	rs11260756	chr1:16632202	SPATA21	2e-09	local	0.018
2398073	2398103	chr1:16514341-16514492	FBXO42	54455	rs11681687	chr2:170880518	MYO3B	2e-08	distant	0.183608
2398073	2398103	chr1:16514341-16514492	FBXO42	54455	rs11696033	chr2:170882193	MYO3B	1e-08	distant	0.209019
2398073	2398103	chr1:16514341-16514492	FBXO42	54455	rs9677051	chr2:170882481	MYO3B	2e-08	distant	0.183608
2367743	2367757	chr1:171723505-171723613	PRDX6	9588	rs4916355	chr1:171658404		1e-10	local	0.163747
2367743	2367757	chr1:171723505-171723613	PRDX6	9588	rs10912617	chr1:171663368		6e-12	local	0.230036
2367743	2367757	chr1:171723505-171723613	PRDX6	9588	rs10912618	chr1:171666356		4e-11	local	0.173611
2367743	2367757	chr1:171723505-171723613	PRDX6	9588	rs4916358	chr1:171690421		4e-13	local	0.260592
2367743	2367757	chr1:171723505-171723613	PRDX6	9588	rs9425718	chr1:171691851		5e-13	local	0.251748
2367743	2367757	chr1:171723505-171723613	PRDX6	9588	rs9425719	chr1:171692644		5e-13	local	0.242303
2367743	2367757	chr1:171723505-171723613	PRDX6	9588	rs6696012	chr1:171695371		3e-11	local	0.186596
2367743	2367757	chr1:171723505-171723613	PRDX6	9588	rs12140760	chr1:171696617		5e-09	local	0.0529706
2367743	2367757	chr1:171723505-171723613	PRDX6	9588	rs10798282	chr1:171703646		4e-13	local	0.259191
2367743	2367757	chr1:171723505-171723613	PRDX6	9588	rs4916362	chr1:171708255		4e-13	local	0.260592
2367743	2367757	chr1:171723505-171723613	PRDX6	9588	rs7540065	chr1:171715658	PRDX6	1e-15	local	0.262916
2367743	2367757	chr1:171723505-171723613	PRDX6	9588	rs7314	chr1:171724221	PRDX6	6e-16	local	0.267019
2367743	2367757	chr1:171723505-171723613	PRDX6	9588	rs7550581	chr1:171751065	SLC9A11	2e-12	local	0.329944
2367743	2367757	chr1:171723505-171723613	PRDX6	9588	rs12745058	chr1:171756296	SLC9A11	8e-12	local	0.293015
2367743	2367757	chr1:171723505-171723613	PRDX6	9588	rs7516544	chr1:171758053	SLC9A11	3e-12	local	0.326166
2367743	2367757	chr1:171723505-171723613	PRDX6	9588	rs12565753	chr1:171758227	SLC9A11	1e-12	local	0.32893
2367743	2367757	chr1:171723505-171723613	PRDX6	9588	rs12090597	chr1:171830040	SLC9A11	3e-08	local	0.464075
2367743	2367757	chr1:171723505-171723613	PRDX6	9588	rs12078293	chr1:171831909	SLC9A11	2e-08	local	0.447095
2367743	2367757	chr1:171723505-171723613	PRDX6	9588	rs12092383	chr1:171843342	ANKRD45	2e-08	local	0.430417
2367743	2367757	chr1:171723505-171723613	PRDX6	9588	rs7514876	chr1:171860973	ANKRD45	2e-08	local	0.424898
2367743	2367757	chr1:171723505-171723613	PRDX6	9588	rs12067170	chr1:171872829	ANKRD45,LOC730159	1e-08	local	0.430417
2367743	2367757	chr1:171723505-171723613	PRDX6	9588	rs969029	chr1:171880993	ANKRD45	1e-08	local	0.430417
2367743	2367757	chr1:171723505-171723613	PRDX6	9588	rs12075071	chr1:171883147	ANKRD45	1e-08	local	0.430417
2367743	2367757	chr1:171723505-171723613	PRDX6	9588	rs10912660	chr1:171904140	ANKRD45	2e-08	local	0.430417
2451155	2451178	chr1:200394064-200394190	PTPN7	5778	rs7751151	chr6:11524547		1e-08	distant	0.0412221
2401493	2401498	chr1:23758038-23758097	ID3	3399	rs7802120	chr7:19724886	TMEM196	2e-10	distant	0.0129287
2401493	2401498	chr1:23758038-23758097	ID3	3399	rs2285927	chr7:19726957	TMEM196	8e-09	distant	0.00245557
2401493	2401498	chr1:23758038-23758097	ID3	3399	rs10255236	chr7:19733433	TMEM196	1e-09	distant	0.0121989
2404521	2404524	chr1:31868840-31868888	PEF1	553115	rs4949447	chr1:31829772		8e-11	local	0.459902
2404521	2404524	chr1:31868840-31868888	PEF1	553115	rs10914453	chr1:31847622		2e-10	local	0.0825714
2404521	2404524	chr1:31868840-31868888	PEF1	553115	rs3753613	chr1:31854586		4e-37	local	0.40939
2404521	2404524	chr1:31868840-31868888	PEF1	553115	rs3753612	chr1:31854996		8e-34	local	0.396532
2404521	2404524	chr1:31868840-31868888	PEF1	553115	rs968335	chr1:31858362	HCRTR1	4e-37	local	0.40939
2404521	2404524	chr1:31868840-31868888	PEF1	553115	rs10914456	chr1:31860757	HCRTR1	2e-15	local	0.20362
2404521	2404524	chr1:31868840-31868888	PEF1	553115	rs6663012	chr1:31864365	HCRTR1	5e-16	local	0.166308
2404521	2404524	chr1:31868840-31868888	PEF1	553115	rs2271933	chr1:31865111	HCRTR1	2e-16	local	0.173659
2404521	2404524	chr1:31868840-31868888	PEF1	553115	rs2176807	chr1:31865321	HCRTR1	1e-36	local	0.411093
2404521	2404524	chr1:31868840-31868888	PEF1	553115	rs871634	chr1:31865753	HCRTR1	4e-14	local	0.132579
2404521	2404524	chr1:31868840-31868888	PEF1	553115	rs6703093	chr1:31866147	PEF1	3e-30	local	0.395877
2404521	2404524	chr1:31868840-31868888	PEF1	553115	rs10914458	chr1:31869332	PEF1	2e-16	local	0.162725
2404521	2404524	chr1:31868840-31868888	PEF1	553115	rs10798880	chr1:31869674	PEF1	1e-13	local	0.160401
2404521	2404524	chr1:31868840-31868888	PEF1	553115	rs4949454	chr1:31871627	PEF1	4e-37	local	0.40939
2404521	2404524	chr1:31868840-31868888	PEF1	553115	rs7546297	chr1:31879080	PEF1	9e-15	local	0.14142
2404521	2404524	chr1:31868840-31868888	PEF1	553115	rs10798882	chr1:31881133	PEF1	3e-12	local	0.0298633
2404521	2404524	chr1:31868840-31868888	PEF1	553115	rs7524405	chr1:31881165	PEF1	1e-12	local	0.0331305
2404521	2404524	chr1:31868840-31868888	PEF1	553115	rs7549590	chr1:31882435	PEF1	2e-32	local	0.384
2404521	2404524	chr1:31868840-31868888	PEF1	553115	rs7542583	chr1:31883399	PEF1	4e-23	local	0.167305
2404521	2404524	chr1:31868840-31868888	PEF1	553115	rs4949455	chr1:31887379		2e-11	local	0.0487102
2404521	2404524	chr1:31868840-31868888	PEF1	553115	rs2139539	chr1:31890365	COL16A1	1e-29	local	0.393023
2404521	2404524	chr1:31868840-31868888	PEF1	553115	rs3817398	chr1:31892017	COL16A1	4e-17	local	0.149365
2404521	2404524	chr1:31868840-31868888	PEF1	553115	rs7545321	chr1:31894750	COL16A1	3e-10	local	0.0271204
2404521	2404524	chr1:31868840-31868888	PEF1	553115	rs10914462	chr1:31898529	COL16A1	1e-12	local	0.0498277
2404521	2404524	chr1:31868840-31868888	PEF1	553115	rs2271927	chr1:31900497	COL16A1	7e-11	local	0.0553139
2404521	2404524	chr1:31868840-31868888	PEF1	553115	rs2271928	chr1:31900539	COL16A1	2e-11	local	0.0723982
2404521	2404524	chr1:31868840-31868888	PEF1	553115	rs1356803	chr1:31903749	COL16A1	3e-23	local	0.395724
2404521	2404524	chr1:31868840-31868888	PEF1	553115	rs10914464	chr1:31904905	COL16A1	1e-11	local	0.452762
2404521	2404524	chr1:31868840-31868888	PEF1	553115	rs2292988	chr1:31906323	COL16A1	3e-13	local	0.0442456
2404521	2404524	chr1:31868840-31868888	PEF1	553115	rs7512805	chr1:31907349	COL16A1	2e-13	local	0.360905
2404521	2404524	chr1:31868840-31868888	PEF1	553115	rs6425778	chr1:31907608	COL16A1	2e-10	local	0.155801
2404521	2404524	chr1:31868840-31868888	PEF1	553115	rs7537646	chr1:31908081	COL16A1	9e-16	local	0.405522
2404521	2404524	chr1:31868840-31868888	PEF1	553115	rs2292989	chr1:31908359	COL16A1	1e-11	local	0.000582384
2404521	2404524	chr1:31868840-31868888	PEF1	553115	rs1474182	chr1:31908984	COL16A1	8e-12	local	0.270628
2404521	2404524	chr1:31868840-31868888	PEF1	553115	rs1474181	chr1:31909196	COL16A1	2e-10	local	0.253318
2404521	2404524	chr1:31868840-31868888	PEF1	553115	rs909002	chr1:31912221	COL16A1	2e-09	local	0.236835
2404521	2404524	chr1:31868840-31868888	PEF1	553115	rs4949456	chr1:31912625	COL16A1	1e-10	local	0.0189852
2404521	2404524	chr1:31868840-31868888	PEF1	553115	rs4949457	chr1:31912639	COL16A1	2e-10	local	9.58681e-05
2404521	2404524	chr1:31868840-31868888	PEF1	553115	rs10798883	chr1:31912891	COL16A1	4e-11	local	0.263945
2404521	2404524	chr1:31868840-31868888	PEF1	553115	rs2292993	chr1:31913319	COL16A1	2e-09	local	0.21262
2404521	2404524	chr1:31868840-31868888	PEF1	553115	rs3751488	chr14:22373933	MMP14,MRPL52	3e-08	distant	0.034341
2404521	2404524	chr1:31868840-31868888	PEF1	553115	rs12923618	chr16:6598709	A2BP1	3e-08	distant	0.045708
2406064	2406083	chr1:35422685-35422781	SFPQ	6421	rs11218322	chr11:120907594	SORL1	3e-09	distant	0.0276189
2406064	2406102	chr1:35431055-35431162	SFPQ	6421	rs2187483	chr4:100353125	ADH6	1e-08	distant	0.184099
2393654	2393671	chr1:3646086-3646118	KIAA0495	57212	rs11630928	chr15:66407100	ITGA11	3e-08	distant	0.233635
2393654	2393671	chr1:3646086-3646118	KIAA0495	57212	rs4797684	chr18:1250538		2e-09	distant	0.0542362
2393654	2393671	chr1:3646086-3646118	KIAA0495	57212	rs13049777	chr21:35605435		4e-09	distant	0.0917572
2393654	2393671	chr1:3646086-3646118	KIAA0495	57212	rs6467599	chr7:134915441	NUP205	1e-08	distant	0.0450761
2393654	2393673	chr1:3646411-3646566	KIAA0495	57212	rs4885018	chr13:72089635		1e-08	distant	0.00475908
2393654	2393673	chr1:3646411-3646566	KIAA0495	57212	rs10987905	chr9:129971406	CIZ1	3e-08	distant	0.0635601
2423264	2423272	chr1:93392859-93392997	TMED5	50999	rs1856027	chr1:93316718	MTF2	2e-52	local	0.391423
2423264	2423272	chr1:93392859-93392997	TMED5	50999	rs546445	chr1:93317216	MTF2	3e-10	local	0.464016
2423264	2423272	chr1:93392859-93392997	TMED5	50999	rs12038699	chr1:93331405	MTF2	1e-45	local	0.434353
2423264	2423272	chr1:93392859-93392997	TMED5	50999	rs1474927	chr1:93342955	MTF2	5e-46	local	0.394268
2423264	2423272	chr1:93392859-93392997	TMED5	50999	rs2295423	chr1:93353611	MTF2	8e-47	local	0.403135
2423264	2423272	chr1:93392859-93392997	TMED5	50999	rs550892	chr1:93356786	MTF2	8e-10	local	0.465995
2423264	2423272	chr1:93392859-93392997	TMED5	50999	rs2281525	chr1:93367893	MTF2	2e-17	local	0.176599
2423264	2423272	chr1:93392859-93392997	TMED5	50999	rs12080248	chr1:93378817		4e-10	local	0.471669
2423264	2423272	chr1:93392859-93392997	TMED5	50999	rs7555395	chr1:93383522		2e-10	local	0.469029
2423264	2423272	chr1:93392859-93392997	TMED5	50999	rs1572343	chr1:93388789	TMED5	2e-27	local	0.282712
2423264	2423272	chr1:93392859-93392997	TMED5	50999	rs4847235	chr1:93400314	TMED5	2e-15	local	0.0378967
2423264	2423272	chr1:93392859-93392997	TMED5	50999	rs10874762	chr1:93411688	TMED5	2e-31	local	0.340009
2423264	2423272	chr1:93392859-93392997	TMED5	50999	rs1335679	chr1:93417769	CCDC18,TMED5	2e-33	local	0.357039
2423264	2423272	chr1:93392859-93392997	TMED5	50999	rs7535628	chr1:93421315	CCDC18	2e-15	local	0.0411429
2423264	2423272	chr1:93392859-93392997	TMED5	50999	rs6682670	chr1:93422319	CCDC18	7e-32	local	0.357039
2423264	2423272	chr1:93392859-93392997	TMED5	50999	rs12118262	chr1:93424134	CCDC18	2e-33	local	0.357039
2423264	2423272	chr1:93392859-93392997	TMED5	50999	rs7539307	chr1:93425290	CCDC18	2e-15	local	0.0411429
2423264	2423272	chr1:93392859-93392997	TMED5	50999	rs11164879	chr1:93428109	CCDC18	6e-33	local	0.351367
2423264	2423272	chr1:93392859-93392997	TMED5	50999	rs7513705	chr1:93438936	CCDC18	1e-15	local	0.0412552
2423264	2423272	chr1:93392859-93392997	TMED5	50999	rs12030549	chr1:93441805	CCDC18	7e-33	local	0.357997
2423264	2423272	chr1:93392859-93392997	TMED5	50999	rs531358	chr1:93448598	CCDC18	2e-33	local	0.357039
2423264	2423272	chr1:93392859-93392997	TMED5	50999	rs2765545	chr1:93449856	CCDC18	4e-32	local	0.352263
2423264	2423272	chr1:93392859-93392997	TMED5	50999	rs4484937	chr1:93472112	CCDC18	3e-08	local	0.000127567
2423264	2423272	chr1:93392859-93392997	TMED5	50999	rs797680	chr1:93489561	CCDC18	2e-53	local	0.403135
2423264	2423272	chr1:93392859-93392997	TMED5	50999	rs12030843	chr1:93492657	CCDC18	3e-08	local	0.000127567
2423264	2423272	chr1:93392859-93392997	TMED5	50999	rs693737	chr1:93497511	CCDC18	8e-31	local	0.345929
2423264	2423272	chr1:93392859-93392997	TMED5	50999	rs6541401	chr1:93511535	CCDC18,LOC100130531	2e-33	local	0.357039
2423264	2423272	chr1:93392859-93392997	TMED5	50999	rs6541404	chr1:93516021	CCDC18,LOC100130531	2e-33	local	0.357039
2423264	2423272	chr1:93392859-93392997	TMED5	50999	rs9432681	chr1:93534483	LOC100130531	2e-32	local	0.368737
2423264	2423272	chr1:93392859-93392997	TMED5	50999	rs6680107	chr1:93543467	LOC100130531	7e-32	local	0.357039
2423264	2423272	chr1:93392859-93392997	TMED5	50999	rs9432453	chr1:93544216	LOC100130531	9e-30	local	0.324457
2423264	2423272	chr1:93392859-93392997	TMED5	50999	rs1000607	chr1:93544588	LOC100130531	2e-32	local	0.357997
2423264	2423272	chr1:93392859-93392997	TMED5	50999	rs4240966	chr1:93547399	LOC100130531	4e-32	local	0.3396
2423264	2423272	chr1:93392859-93392997	TMED5	50999	rs6701250	chr1:93556382	LOC100130531	1e-09	local	0.0225116
2423264	2423272	chr1:93392859-93392997	TMED5	50999	rs569414	chr1:93557488	LOC100130531	1e-29	local	0.347562
2423264	2423272	chr1:93392859-93392997	TMED5	50999	rs2031225	chr1:93559301	LOC100130531	4e-31	local	0.349034
2423264	2423272	chr1:93392859-93392997	TMED5	50999	rs6703310	chr1:93561327	LOC100130531	2e-31	local	0.365953
2423264	2423272	chr1:93392859-93392997	TMED5	50999	rs4847408	chr1:93564024	LOC100130531	2e-33	local	0.357039
2423264	2423272	chr1:93392859-93392997	TMED5	50999	rs2391254	chr1:93567753	LOC100130531	1e-29	local	0.343149
2423264	2423272	chr1:93392859-93392997	TMED5	50999	rs942196	chr1:93574851	LOC100130531,LOC100131564	2e-33	local	0.357039
2423264	2423272	chr1:93392859-93392997	TMED5	50999	rs10782959	chr1:93584156	DR1,LOC100131564	5e-14	local	0.229739
2423264	2423272	chr1:93392859-93392997	TMED5	50999	rs3767964	chr1:93588077	DR1	2e-26	local	0.30651
2423264	2423272	chr1:93392859-93392997	TMED5	50999	rs12133576	chr1:93588987	DR1	9e-28	local	0.3174
2423264	2423272	chr1:93392859-93392997	TMED5	50999	rs4847240	chr1:93590533	DR1	8e-30	local	0.328359
2423264	2423272	chr1:93392859-93392997	TMED5	50999	rs1559828	chr1:93598225	DR1	9e-28	local	0.3174
2423264	2423272	chr1:93392859-93392997	TMED5	50999	rs7525248	chr1:93601110	DR1	1e-27	local	0.312208
2423264	2423272	chr1:93392859-93392997	TMED5	50999	rs12752223	chr1:93609720		7e-44	local	0.372423
2423264	2423272	chr1:93392859-93392997	TMED5	50999	rs6694508	chr1:93614610		3e-27	local	0.306715
2423264	2423272	chr1:93392859-93392997	TMED5	50999	rs1426318	chr1:93620007		1e-25	local	0.30651
2423264	2423272	chr1:93392859-93392997	TMED5	50999	rs1593512	chr1:93630961		1e-27	local	0.31484
2423264	2423272	chr1:93392859-93392997	TMED5	50999	rs12406245	chr1:93633212		2e-27	local	0.317693
2423264	2423272	chr1:93392859-93392997	TMED5	50999	rs12138486	chr1:93637978		2e-12	local	0.381231
2423264	2423272	chr1:93392859-93392997	TMED5	50999	rs4847431	chr1:93757391	FNBP1L	1e-15	local	0.216723
2423264	2423272	chr1:93392859-93392997	TMED5	50999	rs237438	chr1:93775400	FNBP1L	3e-11	local	0.248061
3303652	3303658	chr10:102731257-102731290	MRPL43	84545	rs1467616	chr10:102631680		1e-09	local	0.0902256
3303652	3303658	chr10:102731257-102731290	MRPL43	84545	rs11595160	chr10:102632999		9e-17	local	0.0507938
3303652	3303658	chr10:102731257-102731290	MRPL43	84545	rs7901791	chr10:102635373		4e-18	local	0.0507938
3303652	3303658	chr10:102731257-102731290	MRPL43	84545	rs10786612	chr10:102643754		2e-16	local	0.0352067
3303652	3303658	chr10:102731257-102731290	MRPL43	84545	rs7902725	chr10:102657740		5e-11	local	0.0687791
3303652	3303658	chr10:102731257-102731290	MRPL43	84545	rs4917916	chr10:102663281	C10orf6	6e-27	local	0.0845563
3303652	3303658	chr10:102731257-102731290	MRPL43	84545	rs12241232	chr10:102682593	C10orf6	6e-27	local	0.0845563
3303652	3303658	chr10:102731257-102731290	MRPL43	84545	rs7911957	chr10:102682959	C10orf6	2e-26	local	0.0878013
3303652	3303658	chr10:102731257-102731290	MRPL43	84545	rs10883565	chr10:102693423	C10orf6	6e-26	local	0.0964643
3303652	3303658	chr10:102731257-102731290	MRPL43	84545	rs1056295	chr10:102705172	C10orf6	3e-32	local	0.116722
3303652	3303658	chr10:102731257-102731290	MRPL43	84545	rs927302	chr10:102712905	C10orf6	2e-33	local	0.111454
3303652	3303658	chr10:102731257-102731290	MRPL43	84545	rs4919510	chr10:102724767	SEMA4G	9e-37	local	0.133192
3303652	3303658	chr10:102731257-102731290	MRPL43	84545	rs735137	chr10:102725824	MRPL43,SEMA4G	2e-37	local	0.126287
3303652	3303658	chr10:102731257-102731290	MRPL43	84545	rs12571302	chr10:102732752	MRPL43,SEMA4G	2e-35	local	0.0766314
3303652	3303658	chr10:102731257-102731290	MRPL43	84545	rs2295716	chr10:102734203	MRPL43,SEMA4G	2e-36	local	0.128309
3303652	3303658	chr10:102731257-102731290	MRPL43	84545	rs722435	chr10:102735051	MRPL43,SEMA4G	2e-36	local	0.128309
3303652	3303658	chr10:102731257-102731290	MRPL43	84545	rs2863095	chr10:102736492	C10orf2,MRPL43	2e-40	local	0.0951161
3303652	3303658	chr10:102731257-102731290	MRPL43	84545	rs3740484	chr10:102737352	C10orf2,MRPL43	2e-25	local	0.056
3303652	3303658	chr10:102731257-102731290	MRPL43	84545	rs3740487	chr10:102740772	C10orf2	3e-33	local	0.149347
3303652	3303658	chr10:102731257-102731290	MRPL43	84545	rs3824783	chr10:102740840	C10orf2	2e-33	local	0.149347
3303652	3303658	chr10:102731257-102731290	MRPL43	84545	rs3740488	chr10:102744022	C10orf2	4e-33	local	0.169551
3303652	3303658	chr10:102731257-102731290	MRPL43	84545	rs3740490	chr10:102746732	LZTS2	2e-38	local	0.106297
3303652	3303658	chr10:102731257-102731290	MRPL43	84545	rs750866	chr10:102751447	LZTS2	3e-38	local	0.0963126
3303652	3303658	chr10:102731257-102731290	MRPL43	84545	rs701835	chr10:102752116	LZTS2	3e-38	local	0.0963126
3303652	3303658	chr10:102731257-102731290	MRPL43	84545	rs807029	chr10:102754036	LZTS2	5e-17	local	0.167026
3303652	3303658	chr10:102731257-102731290	MRPL43	84545	rs701836	chr10:102757106	LOC100132914,LZTS2	7e-28	local	0.076555
3303652	3303664	chr10:102736290-102736315	MRPL43	84545	rs1467616	chr10:102631680		2e-09	local	0.0902256
3303652	3303664	chr10:102736290-102736315	MRPL43	84545	rs11595160	chr10:102632999		2e-17	local	0.0507938
3303652	3303664	chr10:102736290-102736315	MRPL43	84545	rs7901791	chr10:102635373		1e-20	local	0.0507938
3303652	3303664	chr10:102736290-102736315	MRPL43	84545	rs10786612	chr10:102643754		8e-16	local	0.0352067
3303652	3303664	chr10:102736290-102736315	MRPL43	84545	rs7902725	chr10:102657740		8e-09	local	0.0687791
3303652	3303664	chr10:102736290-102736315	MRPL43	84545	rs4917916	chr10:102663281	C10orf6	2e-31	local	0.0845563
3303652	3303664	chr10:102736290-102736315	MRPL43	84545	rs12241232	chr10:102682593	C10orf6	2e-31	local	0.0845563
3303652	3303664	chr10:102736290-102736315	MRPL43	84545	rs7911957	chr10:102682959	C10orf6	3e-31	local	0.0878013
3303652	3303664	chr10:102736290-102736315	MRPL43	84545	rs10883565	chr10:102693423	C10orf6	1e-29	local	0.0964643
3303652	3303664	chr10:102736290-102736315	MRPL43	84545	rs1056295	chr10:102705172	C10orf6	6e-36	local	0.116722
3303652	3303664	chr10:102736290-102736315	MRPL43	84545	rs927302	chr10:102712905	C10orf6	1e-37	local	0.111454
3303652	3303664	chr10:102736290-102736315	MRPL43	84545	rs4919510	chr10:102724767	SEMA4G	3e-39	local	0.133192
3303652	3303664	chr10:102736290-102736315	MRPL43	84545	rs735137	chr10:102725824	MRPL43,SEMA4G	5e-40	local	0.126287
3303652	3303664	chr10:102736290-102736315	MRPL43	84545	rs12571302	chr10:102732752	MRPL43,SEMA4G	1e-39	local	0.0766314
3303652	3303664	chr10:102736290-102736315	MRPL43	84545	rs2295716	chr10:102734203	MRPL43,SEMA4G	8e-39	local	0.128309
3303652	3303664	chr10:102736290-102736315	MRPL43	84545	rs722435	chr10:102735051	MRPL43,SEMA4G	8e-39	local	0.128309
3303652	3303664	chr10:102736290-102736315	MRPL43	84545	rs2863095	chr10:102736492	C10orf2,MRPL43	1e-44	local	0.0951161
3303652	3303664	chr10:102736290-102736315	MRPL43	84545	rs3740484	chr10:102737352	C10orf2,MRPL43	2e-26	local	0.056
3303652	3303664	chr10:102736290-102736315	MRPL43	84545	rs3740487	chr10:102740772	C10orf2	2e-35	local	0.149347
3303652	3303664	chr10:102736290-102736315	MRPL43	84545	rs3824783	chr10:102740840	C10orf2	8e-36	local	0.149347
3303652	3303664	chr10:102736290-102736315	MRPL43	84545	rs3740488	chr10:102744022	C10orf2	1e-35	local	0.169551
3303652	3303664	chr10:102736290-102736315	MRPL43	84545	rs3740490	chr10:102746732	LZTS2	3e-43	local	0.106297
3303652	3303664	chr10:102736290-102736315	MRPL43	84545	rs750866	chr10:102751447	LZTS2	3e-40	local	0.0963126
3303652	3303664	chr10:102736290-102736315	MRPL43	84545	rs701835	chr10:102752116	LZTS2	3e-40	local	0.0963126
3303652	3303664	chr10:102736290-102736315	MRPL43	84545	rs807029	chr10:102754036	LZTS2	1e-15	local	0.167026
3303652	3303664	chr10:102736290-102736315	MRPL43	84545	rs701836	chr10:102757106	LOC100132914,LZTS2	8e-27	local	0.076555
3303652	3303664	chr10:102736290-102736315	MRPL43	84545	rs807018	chr10:102763000		5e-10	local	0.0686813
3303652	3303666	chr10:102736391-102736416	MRPL43	84545	rs1467616	chr10:102631680		1e-08	local	0.0902256
3303652	3303666	chr10:102736391-102736416	MRPL43	84545	rs11595160	chr10:102632999		4e-12	local	0.0507938
3303652	3303666	chr10:102736391-102736416	MRPL43	84545	rs7901791	chr10:102635373		5e-15	local	0.0507938
3303652	3303666	chr10:102736391-102736416	MRPL43	84545	rs10786612	chr10:102643754		1e-12	local	0.0352067
3303652	3303666	chr10:102736391-102736416	MRPL43	84545	rs10883558	chr10:102653186		3e-08	local	0.00011396
3303652	3303666	chr10:102736391-102736416	MRPL43	84545	rs4917916	chr10:102663281	C10orf6	3e-26	local	0.0845563
3303652	3303666	chr10:102736391-102736416	MRPL43	84545	rs12241232	chr10:102682593	C10orf6	3e-26	local	0.0845563
3303652	3303666	chr10:102736391-102736416	MRPL43	84545	rs7911957	chr10:102682959	C10orf6	8e-26	local	0.0878013
3303652	3303666	chr10:102736391-102736416	MRPL43	84545	rs10883565	chr10:102693423	C10orf6	5e-26	local	0.0964643
3303652	3303666	chr10:102736391-102736416	MRPL43	84545	rs1056295	chr10:102705172	C10orf6	3e-30	local	0.116722
3303652	3303666	chr10:102736391-102736416	MRPL43	84545	rs927302	chr10:102712905	C10orf6	1e-31	local	0.111454
3303652	3303666	chr10:102736391-102736416	MRPL43	84545	rs4919510	chr10:102724767	SEMA4G	6e-28	local	0.133192
3303652	3303666	chr10:102736391-102736416	MRPL43	84545	rs735137	chr10:102725824	MRPL43,SEMA4G	7e-28	local	0.126287
3303652	3303666	chr10:102736391-102736416	MRPL43	84545	rs12571302	chr10:102732752	MRPL43,SEMA4G	7e-29	local	0.0766314
3303652	3303666	chr10:102736391-102736416	MRPL43	84545	rs2295716	chr10:102734203	MRPL43,SEMA4G	6e-28	local	0.128309
3303652	3303666	chr10:102736391-102736416	MRPL43	84545	rs722435	chr10:102735051	MRPL43,SEMA4G	6e-28	local	0.128309
3303652	3303666	chr10:102736391-102736416	MRPL43	84545	rs2863095	chr10:102736492	C10orf2,MRPL43	3e-32	local	0.0951161
3303652	3303666	chr10:102736391-102736416	MRPL43	84545	rs3740484	chr10:102737352	C10orf2,MRPL43	5e-21	local	0.056
3303652	3303666	chr10:102736391-102736416	MRPL43	84545	rs3740487	chr10:102740772	C10orf2	1e-24	local	0.149347
3303652	3303666	chr10:102736391-102736416	MRPL43	84545	rs3824783	chr10:102740840	C10orf2	6e-25	local	0.149347
3303652	3303666	chr10:102736391-102736416	MRPL43	84545	rs3740488	chr10:102744022	C10orf2	1e-24	local	0.169551
3303652	3303666	chr10:102736391-102736416	MRPL43	84545	rs3740490	chr10:102746732	LZTS2	1e-30	local	0.106297
3303652	3303666	chr10:102736391-102736416	MRPL43	84545	rs750866	chr10:102751447	LZTS2	1e-28	local	0.0963126
3303652	3303666	chr10:102736391-102736416	MRPL43	84545	rs701835	chr10:102752116	LZTS2	1e-28	local	0.0963126
3303652	3303666	chr10:102736391-102736416	MRPL43	84545	rs807029	chr10:102754036	LZTS2	1e-09	local	0.167026
3303652	3303666	chr10:102736391-102736416	MRPL43	84545	rs701836	chr10:102757106	LOC100132914,LZTS2	4e-19	local	0.076555
3303652	3303666	chr10:102736391-102736416	MRPL43	84545	rs807018	chr10:102763000		2e-09	local	0.0686813
3236786	3236819	chr10:16595519-16595641	PTER	9317	rs1331255	chr10:16593723	PTER	2e-08	local	0.000707603
3236786	3236819	chr10:16595519-16595641	PTER	9317	rs7075357	chr10:16594259	C1QL3,PTER	3e-29	local	0.128799
3236786	3236819	chr10:16595519-16595641	PTER	9317	rs1055340	chr10:16595533	C1QL3,PTER	5e-36	local	0.118519
3236786	3236819	chr10:16595519-16595641	PTER	9317	rs4748302	chr10:16595867	C1QL3,PTER	1e-33	local	0.110352
3236786	3236819	chr10:16595519-16595641	PTER	9317	rs7909832	chr10:16596715	C1QL3	8e-23	local	0.0440917
3279575	3279625	chr10:16836893-16836932	RSU1	6251	rs4748320	chr10:16827375	RSU1	4e-17	local	0.0759396
3279575	3279625	chr10:16836893-16836932	RSU1	6251	rs4748321	chr10:16827565	RSU1	1e-21	local	0.0931456
3279575	3279625	chr10:16836893-16836932	RSU1	6251	rs6602152	chr10:16834096	RSU1	6e-18	local	0.227256
3279575	3279625	chr10:16836893-16836932	RSU1	6251	rs1049632	chr10:16836924	RSU1	3e-54	local	0.218324
3279575	3279625	chr10:16836893-16836932	RSU1	6251	rs7910261	chr10:16837038	RSU1	3e-15	local	0.454675
3279575	3279625	chr10:16836893-16836932	RSU1	6251	rs10904800	chr10:16838209	RSU1	2e-09	local	0.0957363
3279575	3279625	chr10:16836893-16836932	RSU1	6251	rs10904808	chr10:16868245	RSU1	5e-09	local	0.392271
3279575	3279625	chr10:16836893-16836932	RSU1	6251	rs6602159	chr10:16872566	RSU1	2e-08	local	0.424207
3279575	3279625	chr10:16836893-16836932	RSU1	6251	rs625087	chr11:112629641	NCAM1	1e-08	distant	0.0605125
3279575	3279625	chr10:16836893-16836932	RSU1	6251	rs3815479	chr12:7734639	GDF3	3e-08	distant	0.00883904
3279575	3279625	chr10:16836893-16836932	RSU1	6251	rs8023794	chr15:42806562		2e-08	distant	0.0104277
3279575	3279659	chr10:16899333-16899435	RSU1	6251	rs12253979	chr10:16893420	RSU1	3e-08	local	0.167412
3279575	3279659	chr10:16899333-16899435	RSU1	6251	rs7904368	chr10:16898592	RSU1	3e-08	local	0.413142
3281068	3281092	chr10:22879615-22879696	LOC643475	643475	rs7521047	chr1:152342989	NUP210L	2e-08	distant	0.082856
3281068	3281092	chr10:22879615-22879696	PIP5K2A	5305	rs7521047	chr1:152342989	NUP210L	2e-08	distant	0.082856
3281068	3281092	chr10:22879615-22879696	PIP5K2A	5305	rs10828311	chr10:22849653		9e-12	local	0.125434
3281068	3281092	chr10:22879615-22879696	LOC643475	643475	rs10828311	chr10:22849653		9e-12	local	0.125434
3281068	3281092	chr10:22879615-22879696	LOC643475	643475	rs12355895	chr10:22860537		5e-09	local	0.169391
3281068	3281092	chr10:22879615-22879696	PIP5K2A	5305	rs12355895	chr10:22860537		5e-09	local	0.169391
3281068	3281092	chr10:22879615-22879696	LOC643475	643475	rs9787624	chr10:22862398	PIP4K2A	8e-09	local	0.120053
3281068	3281092	chr10:22879615-22879696	PIP5K2A	5305	rs9787624	chr10:22862398	PIP4K2A	8e-09	local	0.120053
3281068	3281092	chr10:22879615-22879696	PIP5K2A	5305	rs8341	chr10:22865138	PIP4K2A	3e-12	local	0.0927872
3281068	3281092	chr10:22879615-22879696	LOC643475	643475	rs8341	chr10:22865138	PIP4K2A	3e-12	local	0.0927872
3281068	3281092	chr10:22879615-22879696	PIP5K2A	5305	rs1158	chr10:22865293	PIP4K2A	3e-09	local	0.0151281
3281068	3281092	chr10:22879615-22879696	LOC643475	643475	rs1158	chr10:22865293	PIP4K2A	3e-09	local	0.0151281
3281068	3281092	chr10:22879615-22879696	PIP5K2A	5305	rs1053454	chr10:22866098	PIP4K2A	1e-12	local	0.0909091
3281068	3281092	chr10:22879615-22879696	LOC643475	643475	rs1053454	chr10:22866098	PIP4K2A	1e-12	local	0.0909091
3281068	3281092	chr10:22879615-22879696	LOC643475	643475	rs11013045	chr10:22867279	PIP4K2A	3e-09	local	0.0671136
3281068	3281092	chr10:22879615-22879696	PIP5K2A	5305	rs11013045	chr10:22867279	PIP4K2A	3e-09	local	0.0671136
3281068	3281092	chr10:22879615-22879696	PIP5K2A	5305	rs4748810	chr10:22868368	PIP4K2A	1e-14	local	0.140282
3281068	3281092	chr10:22879615-22879696	LOC643475	643475	rs4748810	chr10:22868368	PIP4K2A	1e-14	local	0.140282
3281068	3281092	chr10:22879615-22879696	LOC643475	643475	rs746203	chr10:22870546	PIP4K2A	5e-10	local	0.0765231
3281068	3281092	chr10:22879615-22879696	PIP5K2A	5305	rs746203	chr10:22870546	PIP4K2A	5e-10	local	0.0765231
3281068	3281092	chr10:22879615-22879696	LOC643475	643475	rs10828314	chr10:22874972	PIP4K2A	2e-09	local	0.0673016
3281068	3281092	chr10:22879615-22879696	PIP5K2A	5305	rs10828314	chr10:22874972	PIP4K2A	2e-09	local	0.0673016
3281068	3281092	chr10:22879615-22879696	LOC643475	643475	rs10828315	chr10:22875928	PIP4K2A	1e-09	local	0.0261564
3281068	3281092	chr10:22879615-22879696	PIP5K2A	5305	rs10828315	chr10:22875928	PIP4K2A	1e-09	local	0.0261564
3281068	3281092	chr10:22879615-22879696	LOC643475	643475	rs4748811	chr10:22878270	PIP4K2A	6e-13	local	0.0750919
3281068	3281092	chr10:22879615-22879696	PIP5K2A	5305	rs4748811	chr10:22878270	PIP4K2A	6e-13	local	0.0750919
3281068	3281092	chr10:22879615-22879696	LOC643475	643475	rs10828316	chr10:22878394	PIP4K2A	2e-20	local	0.159299
3281068	3281092	chr10:22879615-22879696	PIP5K2A	5305	rs10828316	chr10:22878394	PIP4K2A	2e-20	local	0.159299
3281068	3281092	chr10:22879615-22879696	LOC643475	643475	rs10047326	chr10:22879468	PIP4K2A	1e-14	local	0.0829092
3281068	3281092	chr10:22879615-22879696	PIP5K2A	5305	rs10047326	chr10:22879468	PIP4K2A	1e-14	local	0.0829092
3281068	3281092	chr10:22879615-22879696	PIP5K2A	5305	rs10828317	chr10:22879633	PIP4K2A	2e-20	local	0.159299
3281068	3281092	chr10:22879615-22879696	LOC643475	643475	rs10828317	chr10:22879633	PIP4K2A	2e-20	local	0.159299
3281068	3281092	chr10:22879615-22879696	PIP5K2A	5305	rs11013046	chr10:22880588	PIP4K2A	2e-11	local	0.0643985
3281068	3281092	chr10:22879615-22879696	LOC643475	643475	rs11013046	chr10:22880588	PIP4K2A	2e-11	local	0.0643985
3281068	3281092	chr10:22879615-22879696	PIP5K2A	5305	rs943190	chr10:22882373	LOC643475,PIP4K2A	2e-13	local	0.0191861
3281068	3281092	chr10:22879615-22879696	LOC643475	643475	rs943190	chr10:22882373	LOC643475,PIP4K2A	2e-13	local	0.0191861
3281068	3281092	chr10:22879615-22879696	LOC643475	643475	rs943189	chr10:22882595	LOC643475,PIP4K2A	1e-11	local	0.0017047
3281068	3281092	chr10:22879615-22879696	PIP5K2A	5305	rs943189	chr10:22882595	LOC643475,PIP4K2A	1e-11	local	0.0017047
3281068	3281092	chr10:22879615-22879696	PIP5K2A	5305	rs12146350	chr10:22883116	LOC643475,PIP4K2A	4e-11	local	0.132459
3281068	3281092	chr10:22879615-22879696	LOC643475	643475	rs12146350	chr10:22883116	LOC643475,PIP4K2A	4e-11	local	0.132459
3281068	3281092	chr10:22879615-22879696	PIP5K2A	5305	rs4747442	chr10:22884104	LOC643475,PIP4K2A	1e-12	local	0.130282
3281068	3281092	chr10:22879615-22879696	LOC643475	643475	rs4747442	chr10:22884104	LOC643475,PIP4K2A	1e-12	local	0.130282
3281068	3281092	chr10:22879615-22879696	PIP5K2A	5305	rs4748813	chr10:22886740	LOC643475,PIP4K2A	2e-09	local	0.0561997
3281068	3281092	chr10:22879615-22879696	LOC643475	643475	rs4748813	chr10:22886740	LOC643475,PIP4K2A	2e-09	local	0.0561997
3281068	3281092	chr10:22879615-22879696	PIP5K2A	5305	rs4748814	chr10:22887203	LOC643475,PIP4K2A	4e-09	local	0.0588977
3281068	3281092	chr10:22879615-22879696	LOC643475	643475	rs4748814	chr10:22887203	LOC643475,PIP4K2A	4e-09	local	0.0588977
3281068	3281092	chr10:22879615-22879696	PIP5K2A	5305	rs7094131	chr10:22887444	LOC643475,PIP4K2A	1e-11	local	0.141067
3281068	3281092	chr10:22879615-22879696	LOC643475	643475	rs7094131	chr10:22887444	LOC643475,PIP4K2A	1e-11	local	0.141067
3281068	3281092	chr10:22879615-22879696	PIP5K2A	5305	rs12241748	chr10:22888316	PIP4K2A	3e-09	local	0.0675286
3281068	3281092	chr10:22879615-22879696	LOC643475	643475	rs12241748	chr10:22888316	PIP4K2A	3e-09	local	0.0675286
3281068	3281092	chr10:22879615-22879696	PIP5K2A	5305	rs11013048	chr10:22889570	PIP4K2A	7e-13	local	0.00353255
3281068	3281092	chr10:22879615-22879696	LOC643475	643475	rs11013048	chr10:22889570	PIP4K2A	7e-13	local	0.00353255
3281068	3281092	chr10:22879615-22879696	PIP5K2A	5305	rs7088318	chr10:22892953	PIP4K2A	2e-11	local	0.0681029
3281068	3281092	chr10:22879615-22879696	LOC643475	643475	rs7088318	chr10:22892953	PIP4K2A	2e-11	local	0.0681029
3281068	3281092	chr10:22879615-22879696	PIP5K2A	5305	rs7075634	chr10:22893107	PIP4K2A	1e-09	local	0.0720924
3281068	3281092	chr10:22879615-22879696	LOC643475	643475	rs7075634	chr10:22893107	PIP4K2A	1e-09	local	0.0720924
3281068	3281092	chr10:22879615-22879696	LOC643475	643475	rs12253847	chr10:22899661	PIP4K2A	1e-08	local	0.0006378
3281068	3281092	chr10:22879615-22879696	PIP5K2A	5305	rs12253847	chr10:22899661	PIP4K2A	1e-08	local	0.0006378
3281068	3281092	chr10:22879615-22879696	LOC643475	643475	rs4785473	chr16:49495958		3e-09	distant	0.205722
3281068	3281092	chr10:22879615-22879696	PIP5K2A	5305	rs4785473	chr16:49495958		3e-09	distant	0.205722
3281068	3281092	chr10:22879615-22879696	PIP5K2A	5305	rs12675477	chr8:72537881		3e-08	distant	0.0764241
3281068	3281092	chr10:22879615-22879696	LOC643475	643475	rs12675477	chr8:72537881		3e-08	distant	0.0764241
3281068	3281169	chr10:23043132-23043239	LOC643475	643475	rs10484978	chr6:85127115		3e-08	distant	0.00961538
3281068	3281169	chr10:23043132-23043239	PIP5K2A	5305	rs10484978	chr6:85127115		3e-08	distant	0.00961538
3281068	3281169	chr10:23043132-23043239	PIP5K2A	5305	rs10484976	chr6:85129692		3e-08	distant	0.00961538
3281068	3281169	chr10:23043132-23043239	LOC643475	643475	rs10484976	chr6:85129692		3e-08	distant	0.00961538
3281068	3281169	chr10:23043132-23043239	LOC643475	643475	rs7761054	chr6:85130695		3e-08	distant	0.00961538
3281068	3281169	chr10:23043132-23043239	PIP5K2A	5305	rs7761054	chr6:85130695		3e-08	distant	0.00961538
3289631	3289645	chr10:53127978-53128074	CSTF2T	23283	rs16921608	chr10:53126604	CSTF2T,PRKG1	5e-18	local	0.147197
3289631	3289645	chr10:53127978-53128074	CSTF2T	23283	rs3740228	chr10:53128052	CSTF2T,PRKG1	4e-18	local	0.158194
3289631	3289645	chr10:53127978-53128074	CSTF2T	23283	rs2292828	chr10:53129003	CSTF2T,PRKG1	2e-14	local	0.305556
3289631	3289645	chr10:53127978-53128074	CSTF2T	23283	rs3812672	chr10:53129678	CSTF2T,PRKG1	5e-18	local	0.153446
3289631	3289645	chr10:53127978-53128074	CSTF2T	23283	rs10823447	chr10:53137984	PRKG1	4e-09	local	0.312069
3289631	3289645	chr10:53127978-53128074	CSTF2T	23283	rs7089114	chr10:53138030	PRKG1	3e-14	local	0.30209
3289631	3289645	chr10:53127978-53128074	CSTF2T	23283	rs10508961	chr10:53140006	PRKG1	2e-10	local	0.163683
3289631	3289645	chr10:53127978-53128074	CSTF2T	23283	rs10762327	chr10:53148275	PRKG1	2e-09	local	0.0636266
3275132	3275534	chr10:5888685-5888730	GDI2	2665	rs17255171	chr14:58589794		2e-08	distant	0.0204082
3251393	3251408	chr10:73705549-73705614	DDIT4	54541	rs10106273	chr8:15973408		3e-08	distant	0.027984
3294242	3294253	chr10:74567788-74567834	ECD	11319	rs16843235	chr1:196752316		1e-08	distant	0.0365505
3294242	3294253	chr10:74567788-74567834	ECD	11319	rs4522088	chr10:74427877		2e-11	local	0.000851024
3294242	3294253	chr10:74567788-74567834	ECD	11319	rs4529828	chr10:74430113		2e-11	local	0.00113636
3294242	3294253	chr10:74567788-74567834	ECD	11319	rs7897191	chr10:74431508		1e-39	local	0.165209
3294242	3294253	chr10:74567788-74567834	ECD	11319	rs11000486	chr10:74432553		8e-15	local	0.0446056
3294242	3294253	chr10:74567788-74567834	ECD	11319	rs7922533	chr10:74433358		6e-39	local	0.165209
3294242	3294253	chr10:74567788-74567834	ECD	11319	rs12573768	chr10:74434079		8e-15	local	0.0446056
3294242	3294253	chr10:74567788-74567834	ECD	11319	rs2394925	chr10:74434118		1e-39	local	0.165209
3294242	3294253	chr10:74567788-74567834	ECD	11319	rs11000488	chr10:74435062	P4HA1	8e-15	local	0.0446056
3294242	3294253	chr10:74567788-74567834	ECD	11319	rs8380	chr10:74437340	P4HA1	2e-14	local	0.340313
3294242	3294253	chr10:74567788-74567834	ECD	11319	rs16930262	chr10:74437700	P4HA1	8e-15	local	0.0446056
3294242	3294253	chr10:74567788-74567834	ECD	11319	rs12253630	chr10:74438929	P4HA1	1e-39	local	0.165209
3294242	3294253	chr10:74567788-74567834	ECD	11319	rs7085141	chr10:74446786	P4HA1	1e-38	local	0.171101
3294242	3294253	chr10:74567788-74567834	ECD	11319	rs12249050	chr10:74449542	P4HA1	2e-39	local	0.164001
3294242	3294253	chr10:74567788-74567834	ECD	11319	rs12253317	chr10:74451535	P4HA1	2e-39	local	0.165209
3294242	3294253	chr10:74567788-74567834	ECD	11319	rs3736278	chr10:74460385	P4HA1	1e-39	local	0.165209
3294242	3294253	chr10:74567788-74567834	ECD	11319	rs12248308	chr10:74461627	P4HA1	8e-15	local	0.0446056
3294242	3294253	chr10:74567788-74567834	ECD	11319	rs7094342	chr10:74462171	P4HA1	2e-39	local	0.164001
3294242	3294253	chr10:74567788-74567834	ECD	11319	rs7076642	chr10:74462468	P4HA1	2e-39	local	0.164001
3294242	3294253	chr10:74567788-74567834	ECD	11319	rs12244049	chr10:74466668	P4HA1	1e-14	local	0.0438424
3294242	3294253	chr10:74567788-74567834	ECD	11319	rs12249126	chr10:74470637	P4HA1	8e-15	local	0.0446056
3294242	3294253	chr10:74567788-74567834	ECD	11319	rs10823975	chr10:74474449	P4HA1	2e-14	local	0.0484173
3294242	3294253	chr10:74567788-74567834	ECD	11319	rs11000499	chr10:74474937	P4HA1	8e-15	local	0.0446056
3294242	3294253	chr10:74567788-74567834	ECD	11319	rs6480659	chr10:74479622	P4HA1	1e-38	local	0.171101
3294242	3294253	chr10:74567788-74567834	ECD	11319	rs7078818	chr10:74480548	P4HA1	2e-39	local	0.164001
3294242	3294253	chr10:74567788-74567834	ECD	11319	rs12258500	chr10:74489026	P4HA1	5e-14	local	0.0428712
3294242	3294253	chr10:74567788-74567834	ECD	11319	rs12244027	chr10:74489594	P4HA1	1e-39	local	0.165209
3294242	3294253	chr10:74567788-74567834	ECD	11319	rs12262696	chr10:74491110	P4HA1	2e-14	local	0.032016
3294242	3294253	chr10:74567788-74567834	ECD	11319	rs12249431	chr10:74495201	P4HA1	4e-14	local	0.0384615
3294242	3294253	chr10:74567788-74567834	ECD	11319	rs7908682	chr10:74499313	P4HA1	2e-37	local	0.161566
3294242	3294253	chr10:74567788-74567834	ECD	11319	rs4387274	chr10:74501303	P4HA1	1e-39	local	0.165209
3294242	3294253	chr10:74567788-74567834	ECD	11319	rs10823977	chr10:74506791	P4HA1	4e-15	local	0.0443151
3294242	3294253	chr10:74567788-74567834	ECD	11319	rs12570974	chr10:74510260	P4HA1	2e-40	local	0.159299
3294242	3294253	chr10:74567788-74567834	ECD	11319	rs12242214	chr10:74513082	P4HA1	8e-15	local	0.0446056
3294242	3294253	chr10:74567788-74567834	ECD	11319	rs12242222	chr10:74513131	P4HA1	1e-14	local	0.0438424
3294242	3294253	chr10:74567788-74567834	ECD	11319	rs11000516	chr10:74513968	P4HA1	3e-38	local	0.158109
3294242	3294253	chr10:74567788-74567834	ECD	11319	rs7905836	chr10:74514394	P4HA1	2e-37	local	0.165128
3294242	3294253	chr10:74567788-74567834	ECD	11319	rs7920974	chr10:74514556	P4HA1	4e-38	local	0.159299
3294242	3294253	chr10:74567788-74567834	ECD	11319	rs7078127	chr10:74517639	P4HA1	8e-15	local	0.0446056
3294242	3294253	chr10:74567788-74567834	ECD	11319	rs6480667	chr10:74518879	P4HA1	2e-37	local	0.162768
3294242	3294253	chr10:74567788-74567834	ECD	11319	rs6480668	chr10:74519331	P4HA1	2e-37	local	0.168538
3294242	3294253	chr10:74567788-74567834	ECD	11319	rs7095810	chr10:74524149	P4HA1	3e-51	local	0.147709
3294242	3294253	chr10:74567788-74567834	ECD	11319	rs7918396	chr10:74527552		7e-49	local	0.13482
3294242	3294253	chr10:74567788-74567834	ECD	11319	rs7082363	chr10:74528775		2e-50	local	0.153409
3294242	3294253	chr10:74567788-74567834	ECD	11319	rs7894359	chr10:74534393		2e-50	local	0.152289
3294242	3294253	chr10:74567788-74567834	ECD	11319	rs872457	chr10:74539796	NUDT13	6e-51	local	0.153466
3294242	3294253	chr10:74567788-74567834	ECD	11319	rs2280369	chr10:74540512	NUDT13	6e-51	local	0.153466
3294242	3294253	chr10:74567788-74567834	ECD	11319	rs9971273	chr10:74543751	NUDT13	6e-51	local	0.153466
3294242	3294253	chr10:74567788-74567834	ECD	11319	rs4492736	chr10:74544267	NUDT13	2e-16	local	0.314627
3294242	3294253	chr10:74567788-74567834	ECD	11319	rs7916539	chr10:74548356	NUDT13	6e-51	local	0.153466
3294242	3294253	chr10:74567788-74567834	ECD	11319	rs3829166	chr10:74549379	NUDT13	6e-51	local	0.153466
3294242	3294253	chr10:74567788-74567834	ECD	11319	rs3750734	chr10:74549645	NUDT13	6e-51	local	0.153466
3294242	3294253	chr10:74567788-74567834	ECD	11319	rs7914726	chr10:74553222	NUDT13	4e-50	local	0.149714
3294242	3294253	chr10:74567788-74567834	ECD	11319	rs12569493	chr10:74556048	NUDT13	5e-19	local	0.0360641
3294242	3294253	chr10:74567788-74567834	ECD	11319	rs7072086	chr10:74556603	NUDT13	2e-20	local	0.277532
3294242	3294253	chr10:74567788-74567834	ECD	11319	rs7918236	chr10:74559275	NUDT13	5e-19	local	0.0360641
3294242	3294253	chr10:74567788-74567834	ECD	11319	rs7083730	chr10:74560454	NUDT13	4e-19	local	0.0367707
3294242	3294253	chr10:74567788-74567834	ECD	11319	rs2894215	chr10:74561194	NUDT13	6e-51	local	0.153466
3294242	3294253	chr10:74567788-74567834	ECD	11319	rs7079875	chr10:74563423	ECD	6e-51	local	0.153466
3294242	3294253	chr10:74567788-74567834	ECD	11319	rs7080126	chr10:74563538	ECD	6e-51	local	0.153466
3294242	3294253	chr10:74567788-74567834	ECD	11319	rs7908606	chr10:74563968	ECD	6e-51	local	0.153466
3294242	3294253	chr10:74567788-74567834	ECD	11319	rs2271904	chr10:74564380	ECD	4e-19	local	0.0367707
3294242	3294253	chr10:74567788-74567834	ECD	11319	rs12249189	chr10:74565795	ECD	2e-49	local	0.167224
3294242	3294253	chr10:74567788-74567834	ECD	11319	rs12260168	chr10:74567696	ECD	6e-51	local	0.153466
3294242	3294253	chr10:74567788-74567834	ECD	11319	rs2271905	chr10:74567821	ECD	6e-51	local	0.153466
3294242	3294253	chr10:74567788-74567834	ECD	11319	rs3817395	chr10:74568261	ECD	8e-47	local	0.15348
3294242	3294253	chr10:74567788-74567834	ECD	11319	rs3736518	chr10:74569139	ECD	5e-51	local	0.152093
3294242	3294253	chr10:74567788-74567834	ECD	11319	rs6480671	chr10:74570788	ECD	3e-49	local	0.147709
3294242	3294253	chr10:74567788-74567834	ECD	11319	rs2395012	chr10:74577395	ECD	6e-51	local	0.153466
3294242	3294253	chr10:74567788-74567834	ECD	11319	rs10437380	chr10:74578870	ECD	5e-19	local	0.0360641
3294242	3294253	chr10:74567788-74567834	ECD	11319	rs10437381	chr10:74579160	ECD	4e-47	local	0.140314
3294242	3294253	chr10:74567788-74567834	ECD	11319	rs7072168	chr10:74579587	ECD	1e-50	local	0.152289
3294242	3294253	chr10:74567788-74567834	ECD	11319	rs7069878	chr10:74582009	ECD	3e-50	local	0.159231
3294242	3294253	chr10:74567788-74567834	ECD	11319	rs11000530	chr10:74584261	ECD	4e-50	local	0.149714
3294242	3294253	chr10:74567788-74567834	ECD	11319	rs11000531	chr10:74584307	ECD	2e-49	local	0.153466
3294242	3294253	chr10:74567788-74567834	ECD	11319	rs12240976	chr10:74586007	ECD	4e-19	local	0.0367707
3294242	3294253	chr10:74567788-74567834	ECD	11319	rs12241093	chr10:74586178	ECD	4e-18	local	0.043956
3294242	3294253	chr10:74567788-74567834	ECD	11319	rs12260139	chr10:74590441	ECD	6e-51	local	0.153466
3294242	3294253	chr10:74567788-74567834	ECD	11319	rs7069813	chr10:74591087	ECD	2e-49	local	0.167224
3294242	3294253	chr10:74567788-74567834	ECD	11319	rs7092445	chr10:74591997	ECD	6e-51	local	0.153466
3294242	3294253	chr10:74567788-74567834	ECD	11319	rs719308	chr10:74592632	ECD	1e-43	local	0.123795
3294242	3294253	chr10:74567788-74567834	ECD	11319	rs3812618	chr10:74593137	ECD	6e-51	local	0.153466
3294242	3294253	chr10:74567788-74567834	ECD	11319	rs3812619	chr10:74593567	ECD	3e-44	local	0.159299
3294242	3294253	chr10:74567788-74567834	ECD	11319	rs3763723	chr10:74597489	ECD,FAM149B1	6e-51	local	0.153466
3294242	3294253	chr10:74567788-74567834	ECD	11319	rs7917179	chr10:74601736	FAM149B1	6e-51	local	0.153466
3294242	3294253	chr10:74567788-74567834	ECD	11319	rs12244670	chr10:74602328	FAM149B1	5e-19	local	0.0330189
3294242	3294253	chr10:74567788-74567834	ECD	11319	rs6480675	chr10:74602459	FAM149B1	3e-50	local	0.159231
3294242	3294253	chr10:74567788-74567834	ECD	11319	rs12261221	chr10:74603147	FAM149B1	2e-19	local	0.0367707
3294242	3294253	chr10:74567788-74567834	ECD	11319	rs6480677	chr10:74603207	FAM149B1	4e-45	local	0.126037
3294242	3294253	chr10:74567788-74567834	ECD	11319	rs12256576	chr10:74604319	FAM149B1	6e-51	local	0.153466
3294242	3294253	chr10:74567788-74567834	ECD	11319	rs7923555	chr10:74606315	FAM149B1	6e-51	local	0.153466
3294242	3294253	chr10:74567788-74567834	ECD	11319	rs3750735	chr10:74607511	FAM149B1	4e-50	local	0.149714
3294242	3294253	chr10:74567788-74567834	ECD	11319	rs11000541	chr10:74610086	FAM149B1	6e-51	local	0.153466
3294242	3294253	chr10:74567788-74567834	ECD	11319	rs12268713	chr10:74615744	FAM149B1	6e-51	local	0.153466
3294242	3294253	chr10:74567788-74567834	ECD	11319	rs3998311	chr10:74627901	FAM149B1	1e-39	local	0.120053
3294242	3294253	chr10:74567788-74567834	ECD	11319	rs2394934	chr10:74632979	FAM149B1	3e-38	local	0.132265
3294242	3294253	chr10:74567788-74567834	ECD	11319	rs11000548	chr10:74635901	FAM149B1	1e-38	local	0.123272
3294242	3294253	chr10:74567788-74567834	ECD	11319	rs6480681	chr10:74636769	FAM149B1	2e-15	local	0.0293862
3294242	3294253	chr10:74567788-74567834	ECD	11319	rs2394935	chr10:74639580	FAM149B1	1e-39	local	0.120053
3294242	3294253	chr10:74567788-74567834	ECD	11319	rs6480682	chr10:74646067	FAM149B1	2e-15	local	0.0330189
3294242	3294253	chr10:74567788-74567834	ECD	11319	rs1867565	chr10:74647786	FAM149B1	2e-15	local	0.0330189
3294242	3294253	chr10:74567788-74567834	ECD	11319	rs6480684	chr10:74651297	FAM149B1	2e-34	local	0.118922
3294242	3294253	chr10:74567788-74567834	ECD	11319	rs7913328	chr10:74653295	FAM149B1	2e-15	local	0.0330189
3294242	3294253	chr10:74567788-74567834	ECD	11319	rs11000554	chr10:74655220	FAM149B1	7e-15	local	0.0320379
3294242	3294253	chr10:74567788-74567834	ECD	11319	rs11000555	chr10:74655941	FAM149B1	2e-15	local	0.0330189
3294242	3294253	chr10:74567788-74567834	ECD	11319	rs11000556	chr10:74657183	FAM149B1	5e-15	local	0.0295054
3294242	3294253	chr10:74567788-74567834	ECD	11319	rs11000557	chr10:74657399	FAM149B1	2e-15	local	0.0330189
3294242	3294253	chr10:74567788-74567834	ECD	11319	rs7900359	chr10:74657480	FAM149B1	1e-39	local	0.120053
3294242	3294253	chr10:74567788-74567834	ECD	11319	rs7077186	chr10:74659346	FAM149B1	2e-15	local	0.0330189
3294242	3294253	chr10:74567788-74567834	ECD	11319	rs7093566	chr10:74659455	FAM149B1	2e-15	local	0.0330189
3294242	3294253	chr10:74567788-74567834	ECD	11319	rs12570053	chr10:74660132	FAM149B1	2e-15	local	0.0330189
3294242	3294253	chr10:74567788-74567834	ECD	11319	rs7098383	chr10:74660794	FAM149B1	2e-15	local	0.0330189
3294242	3294253	chr10:74567788-74567834	ECD	11319	rs7068969	chr10:74661566	FAM149B1	3e-37	local	0.120053
3294242	3294253	chr10:74567788-74567834	ECD	11319	rs2292949	chr10:74662988	FAM149B1	7e-14	local	0.0365945
3294242	3294253	chr10:74567788-74567834	ECD	11319	rs957486	chr10:74663889	FAM149B1	2e-15	local	0.0330189
3294242	3294253	chr10:74567788-74567834	ECD	11319	rs3763725	chr10:74670942	DNAJC9,FAM149B1	6e-16	local	0.0367707
3294242	3294253	chr10:74567788-74567834	ECD	11319	rs7100458	chr10:74673098	DNAJC9,FAM149B1	1e-39	local	0.120053
3294242	3294253	chr10:74567788-74567834	ECD	11319	rs12258130	chr10:74675425	DNAJC9	1e-21	local	0.211077
3294242	3294253	chr10:74567788-74567834	ECD	11319	rs14488	chr10:74677280	DNAJC9,MRPS16	1e-14	local	0.0406349
3294242	3294253	chr10:74567788-74567834	ECD	11319	rs16930466	chr10:74677593	MRPS16	9e-15	local	0.0406349
3294242	3294253	chr10:74567788-74567834	ECD	11319	rs2018198	chr10:74679112	MRPS16	7e-09	local	0.0059538
3294242	3294253	chr10:74567788-74567834	ECD	11319	rs6480688	chr10:74684318	TTC18	1e-39	local	0.120053
3294242	3294253	chr10:74567788-74567834	ECD	11319	rs7342113	chr10:74684468	TTC18	9e-15	local	0.0406349
3294242	3294253	chr10:74567788-74567834	ECD	11319	rs16930480	chr10:74685935	TTC18	9e-15	local	0.0406349
3294242	3294253	chr10:74567788-74567834	ECD	11319	rs7915765	chr10:74686857	TTC18	8e-14	local	0.034341
3294242	3294253	chr10:74567788-74567834	ECD	11319	rs11000566	chr10:74691687	TTC18	1e-39	local	0.120053
3294242	3294253	chr10:74567788-74567834	ECD	11319	rs3998306	chr10:74692075	TTC18	5e-14	local	0.0465259
3294242	3294253	chr10:74567788-74567834	ECD	11319	rs4534497	chr10:74692346	TTC18	1e-14	local	0.0374813
3294242	3294253	chr10:74567788-74567834	ECD	11319	rs12250907	chr10:74693253	TTC18	2e-14	local	0.0381988
3294242	3294253	chr10:74567788-74567834	ECD	11319	rs11000569	chr10:74695119	TTC18	1e-15	local	0.0396922
3294242	3294253	chr10:74567788-74567834	ECD	11319	rs11000572	chr10:74695382	TTC18	9e-15	local	0.0406349
3294242	3294253	chr10:74567788-74567834	ECD	11319	rs11000574	chr10:74697214	TTC18	9e-15	local	0.0406349
3294242	3294253	chr10:74567788-74567834	ECD	11319	rs11000576	chr10:74697603	TTC18	1e-39	local	0.120053
3294242	3294253	chr10:74567788-74567834	ECD	11319	rs11000579	chr10:74697967	TTC18	9e-15	local	0.0406349
3294242	3294253	chr10:74567788-74567834	ECD	11319	rs5011505	chr10:74701783	TTC18	5e-14	local	0.0465259
3294242	3294253	chr10:74567788-74567834	ECD	11319	rs11000581	chr10:74702935	TTC18	9e-15	local	0.0406349
3294242	3294253	chr10:74567788-74567834	ECD	11319	rs4294502	chr10:74705262	TTC18	1e-39	local	0.120053
3294242	3294253	chr10:74567788-74567834	ECD	11319	rs4471347	chr10:74706299	TTC18	1e-35	local	0.121465
3294242	3294253	chr10:74567788-74567834	ECD	11319	rs3812621	chr10:74706864	TTC18	4e-14	local	0.0347276
3294242	3294253	chr10:74567788-74567834	ECD	11319	rs11000582	chr10:74710663	TTC18	8e-14	local	0.0324455
3294242	3294253	chr10:74567788-74567834	ECD	11319	rs4291591	chr10:74714842	TTC18	1e-14	local	0.0421705
3294242	3294253	chr10:74567788-74567834	ECD	11319	rs7910573	chr10:74719003	TTC18	9e-15	local	0.0406349
3294242	3294253	chr10:74567788-74567834	ECD	11319	rs7894506	chr10:74719412	TTC18	3e-14	local	0.0286652
3294242	3294253	chr10:74567788-74567834	ECD	11319	rs7073926	chr10:74720163	TTC18	6e-15	local	0.0367491
3294242	3294253	chr10:74567788-74567834	ECD	11319	rs7093096	chr10:74724330	TTC18	9e-15	local	0.0406349
3294242	3294253	chr10:74567788-74567834	ECD	11319	rs11000587	chr10:74724573	TTC18	4e-15	local	0.0381988
3294242	3294253	chr10:74567788-74567834	ECD	11319	rs7068862	chr10:74726528	TTC18	1e-15	local	0.0315008
3294242	3294253	chr10:74567788-74567834	ECD	11319	rs6480691	chr10:74726742	TTC18	7e-15	local	0.0367491
3294242	3294253	chr10:74567788-74567834	ECD	11319	rs6480692	chr10:74726868	TTC18	9e-15	local	0.0406349
3294242	3294253	chr10:74567788-74567834	ECD	11319	rs7096420	chr10:74728362	TTC18	9e-15	local	0.0406349
3294242	3294253	chr10:74567788-74567834	ECD	11319	rs7079020	chr10:74728606	TTC18	5e-14	local	0.0465259
3294242	3294253	chr10:74567788-74567834	ECD	11319	rs10824001	chr10:74729336	TTC18	4e-15	local	0.0319149
3294242	3294253	chr10:74567788-74567834	ECD	11319	rs11000590	chr10:74729505	TTC18	9e-40	local	0.113674
3294242	3294253	chr10:74567788-74567834	ECD	11319	rs12257098	chr10:74729570	TTC18	5e-33	local	0.103482
3294242	3294253	chr10:74567788-74567834	ECD	11319	rs7897627	chr10:74732609	TTC18	9e-15	local	0.0406349
3294242	3294253	chr10:74567788-74567834	ECD	11319	rs11000594	chr10:74734572	TTC18	1e-14	local	0.0398994
3294242	3294253	chr10:74567788-74567834	ECD	11319	rs4498898	chr10:74740166	TTC18	9e-15	local	0.0406349
3294242	3294253	chr10:74567788-74567834	ECD	11319	rs6480694	chr10:74746509	TTC18	3e-37	local	0.120053
3294242	3294253	chr10:74567788-74567834	ECD	11319	rs963036	chr10:74748660	TTC18	1e-13	local	0.0253695
3294242	3294253	chr10:74567788-74567834	ECD	11319	rs2183902	chr10:74749285	TTC18	9e-15	local	0.0406349
3294242	3294253	chr10:74567788-74567834	ECD	11319	rs12240326	chr10:74752964	TTC18	9e-15	local	0.0406349
3294242	3294253	chr10:74567788-74567834	ECD	11319	rs7915330	chr10:74759382	TTC18	3e-13	local	0.0423001
3294242	3294253	chr10:74567788-74567834	ECD	11319	rs11000607	chr10:74759783	TTC18	9e-15	local	0.0406349
3294242	3294253	chr10:74567788-74567834	ECD	11319	rs12259183	chr10:74760825	TTC18	9e-15	local	0.0406349
3294242	3294253	chr10:74567788-74567834	ECD	11319	rs7100955	chr10:74761262	TTC18	5e-14	local	0.0465259
3294242	3294253	chr10:74567788-74567834	ECD	11319	rs2183903	chr10:74762691	TTC18	2e-13	local	0.0319023
3294242	3294253	chr10:74567788-74567834	ECD	11319	rs7910541	chr10:74765258	TTC18	7e-15	local	0.0367491
3294242	3294253	chr10:74567788-74567834	ECD	11319	rs7910669	chr10:74765354	TTC18	9e-15	local	0.0406349
3294242	3294253	chr10:74567788-74567834	ECD	11319	rs12249585	chr10:74766158	TTC18	8e-15	local	0.0421705
3294242	3294253	chr10:74567788-74567834	ECD	11319	rs11000613	chr10:74767313	TTC18	9e-15	local	0.0406349
3294242	3294253	chr10:74567788-74567834	ECD	11319	rs7909456	chr10:74770349	TTC18	2e-14	local	0.0360641
3294242	3294253	chr10:74567788-74567834	ECD	11319	rs4506555	chr10:74771502	TTC18	5e-14	local	0.0465259
3294242	3294253	chr10:74567788-74567834	ECD	11319	rs6480699	chr10:74771634	TTC18	9e-15	local	0.0406349
3294242	3294253	chr10:74567788-74567834	ECD	11319	rs6480700	chr10:74771695	TTC18	1e-14	local	0.0398994
3294242	3294253	chr10:74567788-74567834	ECD	11319	rs12251310	chr10:74772490	TTC18	1e-13	local	0.0379679
3294242	3294253	chr10:74567788-74567834	ECD	11319	rs16930534	chr10:74773512	TTC18	1e-14	local	0.0367707
3294242	3294253	chr10:74567788-74567834	ECD	11319	rs12247890	chr10:74774664	TTC18	2e-15	local	0.0430976
3294242	3294253	chr10:74567788-74567834	ECD	11319	rs3812622	chr10:74778151	TTC18	4e-13	local	0.228659
3294242	3294253	chr10:74567788-74567834	ECD	11319	rs6480703	chr10:74788008	TTC18	7e-39	local	0.125404
3294242	3294253	chr10:74567788-74567834	ECD	11319	rs12261772	chr10:74816816	ANXA7	9e-15	local	0.0406349
3294242	3294253	chr10:74567788-74567834	ECD	11319	rs16930547	chr10:74817584	ANXA7	7e-09	local	0.00818182
3294242	3294253	chr10:74567788-74567834	ECD	11319	rs2234965	chr10:74818121	ANXA7	9e-15	local	0.0406349
3294242	3294253	chr10:74567788-74567834	ECD	11319	rs16930554	chr10:74818581	ANXA7	7e-09	local	0.00818182
3294242	3294253	chr10:74567788-74567834	ECD	11319	rs7096875	chr10:74825685	ANXA7	5e-14	local	0.0465259
3294242	3294253	chr10:74567788-74567834	ECD	11319	rs7100800	chr10:74826002	ANXA7	4e-39	local	0.11605
3294242	3294253	chr10:74567788-74567834	ECD	11319	rs12258241	chr10:74830262	ANXA7	3e-16	local	0.278108
3294242	3294253	chr10:74567788-74567834	ECD	11319	rs11000645	chr10:74832268	ANXA7	2e-14	local	0.0443151
3294242	3294253	chr10:74567788-74567834	ECD	11319	rs7074613	chr10:74832929	ANXA7	9e-15	local	0.0406349
3294242	3294253	chr10:74567788-74567834	ECD	11319	rs3812623	chr10:74843894	ANXA7	4e-40	local	0.120053
3294242	3294253	chr10:74567788-74567834	ECD	11319	rs2297452	chr10:74856617	ZMYND17	3e-16	local	0.278108
3294242	3294253	chr10:74567788-74567834	ECD	11319	rs1332178	chr10:74859591	ZMYND17	1e-39	local	0.120053
3294242	3294253	chr10:74567788-74567834	ECD	11319	rs12644	chr10:74867056	PPP3CB	1e-08	local	0.545199
3294242	3294253	chr10:74567788-74567834	ECD	11319	rs1041532	chr10:74877492	PPP3CB	9e-15	local	0.0406349
3294242	3294253	chr10:74567788-74567834	ECD	11319	rs12245450	chr10:74891290	PPP3CB	1e-39	local	0.120053
3294242	3294253	chr10:74567788-74567834	ECD	11319	rs11000666	chr10:74902999	PPP3CB	1e-39	local	0.120053
3294242	3294253	chr10:74567788-74567834	ECD	11319	rs3763679	chr10:74904831	PPP3CB	1e-39	local	0.120053
3294242	3294253	chr10:74567788-74567834	ECD	11319	rs11000671	chr10:74909982	PPP3CB	3e-34	local	0.0982891
3294242	3294253	chr10:74567788-74567834	ECD	11319	rs7098453	chr10:74931626	USP54	1e-40	local	0.125434
3294242	3294253	chr10:74567788-74567834	ECD	11319	rs7899149	chr10:74933334	USP54	5e-38	local	0.114747
3294242	3294253	chr10:74567788-74567834	ECD	11319	rs12572177	chr10:74955842	USP54	7e-39	local	0.125404
3294242	3294253	chr10:74567788-74567834	ECD	11319	rs12255505	chr10:74959364	USP54	1e-15	local	0.266508
3294242	3294253	chr10:74567788-74567834	ECD	11319	rs4745717	chr10:74975790	USP54	7e-39	local	0.125404
3294242	3294253	chr10:74567788-74567834	ECD	11319	rs2140933	chr10:75003197	USP54	3e-32	local	0.159231
3294242	3294253	chr10:74567788-74567834	ECD	11319	rs7073027	chr10:75013846		4e-32	local	0.153466
3294242	3294253	chr10:74567788-74567834	ECD	11319	rs7899274	chr10:75014766		7e-33	local	0.152289
3294242	3294253	chr10:74567788-74567834	ECD	11319	rs12256735	chr10:75020903		3e-32	local	0.15108
3294242	3294253	chr10:74567788-74567834	ECD	11319	rs7097343	chr10:75031794		3e-32	local	0.159231
3294242	3294253	chr10:74567788-74567834	ECD	11319	rs11000723	chr10:75054987		5e-32	local	0.148556
3294242	3294253	chr10:74567788-74567834	ECD	11319	rs7080436	chr10:75061183	MYOZ1	3e-15	local	0.0345977
3294242	3294253	chr10:74567788-74567834	ECD	11319	rs502233	chr3:171925415		2e-09	distant	0.002
3294242	3294253	chr10:74567788-74567834	ECD	11319	rs1821685	chr4:28920241		3e-08	distant	0.0419703
3301218	3301223	chr10:96987387-96987436	PDLIM1	9124	rs752415	chr10:96846617		3e-08	local	0.00222995
3301218	3301223	chr10:96987387-96987436	PDLIM1	9124	rs752416	chr10:96846674		2e-08	local	0.0689675
3301218	3301223	chr10:96987387-96987436	PDLIM1	9124	rs943313	chr10:96847243		4e-09	local	0.0121382
3301218	3301223	chr10:96987387-96987436	PDLIM1	9124	rs10882534	chr10:96848241		2e-08	local	0.0119523
3301218	3301223	chr10:96987387-96987436	PDLIM1	9124	rs4553304	chr10:96849294		3e-08	local	0.01041
3301218	3301223	chr10:96987387-96987436	PDLIM1	9124	rs6583978	chr10:96851778		2e-08	local	0.0117369
3301218	3301223	chr10:96987387-96987436	PDLIM1	9124	rs7902042	chr10:96854204		2e-08	local	0.0121773
3301218	3301223	chr10:96987387-96987436	PDLIM1	9124	rs7079861	chr10:96866833		2e-08	local	0.0121773
3301218	3301223	chr10:96987387-96987436	PDLIM1	9124	rs10786190	chr10:96871482		1e-08	local	0.0100028
3301218	3301223	chr10:96987387-96987436	PDLIM1	9124	rs7084271	chr10:96876626		1e-08	local	0.0405955
3301218	3301223	chr10:96987387-96987436	PDLIM1	9124	rs617848	chr10:96893145		6e-09	local	0.0485752
3301218	3301223	chr10:96987387-96987436	PDLIM1	9124	rs2478478	chr10:96921699		3e-08	local	0.0156261
3301218	3301223	chr10:96987387-96987436	PDLIM1	9124	rs597768	chr10:96931380		2e-08	local	0.043956
3301218	3301223	chr10:96987387-96987436	PDLIM1	9124	rs626415	chr10:96939531		2e-08	local	0.0117369
3301218	3301223	chr10:96987387-96987436	PDLIM1	9124	rs669360	chr10:96958635	C10orf129	6e-09	local	0.0114716
3301218	3301223	chr10:96987387-96987436	PDLIM1	9124	rs11598953	chr10:96984938		2e-09	local	0.155327
3301218	3301223	chr10:96987387-96987436	PDLIM1	9124	rs7909072	chr10:96985960	PDLIM1	2e-08	local	0.0927872
3301218	3301223	chr10:96987387-96987436	PDLIM1	9124	rs12764831	chr10:96987156	PDLIM1	8e-10	local	0.077744
3301218	3301223	chr10:96987387-96987436	PDLIM1	9124	rs1049989	chr10:96987468	PDLIM1	3e-20	local	0.203916
3301218	3301223	chr10:96987387-96987436	PDLIM1	9124	rs11188246	chr10:96991113	PDLIM1	4e-19	local	0.213404
3301218	3301223	chr10:96987387-96987436	PDLIM1	9124	rs11781983	chr8:128730402		3e-09	distant	0.0868985
3348852	3348885	chr11:111438632-111439581	DLAT	1737	rs7570842	chr2:10944160		1e-08	distant	0.36
3393200	3393213	chr11:116583897-116583966	PCSK7	9159	rs4938349	chr11:116527132	PAFAH1B2	3e-13	local	0.278961
3393200	3393213	chr11:116583897-116583966	PCSK7	9159	rs1871757	chr11:116535790	PAFAH1B2	1e-09	local	0.123461
3393200	3393213	chr11:116583897-116583966	PCSK7	9159	rs3736120	chr11:116537334	PAFAH1B2	3e-14	local	0.281141
3393200	3393213	chr11:116583897-116583966	PCSK7	9159	rs10790175	chr11:116539938	PAFAH1B2	2e-11	local	0.344973
3393200	3393213	chr11:116583897-116583966	PCSK7	9159	rs4938353	chr11:116551406		4e-09	local	0.188773
3393200	3393213	chr11:116583897-116583966	PCSK7	9159	rs10790177	chr11:116553626	SIDT2	2e-13	local	0.281803
3393200	3393213	chr11:116583897-116583966	PCSK7	9159	rs4938354	chr11:116556374	SIDT2	2e-13	local	0.284333
3393200	3393213	chr11:116583897-116583966	PCSK7	9159	rs7946257	chr11:116558374	SIDT2	7e-13	local	0.263042
3393200	3393213	chr11:116583897-116583966	PCSK7	9159	rs7107152	chr11:116561289	SIDT2	4e-13	local	0.284333
3393200	3393213	chr11:116583897-116583966	PCSK7	9159	rs474339	chr11:116564761	SIDT2	5e-15	local	0.279428
3393200	3393213	chr11:116583897-116583966	PCSK7	9159	rs521171	chr11:116569902	SIDT2	3e-14	local	0.271164
3394123	3394161	chr11:118430484-118430578	HYOU1	10525	rs3759012	chr11:118406471	SLC37A4	1e-19	local	0.000337581
3394123	3394161	chr11:118430484-118430578	HYOU1	10525	rs1784559	chr11:118406823	SLC37A4	8e-14	local	0.0106746
3394123	3394161	chr11:118430484-118430578	HYOU1	10525	rs10892322	chr11:118407958		6e-20	local	0.00111142
3394123	3394161	chr11:118430484-118430578	HYOU1	10525	rs10892323	chr11:118407967		5e-18	local	0.000278087
3394123	3394161	chr11:118430484-118430578	HYOU1	10525	rs11217129	chr11:118408050		2e-17	local	0.0034144
3394123	3394161	chr11:118430484-118430578	HYOU1	10525	rs1003081	chr11:118419202	HYOU1	3e-11	local	0.0712772
3394123	3394161	chr11:118430484-118430578	HYOU1	10525	rs13929	chr11:118420964	HYOU1	4e-11	local	0.0286111
3394123	3394161	chr11:118430484-118430578	HYOU1	10525	rs1043314	chr11:118421153	HYOU1	3e-24	local	6.17939e-05
3394123	3394161	chr11:118430484-118430578	HYOU1	10525	rs2276060	chr11:118424341	HYOU1	7e-46	local	0.0849814
3394123	3394161	chr11:118430484-118430578	HYOU1	10525	rs538478	chr11:118430550	HYOU1	2e-50	local	0.10125
3394123	3394161	chr11:118430484-118430578	HYOU1	10525	rs1614264	chr11:118447847	VPS11	8e-12	local	0.123597
3394123	3394161	chr11:118430484-118430578	HYOU1	10525	rs540261	chr11:118452843	VPS11	2e-23	local	0.107634
3394123	3394161	chr11:118430484-118430578	HYOU1	10525	rs2508948	chr11:118456851	VPS11	7e-17	local	0.0182857
3394123	3394161	chr11:118430484-118430578	HYOU1	10525	rs4614	chr11:118457580	VPS11	1e-08	local	0.0227273
3394123	3394161	chr11:118430484-118430578	HYOU1	10525	rs7127212	chr11:118458411		4e-11	local	0.113524
3394123	3394161	chr11:118430484-118430578	HYOU1	10525	rs592190	chr11:118460523	HMBS	2e-35	local	0.195818
3394123	3394161	chr11:118430484-118430578	HYOU1	10525	rs1799993	chr11:118463336	HMBS	3e-16	local	0.186331
3394123	3394161	chr11:118430484-118430578	HYOU1	10525	rs1006195	chr11:118464078	HMBS	2e-08	local	0.0348428
3394123	3394161	chr11:118430484-118430578	HYOU1	10525	rs17075	chr11:118464540	HMBS	3e-21	local	0.0710456
3394123	3394161	chr11:118430484-118430578	HYOU1	10525	rs494048	chr11:118466440	HMBS	2e-14	local	0.065978
3394123	3394161	chr11:118430484-118430578	HYOU1	10525	rs682795	chr11:118488890	TMEM24	1e-08	local	0.0941062
3394123	3394161	chr11:118430484-118430578	HYOU1	10525	rs10495727	chr2:22760720		3e-08	distant	0.0766025
3322717	3322759	chr11:18344426-18344512	GTF2H1	2965	rs3802967	chr11:18300639	GTF2H1,HPS5	3e-09	local	0.34943
3322717	3322759	chr11:18344426-18344512	GTF2H1	2965	rs4150581	chr11:18313845	GTF2H1	6e-09	local	0.375384
3322717	3322759	chr11:18344426-18344512	GTF2H1	2965	rs4150606	chr11:18320144	GTF2H1	1e-09	local	0.342519
3322717	3322759	chr11:18344426-18344512	GTF2H1	2965	rs4150628	chr11:18322443	GTF2H1	1e-09	local	0.331505
3322717	3322759	chr11:18344426-18344512	GTF2H1	2965	rs4596	chr11:18344703	GTF2H1	6e-10	local	0.363859
3366519	3366525	chr11:22602344-22602651	FANCF	2188	rs17533238	chr2:201209675	AOX1	5e-09	distant	0.0258807
3366519	3366525	chr11:22602344-22602651	FANCF	2188	rs17533245	chr2:201210316	AOX1	7e-09	distant	0.0258807
3359529	3359546	chr11:2984686-2984735	CARS	833	rs2071110	chr11:2947794	NAP1L4	5e-12	local	0.0802652
3359529	3359546	chr11:2984686-2984735	CARS	833	rs3814964	chr11:2956082	NAP1L4	7e-12	local	0.0689009
3359529	3359546	chr11:2984686-2984735	CARS	833	rs756693	chr11:2984464	CARS	6e-11	local	0.0602849
3359529	3359546	chr11:2984686-2984735	CARS	833	rs7481584	chr11:2985664	CARS	3e-12	local	0.0754988
3359529	3359546	chr11:2984686-2984735	CARS	833	rs2718581	chr2:87306757		1e-08	distant	0.015873
3368707	3368723	chr11:33686370-33687519	CD59	966	rs12647861	chr4:57726635		8e-09	distant	0.00456572
3368707	3368723	chr11:33686370-33687519	CD59	966	rs7654584	chr4:57727604		3e-08	distant	0.0113241
3373724	3373765	chr11:56859253-56859284	SSRP1	6749	rs442266	chr5:148764170		1e-09	distant	0.00686499
3373724	3373768	chr11:56859781-56859831	SSRP1	6749	rs2662879	chr7:85320470		3e-08	distant	7.76458e-05
3373724	3373768	chr11:56859781-56859831	SSRP1	6749	rs1509076	chr7:85321178		3e-08	distant	7.76458e-05
3333711	3333716	chr11:62394840-62394885	SLC3A2	6520	rs3763851	chr11:62329008	NXF1,STX5	1e-14	local	0.350523
3333711	3333716	chr11:62394840-62394885	SLC3A2	6520	rs7948536	chr11:62343468	STX5	1e-14	local	0.348552
3333711	3333716	chr11:62394840-62394885	SLC3A2	6520	rs4034	chr11:62376204		4e-09	local	0.109516
3340589	3340610	chr11:74960935-74961016	SERPINH1	871	rs651581	chr11:74955639	SERPINH1	5e-10	local	0.252154
3340589	3340610	chr11:74960935-74961016	SERPINH1	871	rs646474	chr11:74957094	SERPINH1	1e-10	local	0.256378
3340589	3340610	chr11:74960935-74961016	SERPINH1	871	rs639939	chr11:74961562	SERPINH1	4e-09	local	0.083082
3430894	3430912	chr12:107994508-107994538	USP30	84749	rs2272520	chr2:18575129		3e-08	distant	0.00167442
3471374	3471385	chr12:109644367-109644437	PPP1CC	5501	rs11829777	chr12:108988152	FLJ40142	3e-08	local	0.371333
3471374	3471385	chr12:109644367-109644437	PPP1CC	5501	rs11064912	chr12:108990081	FLJ40142	3e-08	local	0.371333
3471374	3471385	chr12:109644367-109644437	PPP1CC	5501	rs11065631	chr12:109262765	ATP2A2	2e-09	local	0.0177134
3471374	3471385	chr12:109644367-109644437	PPP1CC	5501	rs17792048	chr12:109350925		5e-10	local	0.0205597
3471374	3471385	chr12:109644367-109644437	PPP1CC	5501	rs4766492	chr12:109413643	VPS29	2e-08	local	0.16684
3471374	3471385	chr12:109644367-109644437	PPP1CC	5501	rs16940881	chr12:109422200	VPS29	2e-14	local	0.0711579
3471374	3471385	chr12:109644367-109644437	PPP1CC	5501	rs16940885	chr12:109456048	PPTC7	6e-12	local	0.0761885
3471374	3471385	chr12:109644367-109644437	PPP1CC	5501	rs3825390	chr12:109460791	PPTC7	6e-18	local	0.160053
3471374	3471385	chr12:109644367-109644437	PPP1CC	5501	rs12311093	chr12:109462414	PPTC7	9e-26	local	0.225647
3471374	3471385	chr12:109644367-109644437	PPP1CC	5501	rs11065663	chr12:109473268	PPTC7	1e-13	local	0.105171
3471374	3471385	chr12:109644367-109644437	PPP1CC	5501	rs4766500	chr12:109478173	PPTC7	8e-10	local	0.169778
3471374	3471385	chr12:109644367-109644437	PPP1CC	5501	rs16940909	chr12:109538973	TCTN1	5e-18	local	0.12124
3471374	3471385	chr12:109644367-109644437	PPP1CC	5501	rs9783428	chr12:109552478	TCTN1	7e-09	local	0.0542594
3471374	3471385	chr12:109644367-109644437	PPP1CC	5501	rs17682012	chr12:109578836	HVCN1	2e-09	local	0.0648364
3471374	3471385	chr12:109644367-109644437	PPP1CC	5501	rs16940933	chr12:109586956	HVCN1	4e-11	local	0.0602849
3471374	3471385	chr12:109644367-109644437	PPP1CC	5501	rs16940935	chr12:109591852	HVCN1	4e-13	local	0.0542358
3471374	3471385	chr12:109644367-109644437	PPP1CC	5501	rs871921	chr12:109599495	HVCN1	2e-28	local	0.240544
3471374	3471385	chr12:109644367-109644437	PPP1CC	5501	rs1018134	chr12:109605501	HVCN1	3e-15	local	0.0976259
3471374	3471385	chr12:109644367-109644437	PPP1CC	5501	rs16940950	chr12:109620841		4e-17	local	0.0833449
3471374	3471385	chr12:109644367-109644437	PPP1CC	5501	rs10774603	chr12:109640329	PPP1CC	2e-14	local	0.16
3471374	3471385	chr12:109644367-109644437	PPP1CC	5501	rs1050587	chr12:109642543	PPP1CC	1e-19	local	0.107033
3471374	3471385	chr12:109644367-109644437	PPP1CC	5501	rs1973505	chr12:109644385	PPP1CC	7e-37	local	0.227813
3471374	3471385	chr12:109644367-109644437	PPP1CC	5501	rs7960552	chr12:109648619	PPP1CC	2e-14	local	0.16
3471374	3471385	chr12:109644367-109644437	PPP1CC	5501	rs7960749	chr12:109648751	PPP1CC	7e-24	local	0.12
3471374	3471385	chr12:109644367-109644437	PPP1CC	5501	rs7301623	chr12:109655285	PPP1CC	5e-24	local	0.124394
3471374	3471385	chr12:109644367-109644437	PPP1CC	5501	rs7301769	chr12:109655408	PPP1CC	5e-24	local	0.12
3471374	3471385	chr12:109644367-109644437	PPP1CC	5501	rs1107652	chr12:109660595	PPP1CC	5e-24	local	0.12
3471374	3471385	chr12:109644367-109644437	PPP1CC	5501	rs4073472	chr12:109660876	PPP1CC	1e-09	local	0.0359245
3471374	3471385	chr12:109644367-109644437	PPP1CC	5501	rs9706102	chr12:109669773		4e-10	local	0.0565757
3471374	3471385	chr12:109644367-109644437	PPP1CC	5501	rs9300316	chr12:109680586		4e-09	local	0.0168641
3471374	3471385	chr12:109644367-109644437	PPP1CC	5501	rs11830452	chr12:109682958		1e-09	local	0.0585106
3471374	3471385	chr12:109644367-109644437	PPP1CC	5501	rs16940992	chr12:109691897		5e-17	local	0.181199
3471374	3471385	chr12:109644367-109644437	PPP1CC	5501	rs17683336	chr12:109697094		4e-09	local	0.0168641
3471374	3471385	chr12:109644367-109644437	PPP1CC	5501	rs11065719	chr12:109697144		4e-09	local	0.153413
3471374	3471385	chr12:109644367-109644437	PPP1CC	5501	rs17793540	chr12:109699957		7e-09	local	0.0126993
3471374	3471385	chr12:109644367-109644437	PPP1CC	5501	rs7975139	chr12:109705513		3e-10	local	0.0583177
3432438	3432457	chr12:111839916-111839940	OAS1	4938	rs10492028	chr12:111821545		1e-10	local	0.191828
3432438	3432457	chr12:111839916-111839940	OAS1	4938	rs11066443	chr12:111822113		8e-15	local	0.265047
3432438	3432457	chr12:111839916-111839940	OAS1	4938	rs10774670	chr12:111826544		2e-10	local	0.336307
3432438	3432457	chr12:111839916-111839940	OAS1	4938	rs10744785	chr12:111829638	OAS1	4e-15	local	0.261872
3432438	3432457	chr12:111839916-111839940	OAS1	4938	rs3741981	chr12:111833252	OAS1	8e-13	local	0.215563
3432438	3432457	chr12:111839916-111839940	OAS1	4938	rs10774671	chr12:111841575	OAS1	2e-35	local	0.115207
3432438	3432457	chr12:111839916-111839940	OAS1	4938	rs10850097	chr12:111845499		5e-13	local	0.0175162
3432438	3432457	chr12:111839916-111839940	OAS1	4938	rs7134391	chr12:111851073		1e-12	local	0.0227219
3432438	3432458	chr12:111840000-111840094	OAS1	4938	rs10492028	chr12:111821545		8e-10	local	0.191828
3432438	3432458	chr12:111840000-111840094	OAS1	4938	rs11066443	chr12:111822113		5e-13	local	0.265047
3432438	3432458	chr12:111840000-111840094	OAS1	4938	rs10774670	chr12:111826544		2e-09	local	0.336307
3432438	3432458	chr12:111840000-111840094	OAS1	4938	rs10744785	chr12:111829638	OAS1	7e-15	local	0.261872
3432438	3432458	chr12:111840000-111840094	OAS1	4938	rs4766662	chr12:111830081	OAS1	1e-09	local	0.136153
3432438	3432458	chr12:111840000-111840094	OAS1	4938	rs3741981	chr12:111833252	OAS1	1e-20	local	0.215563
3432438	3432458	chr12:111840000-111840094	OAS1	4938	rs10774671	chr12:111841575	OAS1	3e-54	local	0.115207
3432438	3432458	chr12:111840000-111840094	OAS1	4938	rs10850097	chr12:111845499		4e-19	local	0.0175162
3432438	3432458	chr12:111840000-111840094	OAS1	4938	rs7134391	chr12:111851073		1e-16	local	0.0227219
3432438	3432462	chr12:111841632-111841664	OAS1	4938	rs11066443	chr12:111822113		3e-10	local	0.265047
3432438	3432462	chr12:111841632-111841664	OAS1	4938	rs10744785	chr12:111829638	OAS1	5e-10	local	0.261872
3432438	3432462	chr12:111841632-111841664	OAS1	4938	rs3741981	chr12:111833252	OAS1	6e-22	local	0.215563
3432438	3432462	chr12:111841632-111841664	OAS1	4938	rs2285934	chr12:111835902	OAS1	1e-14	local	0.0514292
3432438	3432462	chr12:111841632-111841664	OAS1	4938	rs10774671	chr12:111841575	OAS1	3e-39	local	0.115207
3432438	3432462	chr12:111841632-111841664	OAS1	4938	rs10850097	chr12:111845499		1e-15	local	0.0175162
3432438	3432462	chr12:111841632-111841664	OAS1	4938	rs7134391	chr12:111851073		3e-12	local	0.0227219
3432438	3432462	chr12:111841632-111841664	OAS1	4938	rs10774679	chr12:111859130	OAS3	3e-10	local	0.0598599
3432438	3432462	chr12:111841632-111841664	OAS1	4938	rs2269899	chr12:111866338	OAS3	3e-10	local	0.00759215
3432438	3432463	chr12:111841767-111842054	OAS1	4938	rs3741981	chr12:111833252	OAS1	5e-14	local	0.215563
3432438	3432463	chr12:111841767-111842054	OAS1	4938	rs2285934	chr12:111835902	OAS1	1e-08	local	0.0514292
3432438	3432463	chr12:111841767-111842054	OAS1	4938	rs10774671	chr12:111841575	OAS1	7e-20	local	0.115207
3432438	3432463	chr12:111841767-111842054	OAS1	4938	rs10850097	chr12:111845499		5e-09	local	0.0175162
3432514	3432519	chr12:111909510-111909567	OAS2	4939	rs2010604	chr12:111892590	OAS3	6e-10	local	0.0997344
3474697	3474728	chr12:119705869-119705938	SPPL3	121665	rs4237755	chr11:5891312		7e-09	distant	0.0353434
3474697	3474728	chr12:119705869-119705938	SPPL3	121665	rs660878	chr12:119674015		2e-09	local	0.1236
3474697	3474728	chr12:119705869-119705938	SPPL3	121665	rs4638383	chr12:119674684		1e-16	local	0.136799
3474697	3474728	chr12:119705869-119705938	SPPL3	121665	rs7133413	chr12:119679389		4e-23	local	0.107037
3474697	3474728	chr12:119705869-119705938	SPPL3	121665	rs668622	chr12:119682681		1e-11	local	0.00707014
3474697	3474728	chr12:119705869-119705938	SPPL3	121665	rs508595	chr12:119683273		2e-09	local	1.64419e-06
3474697	3474728	chr12:119705869-119705938	SPPL3	121665	rs13746	chr12:119685549	UNQ1887	7e-10	local	0.000282506
3474697	3474728	chr12:119705869-119705938	SPPL3	121665	rs9431	chr12:119687046	UNQ1887	3e-09	local	0.00111111
3474697	3474728	chr12:119705869-119705938	SPPL3	121665	rs3213571	chr12:119688750	UNQ1887	5e-18	local	0.171875
3474697	3474728	chr12:119705869-119705938	SPPL3	121665	rs11065259	chr12:119689986	UNQ1887	1e-14	local	0.074456
3474697	3474728	chr12:119705869-119705938	SPPL3	121665	rs708784	chr12:119692866	UNQ1887	1e-08	local	0.112979
3474697	3474728	chr12:119705869-119705938	SPPL3	121665	rs10849786	chr12:119693684	UNQ1887	1e-12	local	0.0854431
3474697	3474728	chr12:119705869-119705938	SPPL3	121665	rs10849788	chr12:119696223	UNQ1887	5e-16	local	0.173107
3474697	3474728	chr12:119705869-119705938	SPPL3	121665	rs10437838	chr12:119696296	UNQ1887	5e-18	local	0.171875
3474697	3474728	chr12:119705869-119705938	SPPL3	121665	rs3213568	chr12:119706878	UNQ1887	5e-18	local	0.171875
3474697	3474728	chr12:119705869-119705938	SPPL3	121665	rs6489780	chr12:119712792	UNQ1887	5e-18	local	0.171875
3474697	3474728	chr12:119705869-119705938	SPPL3	121665	rs639343	chr12:119713951	UNQ1887	3e-08	local	0.111693
3474697	3474728	chr12:119705869-119705938	SPPL3	121665	rs581515	chr12:119717632	UNQ1887	3e-08	local	0.108061
3474697	3474728	chr12:119705869-119705938	SPPL3	121665	rs1039302	chr12:119720640	UNQ1887	5e-14	local	0.0810383
3474697	3474728	chr12:119705869-119705938	SPPL3	121665	rs519785	chr12:119723317	UNQ1887	3e-08	local	0.122551
3474697	3474728	chr12:119705869-119705938	SPPL3	121665	rs10774568	chr12:119724078	UNQ1887	6e-14	local	0.086766
3474697	3474728	chr12:119705869-119705938	SPPL3	121665	rs11065270	chr12:119725244	UNQ1887	5e-24	local	0.114711
3474697	3474728	chr12:119705869-119705938	SPPL3	121665	rs10774569	chr12:119726902	UNQ1887	5e-18	local	0.171875
3474697	3474728	chr12:119705869-119705938	SPPL3	121665	rs2393718	chr12:119727921	UNQ1887	1e-16	local	0.151111
3474697	3474728	chr12:119705869-119705938	SPPL3	121665	rs6489782	chr12:119731873	UNQ1887	3e-15	local	0.077442
3474697	3474728	chr12:119705869-119705938	SPPL3	121665	rs671815	chr12:119733386	UNQ1887	2e-09	local	0.129032
3474697	3474728	chr12:119705869-119705938	SPPL3	121665	rs11829904	chr12:119742093	UNQ1887	3e-20	local	0.124884
3474697	3474728	chr12:119705869-119705938	SPPL3	121665	rs7135147	chr12:119744366	UNQ1887	1e-13	local	0.0772063
3474697	3474728	chr12:119705869-119705938	SPPL3	121665	rs582678	chr12:119755605	UNQ1887	2e-09	local	0.127685
3474697	3474728	chr12:119705869-119705938	SPPL3	121665	rs531782	chr12:119757629	UNQ1887	2e-10	local	6.95652e-05
3474697	3474728	chr12:119705869-119705938	SPPL3	121665	rs1027556	chr12:119759731	UNQ1887	7e-18	local	0.171255
3474697	3474728	chr12:119705869-119705938	SPPL3	121665	rs7977343	chr12:119760024	UNQ1887	7e-11	local	0.201871
3474697	3474728	chr12:119705869-119705938	SPPL3	121665	rs625228	chr12:119762648	UNQ1887	9e-11	local	0.00480338
3474697	3474728	chr12:119705869-119705938	SPPL3	121665	rs7965332	chr12:119764294	UNQ1887	1e-17	local	0.170614
3474697	3474728	chr12:119705869-119705938	SPPL3	121665	rs10431387	chr12:119765221	UNQ1887	5e-18	local	0.171875
3474697	3474728	chr12:119705869-119705938	SPPL3	121665	rs661647	chr12:119767041	UNQ1887	3e-09	local	0.000647163
3474697	3474728	chr12:119705869-119705938	SPPL3	121665	rs471688	chr12:119769806	UNQ1887	3e-10	local	7.98885e-08
3474697	3474728	chr12:119705869-119705938	SPPL3	121665	rs10774571	chr12:119770518	UNQ1887	5e-18	local	0.171875
3474697	3474728	chr12:119705869-119705938	SPPL3	121665	rs715319	chr12:119772315	UNQ1887	5e-18	local	0.171875
3474697	3474728	chr12:119705869-119705938	SPPL3	121665	rs11065298	chr12:119781487	UNQ1887	5e-18	local	0.171875
3474697	3474728	chr12:119705869-119705938	SPPL3	121665	rs610694	chr12:119789208	UNQ1887	7e-10	local	6.94879e-05
3474697	3474728	chr12:119705869-119705938	SPPL3	121665	rs648262	chr12:119794444	UNQ1887	6e-09	local	0.118249
3474697	3474728	chr12:119705869-119705938	SPPL3	121665	rs10849810	chr12:119802479	UNQ1887	2e-17	local	0.183391
3474697	3474728	chr12:119705869-119705938	SPPL3	121665	rs1177585	chr12:119809703	UNQ1887	1e-09	local	6.94879e-05
3474697	3474728	chr12:119705869-119705938	SPPL3	121665	rs10849811	chr12:119811643	UNQ1887	5e-18	local	0.171875
3474697	3474728	chr12:119705869-119705938	SPPL3	121665	rs7139145	chr12:119812005	UNQ1887	5e-18	local	0.171875
3474697	3474728	chr12:119705869-119705938	SPPL3	121665	rs7298639	chr12:119813144	UNQ1887	5e-18	local	0.171875
3474697	3474728	chr12:119705869-119705938	SPPL3	121665	rs3809314	chr12:119814468	UNQ1887	5e-18	local	0.171875
3474697	3474728	chr12:119705869-119705938	SPPL3	121665	rs1151862	chr12:119815667	UNQ1887	3e-10	local	0.000307616
3474697	3474728	chr12:119705869-119705938	SPPL3	121665	rs1151860	chr12:119818446	UNQ1887	2e-08	local	0.111387
3474697	3474728	chr12:119705869-119705938	SPPL3	121665	rs11065322	chr12:119820645	UNQ1887	3e-18	local	0.164787
3474697	3474728	chr12:119705869-119705938	SPPL3	121665	rs1151849	chr12:119824981	UNQ1887	7e-10	local	6.94879e-05
3474697	3474728	chr12:119705869-119705938	SPPL3	121665	rs868795	chr12:119855615		1e-09	local	0.0300858
3474697	3474728	chr12:119705869-119705938	SPPL3	121665	rs10849822	chr12:119861876		2e-08	local	0.0380146
3474697	3474728	chr12:119705869-119705938	SPPL3	121665	rs10846935	chr12:124692335	TMEM132B	9e-09	distant	0.0059538
3474697	3474728	chr12:119705869-119705938	SPPL3	121665	rs868865	chr20:59746886	CDH4,LOC100131417	2e-08	distant	0.0242588
3474697	3474728	chr12:119705869-119705938	SPPL3	121665	rs17217102	chr3:161389019		6e-09	distant	0.00306741
3474697	3474728	chr12:119705869-119705938	SPPL3	121665	rs17161932	chr7:140474061	LOC100129514	3e-08	distant	0.000634921
3474697	3474728	chr12:119705869-119705938	SPPL3	121665	rs11768167	chr7:140480927	LOC100129514	3e-08	distant	0.000634921
3479355	3479420	chr12:131903343-131903382	GOLGA3	2802	rs2625219	chr1:203172466	NFASC	6e-09	distant	0.0583504
3479355	3479420	chr12:131903343-131903382	GOLGA3	2802	rs1839323	chr1:203172821	NFASC	6e-09	distant	0.0527979
3479355	3479420	chr12:131903343-131903382	GOLGA3	2802	rs2595953	chr1:203172856	NFASC	1e-08	distant	0.0533927
3479355	3479420	chr12:131903343-131903382	GOLGA3	2802	rs2595952	chr1:203173018	NFASC	7e-09	distant	0.0600142
3479355	3479420	chr12:131903343-131903382	GOLGA3	2802	rs2802814	chr1:203173544	NFASC	6e-09	distant	0.0589957
3479355	3479420	chr12:131903343-131903382	GOLGA3	2802	rs2802816	chr1:203173619	NFASC	2e-08	distant	0.0539077
3479355	3479420	chr12:131903343-131903382	GOLGA3	2802	rs2802817	chr1:203173665	NFASC	7e-09	distant	0.0600142
3479355	3479420	chr12:131903343-131903382	GOLGA3	2802	rs2802818	chr1:203173696	NFASC	7e-09	distant	0.0566608
3479355	3479420	chr12:131903343-131903382	GOLGA3	2802	rs2595949	chr1:203174594	NFASC	6e-09	distant	0.0560488
3479355	3479420	chr12:131903343-131903382	GOLGA3	2802	rs2625217	chr1:203174612	NFASC	7e-09	distant	0.0600142
3479355	3479420	chr12:131903343-131903382	GOLGA3	2802	rs2595965	chr1:203175680	NFASC	7e-09	distant	0.0600142
3479355	3479420	chr12:131903343-131903382	GOLGA3	2802	rs4758888	chr12:131973581	CHFR	1e-14	local	0.0790036
3479355	3479420	chr12:131903343-131903382	GOLGA3	2802	rs2042955	chr5:13497173		9e-09	distant	0.177078
3479355	3479420	chr12:131903343-131903382	GOLGA3	2802	rs27548	chr5:58562827	PDE4D	1e-08	distant	0.0110582
3479355	3479420	chr12:131903343-131903382	GOLGA3	2802	rs27723	chr5:58599988	PDE4D	3e-08	distant	0.0154776
3479355	3479420	chr12:131903343-131903382	GOLGA3	2802	rs26711	chr5:58600309	PDE4D	3e-09	distant	0.0112899
3414390	3414417	chr12:48780269-48780556	SMARCD1	6602	rs8013361	chr14:65483142		7e-09	distant	0.0342195
3457455	3457470	chr12:54845690-54845732	SMARCC2	6601	rs2175303	chr18:7218867		3e-08	distant	0.135658
3457824	3457837	chr12:55100877-55100932	TIMELESS	8914	rs812279	chr12:55100836	TIMELESS	4e-14	local	0.0035073
3457824	3457837	chr12:55100877-55100932	TIMELESS	8914	rs2291739	chr12:55100919	TIMELESS	1e-27	local	0.084232
3457824	3457837	chr12:55100877-55100932	TIMELESS	8914	rs774047	chr12:55102188	TIMELESS	2e-11	local	0.121186
3457824	3457837	chr12:55100877-55100932	TIMELESS	8914	rs774027	chr12:55108644	TIMELESS	3e-11	local	0.0835699
3457824	3457837	chr12:55100877-55100932	TIMELESS	8914	rs703829	chr12:55109888	TIMELESS	3e-11	local	0.0812432
3457824	3457837	chr12:55100877-55100932	TIMELESS	8914	rs774033	chr12:55111577	TIMELESS	3e-11	local	0.0835699
3457824	3457837	chr12:55100877-55100932	TIMELESS	8914	rs774034	chr12:55112003	TIMELESS	5e-11	local	0.0736757
3457824	3457837	chr12:55100877-55100932	TIMELESS	8914	rs774035	chr12:55112015	TIMELESS	4e-11	local	0.0789973
3457824	3457837	chr12:55100877-55100932	TIMELESS	8914	rs774036	chr12:55112045	TIMELESS	2e-11	local	0.0998826
3457824	3457837	chr12:55100877-55100932	TIMELESS	8914	rs774039	chr12:55112247	TIMELESS	3e-11	local	0.0835699
3457824	3457837	chr12:55100877-55100932	TIMELESS	8914	rs2279665	chr12:55113960	TIMELESS	9e-13	local	0.0160268
3457824	3457837	chr12:55100877-55100932	TIMELESS	8914	rs7312888	chr12:55114814	TIMELESS	5e-19	local	0.0228105
3457824	3457837	chr12:55100877-55100932	TIMELESS	8914	rs7977477	chr12:55114886	TIMELESS	2e-12	local	0.0180405
3457824	3457837	chr12:55100877-55100932	TIMELESS	8914	rs11833581	chr12:55115084	TIMELESS	5e-11	local	0.0184165
3457824	3457837	chr12:55100877-55100932	TIMELESS	8914	rs10876889	chr12:55115417	TIMELESS	7e-13	local	0.0317275
3457824	3457837	chr12:55100877-55100932	TIMELESS	8914	rs11171850	chr12:55117371	TIMELESS	4e-12	local	0.0182857
3457824	3457837	chr12:55100877-55100932	TIMELESS	8914	rs12299614	chr12:55117448	TIMELESS	9e-13	local	0.0160268
3457824	3457837	chr12:55100877-55100932	TIMELESS	8914	rs10876890	chr12:55120017	TIMELESS	1e-12	local	0.0615171
3457824	3457837	chr12:55100877-55100932	TIMELESS	8914	rs11610921	chr12:55120139	TIMELESS	1e-12	local	0.0615171
3457824	3457837	chr12:55100877-55100932	TIMELESS	8914	rs11171856	chr12:55128085	TIMELESS	5e-13	local	0.00690209
3457824	3457837	chr12:55100877-55100932	TIMELESS	8914	rs2371455	chr12:55130159	MIP	2e-15	local	0.0401518
3457824	3457837	chr12:55100877-55100932	TIMELESS	8914	rs3809125	chr12:55130615	MIP	5e-09	local	0.181598
3458337	3458371	chr12:55788233-55788296	STAT6	6778	rs10820990	chr9:94363117	CENPP	1e-08	distant	0.163683
3458337	3458372	chr12:55788302-55788328	STAT6	6778	rs3753314	chr1:15414123	TMEM51	9e-09	distant	0.0573477
3458337	3458372	chr12:55788302-55788328	STAT6	6778	rs2312334	chr1:15416268	TMEM51	8e-09	distant	0.049509
3458337	3458372	chr12:55788302-55788328	STAT6	6778	rs2312335	chr1:15417209	TMEM51	8e-09	distant	0.049509
3402506	3402519	chr12:6431093-6431124	TNFRSF7	939	rs995939	chr8:96427150		1e-08	distant	0.00448759
3404436	3404468	chr12:9739435-9739515	CLEC2D	29121	rs4656873	chr1:158297953	KCNJ10	1e-08	distant	2.83409e-05
3404436	3404468	chr12:9739435-9739515	CLEC2D	29121	rs9701452	chr1:227357529		3e-08	distant	0.0125019
3404436	3404468	chr12:9739435-9739515	CLEC2D	29121	rs11829981	chr12:26923479		3e-08	distant	0.00538222
3404436	3404468	chr12:9739435-9739515	CLEC2D	29121	rs17020888	chr12:91921855	LOC643339	2e-08	distant	0
3404436	3404468	chr12:9739435-9739515	CLEC2D	29121	rs4450274	chr13:73428019	KLF12	1e-08	distant	0.0106545
3404436	3404468	chr12:9739435-9739515	CLEC2D	29121	rs1024264	chr13:73439764	KLF12	2e-09	distant	0.00434605
3404436	3404468	chr12:9739435-9739515	CLEC2D	29121	rs2269769	chr17:45528163	PDK2	3e-08	distant	0.00214337
3404436	3404468	chr12:9739435-9739515	CLEC2D	29121	rs7586625	chr2:45345023		2e-08	distant	0.00647017
3404436	3404468	chr12:9739435-9739515	CLEC2D	29121	rs6827018	chr4:185581599	IRF2	7e-12	distant	0.00543596
3404436	3404468	chr12:9739435-9739515	CLEC2D	29121	rs17149247	chr5:121865122		8e-09	distant	0
3404436	3404468	chr12:9739435-9739515	CLEC2D	29121	rs10079754	chr5:155680528		3e-09	distant	0.004004
3404436	3404468	chr12:9739435-9739515	CLEC2D	29121	rs11950100	chr5:155688345	SGCD	4e-10	distant	0.000770367
3404436	3404468	chr12:9739435-9739515	CLEC2D	29121	rs1857770	chr5:155702032	SGCD	2e-08	distant	0.000770367
3404436	3404468	chr12:9739435-9739515	CLEC2D	29121	rs1859654	chr7:144421201		2e-09	distant	0.00866126
3404436	3404468	chr12:9739435-9739515	CLEC2D	29121	rs17795752	chr7:144426313		2e-09	distant	0.0059538
3404436	3404468	chr12:9739435-9739515	CLEC2D	29121	rs650871	chr7:4159372	SDK1	2e-08	distant	0.000105668
3404436	3404468	chr12:9739435-9739515	CLEC2D	29121	rs10505309	chr8:118306186		3e-08	distant	0
3404436	3404468	chr12:9739435-9739515	CLEC2D	29121	rs2288617	chr8:27351025	PTK2B	2e-08	distant	0.0143981
3404436	3404468	chr12:9739435-9739515	CLEC2D	29121	rs2241658	chr8:27353994	PTK2B	1e-09	distant	0.0228571
3404436	3404468	chr12:9739435-9739515	CLEC2D	29121	rs748281	chr8:27372959	CHRNA2,PTK2B	1e-08	distant	0.00540865
3404436	3404468	chr12:9739435-9739515	CLEC2D	29121	rs1864375	chr8:27381173	CHRNA2	1e-08	distant	0.0119283
3404436	3404468	chr12:9739435-9739515	CLEC2D	29121	rs13250773	chr8:4194489	CSMD1	2e-08	distant	0.000136281
3404436	3404468	chr12:9739435-9739515	CLEC2D	29121	rs17070159	chr8:4253713	CSMD1	7e-10	distant	0
3404436	3404468	chr12:9739435-9739515	CLEC2D	29121	rs1443851	chr9:13808215		4e-10	distant	0.00101601
3404436	3404469	chr12:9739538-9739621	CLEC2D	29121	rs4656873	chr1:158297953	KCNJ10	8e-09	distant	2.83409e-05
3404436	3404469	chr12:9739538-9739621	CLEC2D	29121	rs4987876	chr11:107597846	ATM,NPAT	3e-08	distant	0
3404436	3404469	chr12:9739538-9739621	CLEC2D	29121	rs17020888	chr12:91921855	LOC643339	1e-08	distant	0
3404436	3404469	chr12:9739538-9739621	CLEC2D	29121	rs2269769	chr17:45528163	PDK2	3e-08	distant	0.00214337
3404436	3404469	chr12:9739538-9739621	CLEC2D	29121	rs820363	chr3:124882008	MYLK	1e-08	distant	0.694637
3404436	3404469	chr12:9739538-9739621	CLEC2D	29121	rs13075905	chr3:18085209		2e-08	distant	0.00189542
3404436	3404469	chr12:9739538-9739621	CLEC2D	29121	rs2851783	chr4:160682461		2e-09	distant	0.00271493
3404436	3404469	chr12:9739538-9739621	CLEC2D	29121	rs6827018	chr4:185581599	IRF2	3e-11	distant	0.00543596
3404436	3404469	chr12:9739538-9739621	CLEC2D	29121	rs7722981	chr5:120580733		1e-08	distant	0.0013891
3404436	3404469	chr12:9739538-9739621	CLEC2D	29121	rs4895172	chr5:120603661		1e-08	distant	0.000718907
3404436	3404469	chr12:9739538-9739621	CLEC2D	29121	rs10079754	chr5:155680528		9e-09	distant	0.004004
3404436	3404469	chr12:9739538-9739621	CLEC2D	29121	rs11950100	chr5:155688345	SGCD	2e-10	distant	0.000770367
3404436	3404469	chr12:9739538-9739621	CLEC2D	29121	rs13358340	chr5:155690449	SGCD	3e-08	distant	0.000217439
3404436	3404469	chr12:9739538-9739621	CLEC2D	29121	rs1857769	chr5:155701940	SGCD	3e-08	distant	0.000217439
3404436	3404469	chr12:9739538-9739621	CLEC2D	29121	rs1857770	chr5:155702032	SGCD	1e-08	distant	0.000770367
3404436	3404469	chr12:9739538-9739621	CLEC2D	29121	rs17053447	chr5:155702271	SGCD	3e-08	distant	0.000217439
3404436	3404469	chr12:9739538-9739621	CLEC2D	29121	rs1859654	chr7:144421201		3e-08	distant	0.00866126
3404436	3404469	chr12:9739538-9739621	CLEC2D	29121	rs17795752	chr7:144426313		2e-08	distant	0.0059538
3404436	3404469	chr12:9739538-9739621	CLEC2D	29121	rs2522236	chr7:24981681	OSBPL3	6e-09	distant	0.00543596
3404436	3404469	chr12:9739538-9739621	CLEC2D	29121	rs2711005	chr7:24997943		2e-08	distant	0.00713133
3404436	3404469	chr12:9739538-9739621	CLEC2D	29121	rs2522234	chr7:24998148		2e-08	distant	0.00750626
3404436	3404469	chr12:9739538-9739621	CLEC2D	29121	rs2522233	chr7:24999950		2e-08	distant	0.00750626
3404436	3404469	chr12:9739538-9739621	CLEC2D	29121	rs650871	chr7:4159372	SDK1	2e-08	distant	0.000105668
3404436	3404469	chr12:9739538-9739621	CLEC2D	29121	rs2288617	chr8:27351025	PTK2B	9e-10	distant	0.0143981
3404436	3404469	chr12:9739538-9739621	CLEC2D	29121	rs2241658	chr8:27353994	PTK2B	3e-10	distant	0.0228571
3404436	3404469	chr12:9739538-9739621	CLEC2D	29121	rs2251430	chr8:27364765	PTK2B	4e-09	distant	0.00913764
3404436	3404469	chr12:9739538-9739621	CLEC2D	29121	rs3735758	chr8:27366462	PTK2B	4e-09	distant	0.00913764
3404436	3404469	chr12:9739538-9739621	CLEC2D	29121	rs10100812	chr8:27369804	PTK2B	3e-09	distant	0.00490196
3404436	3404469	chr12:9739538-9739621	CLEC2D	29121	rs1583092	chr8:27370735	PTK2B	3e-09	distant	0.00490196
3404436	3404469	chr12:9739538-9739621	CLEC2D	29121	rs748282	chr8:27372896	CHRNA2,PTK2B	4e-09	distant	0.00913764
3404436	3404469	chr12:9739538-9739621	CLEC2D	29121	rs748281	chr8:27372959	CHRNA2,PTK2B	3e-10	distant	0.00540865
3404436	3404469	chr12:9739538-9739621	CLEC2D	29121	rs2280375	chr8:27373253	CHRNA2,PTK2B	4e-09	distant	0.00913764
3404436	3404469	chr12:9739538-9739621	CLEC2D	29121	rs2292976	chr8:27374460	CHRNA2	5e-09	distant	0.00260149
3404436	3404469	chr12:9739538-9739621	CLEC2D	29121	rs2043063	chr8:27378350	CHRNA2	1e-08	distant	0.0108789
3404436	3404469	chr12:9739538-9739621	CLEC2D	29121	rs2322584	chr8:27379307	CHRNA2	2e-08	distant	0.00652377
3404436	3404469	chr12:9739538-9739621	CLEC2D	29121	rs1864375	chr8:27381173	CHRNA2	5e-10	distant	0.0119283
3404436	3404469	chr12:9739538-9739621	CLEC2D	29121	rs1443851	chr9:13808215		1e-11	distant	0.00101601
3404436	3404469	chr12:9739538-9739621	CLEC2D	29121	rs10816230	chr9:9904447	PTPRD	2e-08	distant	0.00269542
3404436	3404471	chr12:9739790-9739820	CLEC2D	29121	rs4656873	chr1:158297953	KCNJ10	5e-09	distant	2.83409e-05
3404436	3404471	chr12:9739790-9739820	CLEC2D	29121	rs1024264	chr13:73439764	KLF12	2e-08	distant	0.00434605
3404436	3404471	chr12:9739790-9739820	CLEC2D	29121	rs820363	chr3:124882008	MYLK	1e-08	distant	0.694637
3404436	3404471	chr12:9739790-9739820	CLEC2D	29121	rs6827018	chr4:185581599	IRF2	2e-11	distant	0.00543596
3404436	3404471	chr12:9739790-9739820	CLEC2D	29121	rs17149247	chr5:121865122		8e-09	distant	0
3404436	3404471	chr12:9739790-9739820	CLEC2D	29121	rs11950100	chr5:155688345	SGCD	2e-09	distant	0.000770367
3404436	3404471	chr12:9739790-9739820	CLEC2D	29121	rs1859654	chr7:144421201		7e-09	distant	0.00866126
3404436	3404471	chr12:9739790-9739820	CLEC2D	29121	rs17795752	chr7:144426313		7e-09	distant	0.0059538
3404436	3404471	chr12:9739790-9739820	CLEC2D	29121	rs2241658	chr8:27353994	PTK2B	5e-09	distant	0.0228571
3404436	3404471	chr12:9739790-9739820	CLEC2D	29121	rs748281	chr8:27372959	CHRNA2,PTK2B	3e-08	distant	0.00540865
3404436	3404471	chr12:9739790-9739820	CLEC2D	29121	rs1864375	chr8:27381173	CHRNA2	2e-08	distant	0.0119283
3404436	3404471	chr12:9739790-9739820	CLEC2D	29121	rs17070159	chr8:4253713	CSMD1	1e-08	distant	0
3404436	3404471	chr12:9739790-9739820	CLEC2D	29121	rs1443851	chr9:13808215		2e-10	distant	0.00101601
3404436	3404471	chr12:9739790-9739820	CLEC2D	29121	rs10816230	chr9:9904447	PTPRD	2e-08	distant	0.00269542
3502710	3502719	chr13:113288123-113288153	TFDP1	7027	rs11789433	chr9:2891127		7e-09	distant	0.187855
3506153	3506168	chr13:24729874-24729982	MTMR6	9107	rs11067295	chr12:113703385		3e-08	distant	0.000301659
3506153	3506168	chr13:24729874-24729982	LOC646482	646482	rs11067295	chr12:113703385		3e-08	distant	0.000301659
3506153	3506168	chr13:24729874-24729982	MTMR6	9107	rs17795365	chr16:26543512		3e-08	distant	0.0709964
3506153	3506168	chr13:24729874-24729982	LOC646482	646482	rs17795365	chr16:26543512		3e-08	distant	0.0709964
3506153	3506168	chr13:24729874-24729982	LOC646482	646482	rs6763638	chr3:101770590	TMEM45A	3e-08	distant	0.220086
3506153	3506168	chr13:24729874-24729982	MTMR6	9107	rs6763638	chr3:101770590	TMEM45A	3e-08	distant	0.220086
3506153	3506168	chr13:24729874-24729982	LOC646482	646482	rs6919431	chr6:155559363	TIAM2	6e-09	distant	0.043969
3506153	3506168	chr13:24729874-24729982	MTMR6	9107	rs6919431	chr6:155559363	TIAM2	6e-09	distant	0.043969
3506153	3506168	chr13:24729874-24729982	LOC646482	646482	rs9397232	chr6:155563379	TIAM2	6e-09	distant	0.0480336
3506153	3506168	chr13:24729874-24729982	MTMR6	9107	rs9397232	chr6:155563379	TIAM2	6e-09	distant	0.0480336
3555340	3555419	chr14:19942641-19942739	TEP1	7011	rs710697	chr12:68657319		3e-08	distant	0.0541365
3555340	3555419	chr14:19942641-19942739	TEP1	7011	rs1760898	chr14:19942720	TEP1	1e-22	local	0.104456
3555340	3555419	chr14:19942641-19942739	TEP1	7011	rs3762146	chr14:19943363	TEP1	7e-09	local	0.0643822
3555340	3555419	chr14:19942641-19942739	TEP1	7011	rs7645293	chr3:189250643		1e-10	distant	0.128548
3555340	3555419	chr14:19942641-19942739	TEP1	7011	rs1434537	chr4:96286536	BMPR1B	3e-08	distant	0.0140672
3528895	3528913	chr14:22416704-22416806	LRP10	26020	rs951647	chr10:90982183	LIPA	6e-09	distant	0.065978
3528895	3528913	chr14:22416704-22416806	LRP10	26020	rs1576817	chr10:90987443	LIPA	1e-08	distant	0.0653001
3558071	3558074	chr14:23804704-23804748	RABGGTA	5875	rs1291879	chr10:11130642	CUGBP2	3e-08	distant	0.0275357
3558071	3558074	chr14:23804704-23804748	RABGGTA	5875	rs13389715	chr2:170008862		2e-08	distant	0.0471753
3558071	3558081	chr14:23805848-23805907	RABGGTA	5875	rs729421	chr14:23806800	RABGGTA	3e-12	local	0.226549
3558071	3558081	chr14:23805848-23805907	RABGGTA	5875	rs3940231	chr14:23818202		5e-12	local	0.232753
3561039	3561043	chr14:34941351-34941484	NFKBIA	4792	rs11033504	chr11:36203357	LDLRAD3	1e-08	distant	0.001001
3561039	3561053	chr14:34943376-34943531	NFKBIA	4792	rs6832888	chr4:139736326		9e-09	distant	0.00254387
3561039	3561053	chr14:34943376-34943531	NFKBIA	4792	rs7680585	chr4:139749759		9e-09	distant	0.00119824
3561039	3561053	chr14:34943376-34943531	NFKBIA	4792	rs6815035	chr4:139751470		9e-09	distant	0.00119824
3566304	3566310	chr14:56746058-56746089	EXOC5	10640	rs6573136	chr14:56734524		1e-09	local	0.553238
3566304	3566310	chr14:56746058-56746089	EXOC5	10640	rs10135962	chr14:56735459		2e-09	local	0.562656
3566304	3566310	chr14:56746058-56746089	EXOC5	10640	rs2881345	chr14:56737475	EXOC5	2e-09	local	0.562656
3566304	3566310	chr14:56746058-56746089	EXOC5	10640	rs10135064	chr14:56738611	EXOC5	1e-08	local	0.677731
3566304	3566310	chr14:56746058-56746089	EXOC5	10640	rs4612984	chr14:56740711	EXOC5	1e-09	local	0.552886
3566304	3566310	chr14:56746058-56746089	EXOC5	10640	rs7157608	chr14:56740967	EXOC5	5e-10	local	0.608087
3566304	3566310	chr14:56746058-56746089	EXOC5	10640	rs8003535	chr14:56741756	EXOC5	2e-13	local	0.618978
3566304	3566310	chr14:56746058-56746089	EXOC5	10640	rs3742577	chr14:56742292	EXOC5	2e-09	local	0.562656
3566304	3566310	chr14:56746058-56746089	EXOC5	10640	rs3742578	chr14:56742467	EXOC5	2e-09	local	0.562656
3566304	3566310	chr14:56746058-56746089	EXOC5	10640	rs7141911	chr14:56742623	EXOC5	2e-09	local	0.549807
3566304	3566310	chr14:56746058-56746089	EXOC5	10640	rs10150771	chr14:56744937	EXOC5	3e-09	local	0.572784
3566304	3566310	chr14:56746058-56746089	EXOC5	10640	rs1804820	chr14:56746082	EXOC5	1e-13	local	0.627128
3566304	3566310	chr14:56746058-56746089	EXOC5	10640	rs10140993	chr14:56749209	EXOC5	2e-09	local	0.559659
3566304	3566310	chr14:56746058-56746089	EXOC5	10640	rs10140987	chr14:56749236	EXOC5	6e-13	local	0.640178
3566304	3566310	chr14:56746058-56746089	EXOC5	10640	rs10135879	chr14:56753886	EXOC5	2e-09	local	0.562656
3566304	3566310	chr14:56746058-56746089	EXOC5	10640	rs1555788	chr14:56754924	EXOC5	2e-09	local	0.562656
3566304	3566310	chr14:56746058-56746089	EXOC5	10640	rs8019850	chr14:56755186	EXOC5	2e-09	local	0.680672
3566304	3566310	chr14:56746058-56746089	EXOC5	10640	rs8015967	chr14:56757749	EXOC5	1e-10	local	0.680672
3566304	3566310	chr14:56746058-56746089	EXOC5	10640	rs10133193	chr14:56762483	EXOC5	2e-12	local	0.600029
3566304	3566310	chr14:56746058-56746089	EXOC5	10640	rs10133137	chr14:56762587	EXOC5	1e-13	local	0.627128
3566304	3566310	chr14:56746058-56746089	EXOC5	10640	rs7152967	chr14:56763189	EXOC5	2e-11	local	0.689943
3566304	3566310	chr14:56746058-56746089	EXOC5	10640	rs10136423	chr14:56763581	EXOC5	1e-12	local	0.603562
3566304	3566310	chr14:56746058-56746089	EXOC5	10640	rs10139409	chr14:56764304	EXOC5	3e-13	local	0.648581
3566304	3566310	chr14:56746058-56746089	EXOC5	10640	rs6573137	chr14:56769656	EXOC5	9e-13	local	0.614294
3566304	3566310	chr14:56746058-56746089	EXOC5	10640	rs3736904	chr14:56772439	EXOC5	1e-13	local	0.627128
3566304	3566310	chr14:56746058-56746089	EXOC5	10640	rs9323303	chr14:56780933	EXOC5	9e-11	local	0.447095
3566304	3566310	chr14:56746058-56746089	EXOC5	10640	rs17093005	chr14:56781736	EXOC5	6e-10	local	0.694637
3566304	3566310	chr14:56746058-56746089	EXOC5	10640	rs9323304	chr14:56782234	EXOC5	1e-10	local	0.680672
3566304	3566310	chr14:56746058-56746089	EXOC5	10640	rs2038860	chr14:56783174	EXOC5	1e-12	local	0.624584
3566304	3566310	chr14:56746058-56746089	EXOC5	10640	rs6573139	chr14:56790216	EXOC5	6e-10	local	0.701152
3566304	3566310	chr14:56746058-56746089	EXOC5	10640	rs7147218	chr14:56791809	EXOC5	2e-11	local	0.694637
3566304	3566310	chr14:56746058-56746089	EXOC5	10640	rs10133300	chr14:56792645	EXOC5	1e-13	local	0.627128
3566304	3566310	chr14:56746058-56746089	EXOC5	10640	rs7143805	chr14:56795354	EXOC5	2e-12	local	0.637008
3566304	3566310	chr14:56746058-56746089	EXOC5	10640	rs716690	chr14:56798404	EXOC5	2e-09	local	0.7225
3566304	3566310	chr14:56746058-56746089	EXOC5	10640	rs10141811	chr14:56800500	EXOC5	2e-13	local	0.640712
3566304	3566310	chr14:56746058-56746089	EXOC5	10640	rs10141911	chr14:56800603	EXOC5	2e-10	local	0.570512
3566304	3566310	chr14:56746058-56746089	EXOC5	10640	rs7152744	chr14:56805706	C14orf108,EXOC5	3e-12	local	0.646182
3566304	3566310	chr14:56746058-56746089	EXOC5	10640	rs7141198	chr14:56807221	C14orf108	1e-10	local	0.722701
3566304	3566310	chr14:56746058-56746089	EXOC5	10640	rs1189899	chr14:56811302	C14orf108	9e-13	local	0.640178
3566304	3566310	chr14:56746058-56746089	EXOC5	10640	rs2265059	chr14:56815969	C14orf108	1e-10	local	0.702842
3566304	3566310	chr14:56746058-56746089	EXOC5	10640	rs1203336	chr14:56817770	C14orf108	3e-12	local	0.627128
3566304	3566310	chr14:56746058-56746089	EXOC5	10640	rs1189902	chr14:56818957	C14orf108	2e-08	local	0.359871
3566304	3566310	chr14:56746058-56746089	EXOC5	10640	rs1189903	chr14:56821966	C14orf108	1e-11	local	0.640178
3566304	3566310	chr14:56746058-56746089	EXOC5	10640	rs1189904	chr14:56823521	C14orf108	3e-12	local	0.620906
3566304	3566310	chr14:56746058-56746089	EXOC5	10640	rs1889720	chr14:56830690		9e-12	local	0.614294
3566304	3566310	chr14:56746058-56746089	EXOC5	10640	rs4901768	chr14:56838637		8e-10	local	0.651738
3569754	3569766	chr14:68326671-68326952	ZFP36L1	677	rs942285	chr9:88037378	C9orf153	1e-08	distant	0.00578444
3542207	3542229	chr14:69306370-69306471	SFRS5	6430	rs541476	chr21:43619511		2e-08	distant	0.0207669
3617830	3617841	chr15:33067613-33067736	FLJ20582	54989	rs16960222	chr15:33057757	ZNF770	7e-10	local	0.131673
3617830	3617841	chr15:33067613-33067736	FLJ20582	54989	rs7165312	chr15:33058287	ZNF770	4e-10	local	0.126622
3634071	3634080	chr15:75131788-75131862	TSPAN3	10099	rs12908255	chr15:75088411	PSTPIP1	3e-08	local	0.21875
3634071	3634080	chr15:75131788-75131862	TSPAN3	10099	rs16968623	chr15:75099095	PSTPIP1	2e-08	local	0.229272
3634071	3634080	chr15:75131788-75131862	TSPAN3	10099	rs12913937	chr15:75103185	PSTPIP1	3e-20	local	0.0880473
3634071	3634080	chr15:75131788-75131862	TSPAN3	10099	rs4078354	chr15:75111934	PSTPIP1	6e-27	local	0.109415
3634071	3634080	chr15:75131788-75131862	TSPAN3	10099	rs9806416	chr15:75114625	PSTPIP1	2e-25	local	0.0871359
3634071	3634080	chr15:75131788-75131862	TSPAN3	10099	rs7169831	chr15:75155736		9e-28	local	0.43151
3634071	3634080	chr15:75131788-75131862	TSPAN3	10099	rs938501	chr15:75155766		2e-28	local	0.262504
3634071	3634080	chr15:75131788-75131862	TSPAN3	10099	rs2404234	chr15:75165494		4e-27	local	0.245573
3634071	3634080	chr15:75131788-75131862	TSPAN3	10099	rs12372961	chr15:75166009		6e-26	local	0.231905
3634071	3634080	chr15:75131788-75131862	TSPAN3	10099	rs16968665	chr15:75167771		5e-21	local	0.1114
3634071	3634080	chr15:75131788-75131862	TSPAN3	10099	rs2404233	chr15:75168276		3e-21	local	0.0906294
3634071	3634080	chr15:75131788-75131862	TSPAN3	10099	rs11639079	chr15:75190161	SGK269	5e-09	local	0.139298
3634071	3634080	chr15:75131788-75131862	TSPAN3	10099	rs11639197	chr15:75190282	SGK269	2e-08	local	0.139298
3634071	3634080	chr15:75131788-75131862	TSPAN3	10099	rs17466989	chr15:75203603	SGK269	6e-09	local	0.14498
3634071	3634080	chr15:75131788-75131862	TSPAN3	10099	rs11638220	chr15:75212282	SGK269	4e-09	local	0.152403
3634071	3634080	chr15:75131788-75131862	TSPAN3	10099	rs7166293	chr15:75216907	SGK269	9e-09	local	0.119538
3634071	3634080	chr15:75131788-75131862	TSPAN3	10099	rs11630837	chr15:75219658	SGK269	6e-09	local	0.14498
3634071	3634080	chr15:75131788-75131862	TSPAN3	10099	rs11637488	chr15:75220515	SGK269	4e-09	local	0.125608
3634071	3634080	chr15:75131788-75131862	TSPAN3	10099	rs12909704	chr15:75238018	SGK269	6e-09	local	0.14498
3634071	3634080	chr15:75131788-75131862	TSPAN3	10099	rs12910419	chr15:75238404	SGK269	6e-09	local	0.14498
3634071	3634080	chr15:75131788-75131862	TSPAN3	10099	rs17382798	chr15:75256073	SGK269	6e-09	local	0.14498
3634071	3634080	chr15:75131788-75131862	TSPAN3	10099	rs8032925	chr15:75268956	SGK269	6e-09	local	0.14498
3634071	3634080	chr15:75131788-75131862	TSPAN3	10099	rs7181345	chr15:75272618	SGK269	6e-09	local	0.14498
3634071	3634080	chr15:75131788-75131862	TSPAN3	10099	rs7163503	chr15:75280559	SGK269	3e-08	local	0.157369
3634071	3634080	chr15:75131788-75131862	TSPAN3	10099	rs2100054	chr15:75293481	SGK269	6e-09	local	0.14498
3634071	3634080	chr15:75131788-75131862	TSPAN3	10099	rs7182880	chr15:75312656	SGK269	6e-09	local	0.14498
3634071	3634080	chr15:75131788-75131862	TSPAN3	10099	rs11639314	chr15:75327156	SGK269	1e-13	local	0.33364
3634071	3634080	chr15:75131788-75131862	TSPAN3	10099	rs17383727	chr15:75360871	SGK269	2e-09	local	0.168542
3634071	3634080	chr15:75131788-75131862	TSPAN3	10099	rs6495237	chr15:75378589		1e-11	local	0.0384029
3634071	3634080	chr15:75131788-75131862	TSPAN3	10099	rs17384406	chr15:75388103		1e-08	local	0.162549
3634071	3634080	chr15:75131788-75131862	TSPAN3	10099	rs11633318	chr15:75389752		1e-08	local	0.136799
3634071	3634080	chr15:75131788-75131862	TSPAN3	10099	rs10519164	chr15:75412757		6e-09	local	0.14498
3634071	3634080	chr15:75131788-75131862	TSPAN3	10099	rs7162362	chr15:75447147		1e-08	local	0.118541
3634071	3634080	chr15:75131788-75131862	TSPAN3	10099	rs17470228	chr15:75447399		6e-09	local	0.14498
3634071	3634080	chr15:75131788-75131862	TSPAN3	10099	rs1554051	chr15:75461593		1e-09	local	0.153952
3644162	3644176	chr16:1778583-1778678	NUBP2	10101	rs345643	chr12:126601258		2e-09	distant	0.081812
3644162	3644176	chr16:1778583-1778678	NUBP2	10101	rs345650	chr12:126602435		3e-09	distant	0.0920291
3644541	3644584	chr16:2166649-2166869	TRAF7	84231	rs7111187	chr11:95550185	MAML2	1e-08	distant	0.00885868
3654227	3654254	chr16:27368405-27368748	IL21R	50615	rs414180	chr1:218950988		2e-08	distant	0.030784
3654227	3654254	chr16:27368405-27368748	IL21R	50615	rs7601434	chr2:101945350		2e-08	distant	0.0642481
3642815	3642832	chr16:390652-390733	NME4	4833	rs390499	chr16:382805		2e-08	local	0.34283
3678395	3678399	chr16:4795238-4795291	N-PAC	84656	rs2341986	chr16:4759496		2e-24	local	0.123461
3678395	3678399	chr16:4795238-4795291	N-PAC	84656	rs2075465	chr16:4786068	LOC440335,ROGDI	4e-18	local	0.0438356
3678395	3678399	chr16:4795238-4795291	N-PAC	84656	rs8118	chr16:4787169	ROGDI	5e-11	local	0.0840892
3678395	3678399	chr16:4795238-4795291	N-PAC	84656	rs7546	chr16:4787317	ROGDI	8e-09	local	0.029847
3678395	3678399	chr16:4795238-4795291	N-PAC	84656	rs8064024	chr16:4795279	N-PAC	1e-41	local	0.143601
3678395	3678399	chr16:4795238-4795291	N-PAC	84656	rs930854	chr16:4804101	N-PAC	4e-31	local	0.110464
3678395	3678399	chr16:4795238-4795291	N-PAC	84656	rs930855	chr16:4804179	N-PAC	3e-31	local	0.112812
3678395	3678399	chr16:4795238-4795291	N-PAC	84656	rs6500635	chr16:4807565	N-PAC	4e-31	local	0.110377
3678395	3678399	chr16:4795238-4795291	N-PAC	84656	rs2075467	chr16:4813242	N-PAC	3e-14	local	0.0131329
3678395	3678399	chr16:4795238-4795291	N-PAC	84656	rs9925944	chr16:4825229	N-PAC	5e-20	local	0.0559271
3678395	3678399	chr16:4795238-4795291	N-PAC	84656	rs11076849	chr16:4828304	N-PAC	5e-14	local	0.0141782
3678395	3678399	chr16:4795238-4795291	N-PAC	84656	rs1827983	chr16:4838517	UBN1	6e-16	local	0.165117
3678395	3678399	chr16:4795238-4795291	N-PAC	84656	rs9934930	chr16:4842038	UBN1	8e-16	local	0.0742706
3678395	3678399	chr16:4795238-4795291	N-PAC	84656	rs9935080	chr16:4842207	UBN1	3e-19	local	0.126298
3678395	3678399	chr16:4795238-4795291	N-PAC	84656	rs8056889	chr16:4843243	UBN1	1e-19	local	0.137889
3678395	3678399	chr16:4795238-4795291	N-PAC	84656	rs9923349	chr16:4845124	UBN1	8e-16	local	0.208809
3678395	3678399	chr16:4795238-4795291	N-PAC	84656	rs966062	chr16:4847430	UBN1	9e-10	local	0.0465055
3678395	3678399	chr16:4795238-4795291	N-PAC	84656	rs3747613	chr16:4848504	UBN1	3e-10	local	0.00112233
3678395	3678399	chr16:4795238-4795291	N-PAC	84656	rs960006	chr16:4851195	UBN1	2e-13	local	0.0660085
3678395	3678399	chr16:4795238-4795291	N-PAC	84656	rs1395602	chr16:4851239	UBN1	4e-12	local	0.0496245
3678395	3678399	chr16:4795238-4795291	N-PAC	84656	rs2063101	chr16:4856348	UBN1	5e-14	local	0.0559435
3678395	3678399	chr16:4795238-4795291	N-PAC	84656	rs8056320	chr16:4858017	UBN1	6e-13	local	0.0494
3678395	3678399	chr16:4795238-4795291	N-PAC	84656	rs3813749	chr16:4859127	UBN1	4e-18	local	0.128909
3678395	3678399	chr16:4795238-4795291	N-PAC	84656	rs12446456	chr16:4862201	UBN1	2e-08	local	0.00111111
3678395	3678399	chr16:4795238-4795291	N-PAC	84656	rs2251666	chr16:4863091	UBN1	1e-11	local	0.00771843
3678395	3678399	chr16:4795238-4795291	N-PAC	84656	rs2456779	chr16:4865817	UBN1	4e-11	local	0.0114421
3678395	3678399	chr16:4795238-4795291	N-PAC	84656	rs1876359	chr16:4870100	UBN1	4e-12	local	0.005612
3678395	3678399	chr16:4795238-4795291	N-PAC	84656	rs3185547	chr16:4871100	PPL,UBN1	6e-12	local	0.00775194
3678395	3678399	chr16:4795238-4795291	N-PAC	84656	rs882235	chr16:4871651	PPL,UBN1	2e-08	local	0.0337242
3678395	3678399	chr16:4795238-4795291	N-PAC	84656	rs741769	chr16:4876205	PPL	8e-09	local	0.00588235
3693533	3693572	chr16:56789204-56789229	CSNK2A2	1459	rs202976	chr14:26808880		3e-08	distant	0.0284029
3697015	3697019	chr16:68844672-68844707	AARS	16	rs8048678	chr16:68525701	WWP2	1e-09	local	0.0329539
3697015	3697019	chr16:68844672-68844707	AARS	16	rs8048590	chr16:68525867	WWP2	3e-12	local	0.0893492
3697015	3697019	chr16:68844672-68844707	AARS	16	rs1983016	chr16:68527829	WWP2	3e-16	local	0.0992799
3697015	3697019	chr16:68844672-68844707	AARS	16	rs904803	chr16:68528029	WWP2	2e-15	local	0.0902848
3697015	3697019	chr16:68844672-68844707	AARS	16	rs1833930	chr16:68662416		1e-10	local	0.10739
3697015	3697019	chr16:68844672-68844707	AARS	16	rs4985392	chr16:68663699		3e-11	local	0.109235
3697015	3697019	chr16:68844672-68844707	AARS	16	rs11075763	chr16:68983092	ST3GAL2	5e-29	local	0.0630537
3670918	3671050	chr16:80549161-80549275	PLCG2	5336	rs10483127	chr22:25552285		3e-08	distant	0.0225003
3703885	3703886	chr16:86421224-86422260	SLC7A5	8140	rs9555088	chr13:104221946		2e-09	distant	0.00738975
3703885	3703886	chr16:86421224-86422260	SLC7A5	8140	rs7327793	chr13:44978505	COG3	1e-08	distant	0.103724
3703885	3703886	chr16:86421224-86422260	SLC7A5	8140	rs12598264	chr16:86407299		5e-12	local	0.00747849
3703885	3703886	chr16:86421224-86422260	SLC7A5	8140	rs7200184	chr16:86409672		2e-14	local	0.0165036
3703885	3703886	chr16:86421224-86422260	SLC7A5	8140	rs12598848	chr16:86411837		1e-08	local	0.0341164
3703885	3703886	chr16:86421224-86422260	SLC7A5	8140	rs3768834	chr2:210228996	MAP2	3e-08	distant	0.0846561
3703885	3703886	chr16:86421224-86422260	SLC7A5	8140	rs3768832	chr2:210240680	MAP2	3e-08	distant	0.0846561
3703885	3703886	chr16:86421224-86422260	SLC7A5	8140	rs3768822	chr2:210246250	MAP2	3e-08	distant	0.0846561
3703885	3703886	chr16:86421224-86422260	SLC7A5	8140	rs10234195	chr7:13249943		1e-08	distant	0.312576
3704376	3704393	chr16:87311449-87311479	FAM38A	9780	rs2031340	chr10:10626376		1e-08	distant	0.0927872
3704376	3704393	chr16:87311449-87311479	FAM38A	9780	rs2031339	chr10:10626568		5e-09	distant	0.0958525
3704376	3704393	chr16:87311449-87311479	FAM38A	9780	rs3824904	chr11:74583382	SLCO2B1	3e-08	distant	0.0845
3704896	3704899	chr16:88238612-88239081	PCOLN3	5119	rs3803679	chr16:88118167	SPG7	2e-08	local	0.0010671
3704896	3704899	chr16:88238612-88239081	PCOLN3	5119	rs8059821	chr16:88202568		7e-12	local	0.0779086
3704896	3704899	chr16:88238612-88239081	PCOLN3	5119	rs154665	chr16:88218188	DPEP1	2e-13	local	0.088
3704896	3704899	chr16:88238612-88239081	PCOLN3	5119	rs12930346	chr16:88219269	DPEP1	9e-09	local	0.119304
3704896	3704899	chr16:88238612-88239081	PCOLN3	5119	rs908951	chr16:88225125	DPEP1	6e-13	local	0.0209364
3704896	3704899	chr16:88238612-88239081	PCOLN3	5119	rs445537	chr16:88230924	DPEP1	4e-25	local	0.191778
3704896	3704899	chr16:88238612-88239081	PCOLN3	5119	rs154657	chr16:88235596		3e-25	local	0.195926
3704896	3704899	chr16:88238612-88239081	PCOLN3	5119	rs164749	chr16:88235724		2e-12	local	0
3704896	3704899	chr16:88238612-88239081	PCOLN3	5119	rs164748	chr16:88235792		3e-25	local	0.195926
3704896	3704899	chr16:88238612-88239081	PCOLN3	5119	rs460879	chr16:88240389	CHMP1A	6e-16	local	0.0215046
3704896	3704899	chr16:88238612-88239081	PCOLN3	5119	rs11647958	chr16:88248409	CHMP1A	6e-11	local	0.0177827
3704896	3704899	chr16:88238612-88239081	PCOLN3	5119	rs7188458	chr16:88253984	C16orf55	4e-13	local	0.0200708
3704896	3704899	chr16:88238612-88239081	PCOLN3	5119	rs258330	chr16:88257074	C16orf55	6e-28	local	0.143184
3704896	3704899	chr16:88238612-88239081	PCOLN3	5119	rs459920	chr16:88258327	C16orf55	3e-19	local	0.100484
3704896	3704899	chr16:88238612-88239081	PCOLN3	5119	rs447735	chr16:88261849	C16orf55	2e-28	local	0.191736
3704896	3704899	chr16:88238612-88239081	PCOLN3	5119	rs2115401	chr16:88268109		3e-19	local	0.0505051
3704896	3704899	chr16:88238612-88239081	PCOLN3	5119	rs12924572	chr16:88276236		1e-09	local	0.0208493
3704896	3704899	chr16:88238612-88239081	PCOLN3	5119	rs12924138	chr16:88281944	CDK10	2e-09	local	0.108964
3704896	3704899	chr16:88238612-88239081	PCOLN3	5119	rs164744	chr16:88284268	CDK10	8e-13	local	0.232139
3704896	3704899	chr16:88238612-88239081	PCOLN3	5119	rs164742	chr16:88285225	CDK10	5e-11	local	0.130917
3704896	3704899	chr16:88238612-88239081	PCOLN3	5119	rs2162943	chr16:88288152	CDK10	7e-09	local	0.116939
3704896	3704899	chr16:88238612-88239081	PCOLN3	5119	rs462769	chr16:88290763	SPATA2L	5e-09	local	0.201232
3704896	3704899	chr16:88238612-88239081	PCOLN3	5119	rs3751696	chr16:88291119	SPATA2L	6e-10	local	0.121433
3704896	3704899	chr16:88238612-88239081	PCOLN3	5119	rs12149952	chr16:88307590	C16orf7,LOC100128862	2e-11	local	0.0130267
3704896	3704899	chr16:88238612-88239081	PCOLN3	5119	rs8048331	chr16:88320542	ZNF276	9e-09	local	0.086614
3704896	3704899	chr16:88238612-88239081	PCOLN3	5119	rs4785710	chr16:88324256	ZNF276	2e-09	local	0.0630612
3704896	3704899	chr16:88238612-88239081	PCOLN3	5119	rs9935559	chr16:88328029	ZNF276	7e-09	local	0.0583184
3704896	3704899	chr16:88238612-88239081	PCOLN3	5119	rs1230	chr16:88332355	FANCA,ZNF276	2e-09	local	0.225069
3704896	3704899	chr16:88238612-88239081	PCOLN3	5119	rs7195906	chr16:88333847	FANCA,ZNF276	4e-09	local	0.227813
3704896	3704899	chr16:88238612-88239081	PCOLN3	5119	rs6500439	chr16:88335775	FANCA	1e-09	local	0.210422
3704896	3704899	chr16:88238612-88239081	PCOLN3	5119	rs12102290	chr16:88340117	FANCA	4e-10	local	0.255445
3704896	3704899	chr16:88238612-88239081	PCOLN3	5119	rs12102297	chr16:88340262	FANCA	6e-11	local	0.250685
3704896	3704899	chr16:88238612-88239081	PCOLN3	5119	rs4420527	chr16:88341688	FANCA	4e-11	local	0.239803
3704896	3704899	chr16:88238612-88239081	PCOLN3	5119	rs886952	chr16:88364281	FANCA	7e-09	local	0.121188
3704896	3704899	chr16:88238612-88239081	PCOLN3	5119	rs12599180	chr16:88366806	FANCA	3e-08	local	0.0838621
3704896	3704899	chr16:88238612-88239081	PCOLN3	5119	rs1800337	chr16:88372694	FANCA	4e-09	local	0.108962
3704896	3704899	chr16:88238612-88239081	PCOLN3	5119	rs3743859	chr16:88373550	FANCA	2e-08	local	0.0891074
3704896	3704899	chr16:88238612-88239081	PCOLN3	5119	rs12448860	chr16:88377129	FANCA	3e-08	local	0.0891074
3704896	3704899	chr16:88238612-88239081	PCOLN3	5119	rs8046243	chr16:88379633	FANCA	2e-09	local	0.170291
3704896	3704899	chr16:88238612-88239081	PCOLN3	5119	rs12709094	chr16:88380517	FANCA	3e-10	local	0.139261
3704896	3704899	chr16:88238612-88239081	PCOLN3	5119	rs6500449	chr16:88383893	FANCA	2e-09	local	0.142984
3704896	3704899	chr16:88238612-88239081	PCOLN3	5119	rs8045232	chr16:88385048	FANCA	4e-09	local	0.165571
3704896	3704899	chr16:88238612-88239081	PCOLN3	5119	rs1800287	chr16:88386025	FANCA	2e-08	local	0.179616
3704896	3704899	chr16:88238612-88239081	PCOLN3	5119	rs6500453	chr16:88386157	FANCA	1e-08	local	0.134151
3704896	3704899	chr16:88238612-88239081	PCOLN3	5119	rs11076626	chr16:88392603	FANCA	7e-10	local	0.204168
3704896	3704899	chr16:88238612-88239081	PCOLN3	5119	rs10852623	chr16:88392742	FANCA	5e-09	local	0.183008
3704896	3704899	chr16:88238612-88239081	PCOLN3	5119	rs7190823	chr16:88393543	FANCA	1e-09	local	0.183008
3704896	3704899	chr16:88238612-88239081	PCOLN3	5119	rs12599799	chr16:88394868	FANCA	8e-10	local	0.170667
3704896	3704899	chr16:88238612-88239081	PCOLN3	5119	rs11076628	chr16:88402746	FANCA	7e-09	local	0.136046
3704896	3704899	chr16:88238612-88239081	PCOLN3	5119	rs11861084	chr16:88403210	FANCA	3e-10	local	0.0530845
3704896	3704899	chr16:88238612-88239081	PCOLN3	5119	rs11076632	chr16:88408037	FANCA	4e-09	local	0.123977
3704896	3704899	chr16:88238612-88239081	PCOLN3	5119	rs1108064	chr16:88421650	SPIRE2	8e-11	local	0.0725926
3704896	3704899	chr16:88238612-88239081	PCOLN3	5119	rs12599531	chr16:88436901	SPIRE2	7e-10	local	0.0342158
3704896	3704899	chr16:88238612-88239081	PCOLN3	5119	rs10775347	chr16:88442008	SPIRE2	1e-08	local	0.158921
3704896	3704899	chr16:88238612-88239081	PCOLN3	5119	rs10852626	chr16:88442133	SPIRE2	4e-10	local	0.032967
3704896	3704899	chr16:88238612-88239081	PCOLN3	5119	rs6134432	chr20:11939887		1e-08	distant	0.145815
3704896	3704899	chr16:88238612-88239081	PCOLN3	5119	rs6131296	chr20:11944719		2e-08	distant	0.1553
3704896	3704899	chr16:88238612-88239081	PCOLN3	5119	rs11699987	chr20:11944730		3e-08	distant	0.150944
3704896	3704899	chr16:88238612-88239081	PCOLN3	5119	rs7349657	chr4:118835648		1e-10	distant	0.0787527
3740479	3740522	chr17:1527067-1527171	PRPF8	10594	rs11078563	chr17:1523118	PRPF8	2e-08	local	0.213686
3715703	3715716	chr17:24025440-24025556	SUPT6H	6830	rs1583673	chr3:81243767		2e-08	distant	0.106223
3715703	3715716	chr17:24025440-24025556	SUPT6H	6830	rs6806220	chr3:81270556		3e-08	distant	0.219978
3759077	3759083	chr17:39753521-39753591	CGI-69	51629	rs4792935	chr17:39726326		4e-43	local	0.177607
3759077	3759083	chr17:39753521-39753591	CGI-69	51629	rs7219704	chr17:39735602		8e-25	local	0.0407205
3759077	3759083	chr17:39753521-39753591	CGI-69	51629	rs9915364	chr17:39739892	RUNDC3A	4e-44	local	0.18277
3759077	3759083	chr17:39753521-39753591	CGI-69	51629	rs708386	chr17:39748147	RUNDC3A	4e-44	local	0.18277
3759077	3759083	chr17:39753521-39753591	CGI-69	51629	rs2074105	chr17:39748773	RUNDC3A	7e-34	local	0.135346
3759077	3759083	chr17:39753521-39753591	CGI-69	51629	rs11654436	chr17:39748987	RUNDC3A	1e-57	local	0.201232
3759077	3759083	chr17:39753521-39753591	CGI-69	51629	rs2074104	chr17:39749019	RUNDC3A	2e-26	local	0.0836227
3759077	3759083	chr17:39753521-39753591	CGI-69	51629	rs2011951	chr17:39753577	SLC25A39	1e-57	local	0.201232
3759077	3759083	chr17:39753521-39753591	CGI-69	51629	rs2011895	chr17:39754282	SLC25A39	7e-56	local	0.187665
3759077	3759083	chr17:39753521-39753591	CGI-69	51629	rs8079946	chr17:39757233	SLC25A39	2e-44	local	0.167881
3759077	3759083	chr17:39753521-39753591	CGI-69	51629	rs7216307	chr17:39769006		1e-15	local	0.0205855
3759077	3759083	chr17:39753521-39753591	CGI-69	51629	rs4793097	chr17:39771252		6e-23	local	0.0380603
3759077	3759083	chr17:39753521-39753591	CGI-69	51629	rs11655476	chr17:39771297		1e-17	local	0.0453721
3759077	3759083	chr17:39753521-39753591	CGI-69	51629	rs850714	chr17:39773021		1e-15	local	0.0398248
3759077	3759083	chr17:39753521-39753591	CGI-69	51629	rs3760365	chr17:39776201	GRN	6e-12	local	0.00871576
3759077	3759083	chr17:39753521-39753591	CGI-69	51629	rs2879096	chr17:39779081	GRN	1e-10	local	0.00114478
3759077	3759083	chr17:39753521-39753591	CGI-69	51629	rs3785817	chr17:39779190	GRN	4e-10	local	0.0014498
3759077	3759083	chr17:39753521-39753591	CGI-69	51629	rs4792938	chr17:39780124	GRN	5e-23	local	0.100278
3722917	3722941	chr17:39784639-39784689	GRN	2896	rs13317815	chr3:23963688	NR1D2	3e-08	distant	0.14014
3722917	3722941	chr17:39784639-39784689	GRN	2896	rs1478489	chr5:63154021		6e-10	distant	0.0484477
3760137	3760140	chr17:41463629-41464478	KIAA1267	284058	rs6569570	chr6:129230037		3e-08	distant	0.165645
3760137	3760212	chr17:41604001-41604754	KIAA1267	284058	rs439558	chr17:41073585		9e-11	local	0.023554
3760137	3760212	chr17:41604001-41604754	KIAA1267	284058	rs4074462	chr17:41210993		5e-09	local	0.027984
3760137	3760212	chr17:41604001-41604754	KIAA1267	284058	rs885639	chr17:41284393	LOC100128977	3e-08	local	0.000448229
3760137	3760212	chr17:41604001-41604754	KIAA1267	284058	rs8070723	chr17:41436900	MAPT	2e-10	local	0.0161097
3760137	3760212	chr17:41604001-41604754	KIAA1267	284058	rs199505	chr17:42214570	WNT3	3e-08	local	0.0120914
3760137	3760212	chr17:41604001-41604754	KIAA1267	284058	rs70602	chr17:42214875	WNT3	9e-09	local	0.0170372
3760137	3760212	chr17:41604001-41604754	KIAA1267	284058	rs199501	chr17:42217771	WNT3	1e-08	local	0.352148
3760137	3760212	chr17:41604001-41604754	KIAA1267	284058	rs13126626	chr4:184169678		1e-08	distant	0.0682955
3725035	3725040	chr17:43483182-43483348	NFE2L1	4779	rs17659798	chr11:28831572		3e-08	distant	0.030769
3725035	3725060	chr17:43491321-43491556	NFE2L1	4779	rs11982788	chr7:144490055		1e-08	distant	0.0383523
3725392	3725419	chr17:44284906-44284933	CALCOCO2	10241	rs12450440	chr17:44266351	CALCOCO2	2e-20	local	0.126482
3725392	3725419	chr17:44284906-44284933	CALCOCO2	10241	rs2303015	chr17:44284906	CALCOCO2	3e-23	local	0.134043
3725392	3725419	chr17:44284906-44284933	CALCOCO2	10241	rs11434	chr17:44296243	CALCOCO2	2e-23	local	0.134043
3725392	3725419	chr17:44284906-44284933	CALCOCO2	10241	rs11654595	chr17:44297998		2e-21	local	0.121837
3725392	3725419	chr17:44284906-44284933	CALCOCO2	10241	rs12449856	chr17:44301995		2e-19	local	0.105942
3725392	3725419	chr17:44284906-44284933	CALCOCO2	10241	rs8079874	chr17:44305973		3e-21	local	0.126482
3742627	3742635	chr17:5067396-5067444	UNQ5783	388325	rs3855857	chr17:4969442		3e-13	local	0.00172043
3742627	3742635	chr17:5067396-5067444	UNQ5783	388325	rs2071457	chr17:4972749	USP6	2e-13	local	0.00219276
3742627	3742635	chr17:5067396-5067444	UNQ5783	388325	rs11078548	chr17:4975192	USP6	2e-28	local	0.276229
3742627	3742635	chr17:5067396-5067444	UNQ5783	388325	rs4080179	chr17:4983145	USP6	2e-14	local	0.01345
3742627	3742635	chr17:5067396-5067444	UNQ5783	388325	rs8073787	chr17:4983617	USP6	7e-12	local	0.166106
3742627	3742635	chr17:5067396-5067444	UNQ5783	388325	rs9899177	chr17:4999531	USP6	2e-31	local	0.267069
3742627	3742635	chr17:5067396-5067444	UNQ5783	388325	rs11652440	chr17:5003294	USP6	2e-28	local	0.276229
3742627	3742635	chr17:5067396-5067444	UNQ5783	388325	rs2307139	chr17:5006728	USP6	4e-27	local	0.286137
3742627	3742635	chr17:5067396-5067444	UNQ5783	388325	rs11658877	chr17:5013039	USP6	9e-30	local	0.306715
3742627	3742635	chr17:5067396-5067444	UNQ5783	388325	rs4069714	chr17:5014046	USP6	2e-11	local	0.0125292
3742627	3742635	chr17:5067396-5067444	UNQ5783	388325	rs2309367	chr17:5019317	USP6	4e-27	local	0.286137
3742627	3742635	chr17:5067396-5067444	UNQ5783	388325	rs4115657	chr17:5026616	ZNF594	9e-30	local	0.306715
3742627	3742635	chr17:5067396-5067444	UNQ5783	388325	rs9908414	chr17:5027763	ZNF594	3e-13	local	0.196949
3742627	3742635	chr17:5067396-5067444	UNQ5783	388325	rs2641232	chr17:5028325	ZNF594	1e-24	local	0.277337
3742627	3742635	chr17:5067396-5067444	UNQ5783	388325	rs2641233	chr17:5028446	ZNF594	1e-13	local	0.0142857
3742627	3742635	chr17:5067396-5067444	UNQ5783	388325	rs2585283	chr17:5030554	ZNF594	4e-27	local	0.286137
3742627	3742635	chr17:5067396-5067444	UNQ5783	388325	rs2585254	chr17:5038700	LOC100130950	6e-15	local	0.0293585
3742627	3742635	chr17:5067396-5067444	UNQ5783	388325	rs2698812	chr17:5039128	LOC100130950	9e-30	local	0.306715
3742627	3742635	chr17:5067396-5067444	UNQ5783	388325	rs12449298	chr17:5045770	LOC100130950	2e-18	local	0.159247
3742627	3742635	chr17:5067396-5067444	UNQ5783	388325	rs2641263	chr17:5054301	C17orf87,LOC100130950	2e-31	local	0.323299
3742627	3742635	chr17:5067396-5067444	UNQ5783	388325	rs2641261	chr17:5056132	C17orf87,LOC100130950	1e-21	local	0.236835
3742627	3742635	chr17:5067396-5067444	UNQ5783	388325	rs2585275	chr17:5065808	C17orf87,LOC100130950	2e-60	local	0.296296
3742627	3742635	chr17:5067396-5067444	UNQ5783	388325	rs2585273	chr17:5066930	C17orf87,LOC100130950	1e-38	local	0.293452
3742627	3742635	chr17:5067396-5067444	UNQ5783	388325	rs2641256	chr17:5067397	C17orf87,LOC100130950	2e-37	local	0.268865
3742627	3742635	chr17:5067396-5067444	UNQ5783	388325	rs2585271	chr17:5067412	C17orf87,LOC100130950	1e-60	local	0.290659
3742627	3742635	chr17:5067396-5067444	UNQ5783	388325	rs2641253	chr17:5070089	C17orf87	2e-57	local	0.257553
3742627	3742635	chr17:5067396-5067444	UNQ5783	388325	rs2585281	chr17:5073039	C17orf87	8e-49	local	0.378247
3742627	3742635	chr17:5067396-5067444	UNQ5783	388325	rs2641238	chr17:5074457	C17orf87	3e-26	local	0.15227
3742627	3742635	chr17:5067396-5067444	UNQ5783	388325	rs2585292	chr17:5074530	C17orf87	1e-26	local	0.131033
3742627	3742635	chr17:5067396-5067444	UNQ5783	388325	rs2467301	chr17:5131185	RABEP1	3e-08	local	0.224719
3742627	3742635	chr17:5067396-5067444	UNQ5783	388325	rs2251155	chr17:5139823	RABEP1	3e-08	local	0.222527
3742627	3742635	chr17:5067396-5067444	UNQ5783	388325	rs8064959	chr17:5218452	RABEP1	2e-10	local	0.0244411
3742627	3742635	chr17:5067396-5067444	UNQ5783	388325	rs8703	chr17:5227415	RABEP1	1e-08	local	0.0204703
3742627	3742635	chr17:5067396-5067444	UNQ5783	388325	rs12965399	chr18:25862853		3e-08	distant	0.2757
3742627	3742635	chr17:5067396-5067444	UNQ5783	388325	rs4384669	chr18:25876512		2e-08	distant	0.310174
3742627	3742635	chr17:5067396-5067444	UNQ5783	388325	rs2142160	chr21:30053604	GRIK1	1e-08	distant	0.174934
3742627	3742635	chr17:5067396-5067444	UNQ5783	388325	rs5767860	chr22:46415176		1e-09	distant	0.101976
3742627	3742635	chr17:5067396-5067444	UNQ5783	388325	rs5767881	chr22:46424552		1e-10	distant	0.0931687
3742627	3742635	chr17:5067396-5067444	UNQ5783	388325	rs5767885	chr22:46426595		1e-10	distant	0.0914868
3707642	3707689	chr17:5228417-5228664	RABEP1	9135	rs11214093	chr11:111497801		3e-08	distant	0.150821
3707642	3707689	chr17:5228417-5228664	RABEP1	9135	rs8073787	chr17:4983617	USP6	3e-09	local	0.166106
3707642	3707689	chr17:5228417-5228664	RABEP1	9135	rs9908414	chr17:5027763	ZNF594	2e-09	local	0.196949
3707642	3707689	chr17:5228417-5228664	RABEP1	9135	rs9892960	chr17:5116797		4e-20	local	0.202638
3707642	3707689	chr17:5228417-5228664	RABEP1	9135	rs9891728	chr17:5122784		2e-09	local	0.0497771
3707642	3707689	chr17:5228417-5228664	RABEP1	9135	rs1602914	chr17:5130831	RABEP1	3e-13	local	0.120424
3707642	3707689	chr17:5228417-5228664	RABEP1	9135	rs2467301	chr17:5131185	RABEP1	2e-21	local	0.224719
3707642	3707689	chr17:5228417-5228664	RABEP1	9135	rs7212681	chr17:5132250	RABEP1	1e-13	local	0.123445
3707642	3707689	chr17:5228417-5228664	RABEP1	9135	rs2641231	chr17:5133679	RABEP1	7e-22	local	0.224711
3707642	3707689	chr17:5228417-5228664	RABEP1	9135	rs9912506	chr17:5139761	RABEP1	3e-08	local	0.0336205
3707642	3707689	chr17:5228417-5228664	RABEP1	9135	rs2251155	chr17:5139823	RABEP1	5e-22	local	0.222527
3707642	3707689	chr17:5228417-5228664	RABEP1	9135	rs937232	chr17:5140029	RABEP1	1e-13	local	0.114976
3707642	3707689	chr17:5228417-5228664	RABEP1	9135	rs7212514	chr17:5154318	RABEP1	7e-14	local	0.113112
3707642	3707689	chr17:5228417-5228664	RABEP1	9135	rs7220835	chr17:5159463	RABEP1	5e-14	local	0.109653
3707642	3707689	chr17:5228417-5228664	RABEP1	9135	rs9894017	chr17:5162257	RABEP1	1e-08	local	0.126548
3707642	3707689	chr17:5228417-5228664	RABEP1	9135	rs10454710	chr17:5169749	RABEP1	2e-08	local	0.119144
3707642	3707689	chr17:5228417-5228664	RABEP1	9135	rs6502860	chr17:5177735	RABEP1	2e-13	local	0.106647
3707642	3707689	chr17:5228417-5228664	RABEP1	9135	rs9907108	chr17:5185617	RABEP1	7e-09	local	0.111888
3707642	3707689	chr17:5228417-5228664	RABEP1	9135	rs9903367	chr17:5189949	RABEP1	1e-13	local	0.114976
3707642	3707689	chr17:5228417-5228664	RABEP1	9135	rs7219586	chr17:5194840	RABEP1	1e-13	local	0.108173
3707642	3707689	chr17:5228417-5228664	RABEP1	9135	rs11078559	chr17:5203472	RABEP1	3e-13	local	0.12136
3707642	3707689	chr17:5228417-5228664	RABEP1	9135	rs8064959	chr17:5218452	RABEP1	8e-09	local	0.0244411
3707642	3707689	chr17:5228417-5228664	RABEP1	9135	rs3026109	chr17:5225203	RABEP1	2e-10	local	0.00918406
3707642	3707689	chr17:5228417-5228664	RABEP1	9135	rs1065482	chr17:5225442	RABEP1	5e-10	local	0.00684166
3707642	3707689	chr17:5228417-5228664	RABEP1	9135	rs1065483	chr17:5225493	RABEP1	6e-13	local	0.0874251
3707642	3707689	chr17:5228417-5228664	RABEP1	9135	rs3026115	chr17:5225945	RABEP1	3e-10	local	0.0248776
3707642	3707689	chr17:5228417-5228664	RABEP1	9135	rs8703	chr17:5227415	RABEP1	1e-10	local	0.0204703
3707642	3707689	chr17:5228417-5228664	RABEP1	9135	rs1058381	chr17:5228741	NUP88,RABEP1	2e-10	local	0.0128557
3707642	3707689	chr17:5228417-5228664	RABEP1	9135	rs1058400	chr17:5229517	NUP88,RABEP1	3e-10	local	0.0106013
3707642	3707689	chr17:5228417-5228664	RABEP1	9135	rs7426	chr17:5229706	NUP88,RABEP1	1e-13	local	0.0904018
3707642	3707689	chr17:5228417-5228664	RABEP1	9135	rs2407	chr17:5229751	NUP88,RABEP1	1e-10	local	0.0102502
3707642	3707689	chr17:5228417-5228664	RABEP1	9135	rs739767	chr17:5231404	NUP88	1e-10	local	0.0102502
3707642	3707689	chr17:5228417-5228664	RABEP1	9135	rs739768	chr17:5231426	NUP88	4e-10	local	0.00877421
3707642	3707689	chr17:5228417-5228664	RABEP1	9135	rs748486	chr17:5231547	NUP88	2e-10	local	0.0110273
3707642	3707689	chr17:5228417-5228664	RABEP1	9135	rs886361	chr17:5233485	NUP88	1e-10	local	0.0102502
3707642	3707689	chr17:5228417-5228664	RABEP1	9135	rs1806239	chr17:5236251	NUP88	3e-10	local	0.00885717
3707642	3707689	chr17:5228417-5228664	RABEP1	9135	rs17635627	chr17:5236782	NUP88	6e-12	local	0.0906065
3707642	3707689	chr17:5228417-5228664	RABEP1	9135	rs1806240	chr17:5239043	NUP88	1e-10	local	0.0102502
3707642	3707689	chr17:5228417-5228664	RABEP1	9135	rs2309372	chr17:5239119	NUP88	2e-10	local	0.00918406
3707642	3707689	chr17:5228417-5228664	RABEP1	9135	rs9789002	chr17:5239515	NUP88	1e-09	local	0.00771456
3707642	3707689	chr17:5228417-5228664	RABEP1	9135	rs12602061	chr17:5243368	NUP88	5e-10	local	0.00751966
3707642	3707689	chr17:5228417-5228664	RABEP1	9135	rs12602074	chr17:5243501	NUP88	5e-10	local	0.00395506
3707642	3707689	chr17:5228417-5228664	RABEP1	9135	rs2871210	chr17:5245750	NUP88	4e-10	local	0.00712969
3707642	3707689	chr17:5228417-5228664	RABEP1	9135	rs3026133	chr17:5249326	NUP88	2e-22	local	0.218928
3707642	3707689	chr17:5228417-5228664	RABEP1	9135	rs1806249	chr17:5251866	NUP88	1e-10	local	0.00621595
3707642	3707689	chr17:5228417-5228664	RABEP1	9135	rs929262	chr17:5252994	NUP88	3e-10	local	0.00912586
3707642	3707689	chr17:5228417-5228664	RABEP1	9135	rs1989945	chr17:5253615	NUP88	2e-09	local	0.0167423
3707642	3707689	chr17:5228417-5228664	RABEP1	9135	rs1989946	chr17:5253875	NUP88	2e-09	local	0.0167423
3707642	3707689	chr17:5228417-5228664	RABEP1	9135	rs3026142	chr17:5255812	NUP88	5e-10	local	0.0213143
3707642	3707689	chr17:5228417-5228664	RABEP1	9135	rs3026145	chr17:5257465	NUP88	7e-10	local	0.0064138
3707642	3707689	chr17:5228417-5228664	RABEP1	9135	rs1806261	chr17:5257731	NUP88	3e-12	local	0.0411429
3707642	3707689	chr17:5228417-5228664	RABEP1	9135	rs2301740	chr17:5260343	NUP88	2e-10	local	0.00918406
3707642	3707689	chr17:5228417-5228664	RABEP1	9135	rs2189336	chr17:5266885	RPAIN	6e-20	local	0.254052
3707642	3707689	chr17:5228417-5228664	RABEP1	9135	rs2189338	chr17:5267064	RPAIN	6e-10	local	0.157347
3707642	3707689	chr17:5228417-5228664	RABEP1	9135	rs3865353	chr17:5301798	DHX33	6e-10	local	0.280984
3707642	3707689	chr17:5228417-5228664	RABEP1	9135	rs3865350	chr17:5322590	DERL2	7e-09	local	0.269525
3707642	3707689	chr17:5228417-5228664	RABEP1	9135	rs2309399	chr17:5332413	MIS12	2e-09	local	0.264213
3707642	3707689	chr17:5228417-5228664	RABEP1	9135	rs5862	chr17:5343680	NLRP1	1e-08	local	0.28892
3707642	3707691	chr17:5229003-5229387	RABEP1	9135	rs9908414	chr17:5027763	ZNF594	1e-08	local	0.196949
3707642	3707691	chr17:5229003-5229387	RABEP1	9135	rs9892960	chr17:5116797		5e-18	local	0.202638
3707642	3707691	chr17:5229003-5229387	RABEP1	9135	rs1602914	chr17:5130831	RABEP1	3e-13	local	0.120424
3707642	3707691	chr17:5229003-5229387	RABEP1	9135	rs2467301	chr17:5131185	RABEP1	5e-20	local	0.224719
3707642	3707691	chr17:5229003-5229387	RABEP1	9135	rs7212681	chr17:5132250	RABEP1	3e-13	local	0.123445
3707642	3707691	chr17:5229003-5229387	RABEP1	9135	rs2641231	chr17:5133679	RABEP1	4e-20	local	0.224711
3707642	3707691	chr17:5229003-5229387	RABEP1	9135	rs2251155	chr17:5139823	RABEP1	1e-20	local	0.222527
3707642	3707691	chr17:5229003-5229387	RABEP1	9135	rs937232	chr17:5140029	RABEP1	1e-13	local	0.114976
3707642	3707691	chr17:5229003-5229387	RABEP1	9135	rs7212514	chr17:5154318	RABEP1	8e-13	local	0.113112
3707642	3707691	chr17:5229003-5229387	RABEP1	9135	rs7220835	chr17:5159463	RABEP1	6e-14	local	0.109653
3707642	3707691	chr17:5229003-5229387	RABEP1	9135	rs9894017	chr17:5162257	RABEP1	2e-08	local	0.126548
3707642	3707691	chr17:5229003-5229387	RABEP1	9135	rs10454710	chr17:5169749	RABEP1	3e-08	local	0.119144
3707642	3707691	chr17:5229003-5229387	RABEP1	9135	rs6502860	chr17:5177735	RABEP1	2e-13	local	0.106647
3707642	3707691	chr17:5229003-5229387	RABEP1	9135	rs9907108	chr17:5185617	RABEP1	2e-08	local	0.111888
3707642	3707691	chr17:5229003-5229387	RABEP1	9135	rs9903367	chr17:5189949	RABEP1	1e-13	local	0.114976
3707642	3707691	chr17:5229003-5229387	RABEP1	9135	rs7219586	chr17:5194840	RABEP1	4e-13	local	0.108173
3707642	3707691	chr17:5229003-5229387	RABEP1	9135	rs11078559	chr17:5203472	RABEP1	1e-12	local	0.12136
3707642	3707691	chr17:5229003-5229387	RABEP1	9135	rs8064959	chr17:5218452	RABEP1	4e-13	local	0.0244411
3707642	3707691	chr17:5229003-5229387	RABEP1	9135	rs1000940	chr17:5223975	RABEP1	8e-09	local	0.000409165
3707642	3707691	chr17:5229003-5229387	RABEP1	9135	rs3026109	chr17:5225203	RABEP1	2e-20	local	0.00918406
3707642	3707691	chr17:5229003-5229387	RABEP1	9135	rs1065482	chr17:5225442	RABEP1	6e-20	local	0.00684166
3707642	3707691	chr17:5229003-5229387	RABEP1	9135	rs1065483	chr17:5225493	RABEP1	8e-24	local	0.0874251
3707642	3707691	chr17:5229003-5229387	RABEP1	9135	rs3026115	chr17:5225945	RABEP1	3e-19	local	0.0248776
3707642	3707691	chr17:5229003-5229387	RABEP1	9135	rs8703	chr17:5227415	RABEP1	3e-19	local	0.0204703
3707642	3707691	chr17:5229003-5229387	RABEP1	9135	rs1058381	chr17:5228741	NUP88,RABEP1	3e-19	local	0.0128557
3707642	3707691	chr17:5229003-5229387	RABEP1	9135	rs1058400	chr17:5229517	NUP88,RABEP1	3e-20	local	0.0106013
3707642	3707691	chr17:5229003-5229387	RABEP1	9135	rs7426	chr17:5229706	NUP88,RABEP1	3e-24	local	0.0904018
3707642	3707691	chr17:5229003-5229387	RABEP1	9135	rs2407	chr17:5229751	NUP88,RABEP1	3e-20	local	0.0102502
3707642	3707691	chr17:5229003-5229387	RABEP1	9135	rs739767	chr17:5231404	NUP88	3e-20	local	0.0102502
3707642	3707691	chr17:5229003-5229387	RABEP1	9135	rs739768	chr17:5231426	NUP88	6e-20	local	0.00877421
3707642	3707691	chr17:5229003-5229387	RABEP1	9135	rs748486	chr17:5231547	NUP88	6e-20	local	0.0110273
3707642	3707691	chr17:5229003-5229387	RABEP1	9135	rs886361	chr17:5233485	NUP88	3e-20	local	0.0102502
3707642	3707691	chr17:5229003-5229387	RABEP1	9135	rs1806239	chr17:5236251	NUP88	3e-20	local	0.00885717
3707642	3707691	chr17:5229003-5229387	RABEP1	9135	rs17635627	chr17:5236782	NUP88	8e-22	local	0.0906065
3707642	3707691	chr17:5229003-5229387	RABEP1	9135	rs1806240	chr17:5239043	NUP88	3e-20	local	0.0102502
3707642	3707691	chr17:5229003-5229387	RABEP1	9135	rs2309372	chr17:5239119	NUP88	2e-20	local	0.00918406
3707642	3707691	chr17:5229003-5229387	RABEP1	9135	rs9789002	chr17:5239515	NUP88	4e-19	local	0.00771456
3707642	3707691	chr17:5229003-5229387	RABEP1	9135	rs12602061	chr17:5243368	NUP88	5e-20	local	0.00751966
3707642	3707691	chr17:5229003-5229387	RABEP1	9135	rs12602074	chr17:5243501	NUP88	1e-19	local	0.00395506
3707642	3707691	chr17:5229003-5229387	RABEP1	9135	rs2871210	chr17:5245750	NUP88	4e-20	local	0.00712969
3707642	3707691	chr17:5229003-5229387	RABEP1	9135	rs3026133	chr17:5249326	NUP88	4e-22	local	0.218928
3707642	3707691	chr17:5229003-5229387	RABEP1	9135	rs1806249	chr17:5251866	NUP88	1e-21	local	0.00621595
3707642	3707691	chr17:5229003-5229387	RABEP1	9135	rs929262	chr17:5252994	NUP88	5e-20	local	0.00912586
3707642	3707691	chr17:5229003-5229387	RABEP1	9135	rs1989945	chr17:5253615	NUP88	2e-20	local	0.0167423
3707642	3707691	chr17:5229003-5229387	RABEP1	9135	rs1989946	chr17:5253875	NUP88	2e-20	local	0.0167423
3707642	3707691	chr17:5229003-5229387	RABEP1	9135	rs3026142	chr17:5255812	NUP88	2e-19	local	0.0213143
3707642	3707691	chr17:5229003-5229387	RABEP1	9135	rs3026145	chr17:5257465	NUP88	7e-20	local	0.0064138
3707642	3707691	chr17:5229003-5229387	RABEP1	9135	rs1806261	chr17:5257731	NUP88	1e-21	local	0.0411429
3707642	3707691	chr17:5229003-5229387	RABEP1	9135	rs2301740	chr17:5260343	NUP88	2e-20	local	0.00918406
3707642	3707691	chr17:5229003-5229387	RABEP1	9135	rs1058115	chr17:5263992	NUP88,RPAIN	3e-13	local	0.0163029
3707642	3707691	chr17:5229003-5229387	RABEP1	9135	rs2189336	chr17:5266885	RPAIN	1e-17	local	0.254052
3707642	3707691	chr17:5229003-5229387	RABEP1	9135	rs2189338	chr17:5267064	RPAIN	3e-19	local	0.157347
3707642	3707691	chr17:5229003-5229387	RABEP1	9135	rs11869909	chr17:5292514	DHX33	5e-09	local	0.0190694
3707642	3707691	chr17:5229003-5229387	RABEP1	9135	rs3865353	chr17:5301798	DHX33	8e-10	local	0.280984
3707642	3707691	chr17:5229003-5229387	RABEP1	9135	rs3865350	chr17:5322590	DERL2	5e-09	local	0.269525
3707642	3707691	chr17:5229003-5229387	RABEP1	9135	rs2309399	chr17:5332413	MIS12	2e-09	local	0.264213
3707642	3707691	chr17:5229003-5229387	RABEP1	9135	rs7251874	chr19:15823508	LOC729645	1e-08	distant	0.168538
3707642	3707691	chr17:5229003-5229387	RABEP1	9135	rs2475505	chr6:40035770		4e-09	distant	0.157684
3707642	3707692	chr17:5229654-5229814	RABEP1	9135	rs11078548	chr17:4975192	USP6	2e-08	local	0.276229
3707642	3707692	chr17:5229654-5229814	RABEP1	9135	rs8073787	chr17:4983617	USP6	1e-11	local	0.166106
3707642	3707692	chr17:5229654-5229814	RABEP1	9135	rs2307139	chr17:5006728	USP6	2e-08	local	0.286137
3707642	3707692	chr17:5229654-5229814	RABEP1	9135	rs11658877	chr17:5013039	USP6	4e-09	local	0.306715
3707642	3707692	chr17:5229654-5229814	RABEP1	9135	rs2309367	chr17:5019317	USP6	2e-08	local	0.286137
3707642	3707692	chr17:5229654-5229814	RABEP1	9135	rs4115657	chr17:5026616	ZNF594	4e-09	local	0.306715
3707642	3707692	chr17:5229654-5229814	RABEP1	9135	rs9908414	chr17:5027763	ZNF594	3e-11	local	0.196949
3707642	3707692	chr17:5229654-5229814	RABEP1	9135	rs2585283	chr17:5030554	ZNF594	2e-08	local	0.286137
3707642	3707692	chr17:5229654-5229814	RABEP1	9135	rs2698812	chr17:5039128	LOC100130950	4e-09	local	0.306715
3707642	3707692	chr17:5229654-5229814	RABEP1	9135	rs2641263	chr17:5054301	C17orf87,LOC100130950	7e-10	local	0.323299
3707642	3707692	chr17:5229654-5229814	RABEP1	9135	rs9892960	chr17:5116797		2e-17	local	0.202638
3707642	3707692	chr17:5229654-5229814	RABEP1	9135	rs1602914	chr17:5130831	RABEP1	4e-12	local	0.120424
3707642	3707692	chr17:5229654-5229814	RABEP1	9135	rs2467301	chr17:5131185	RABEP1	5e-20	local	0.224719
3707642	3707692	chr17:5229654-5229814	RABEP1	9135	rs7212681	chr17:5132250	RABEP1	5e-11	local	0.123445
3707642	3707692	chr17:5229654-5229814	RABEP1	9135	rs2641231	chr17:5133679	RABEP1	1e-20	local	0.224711
3707642	3707692	chr17:5229654-5229814	RABEP1	9135	rs2251155	chr17:5139823	RABEP1	1e-20	local	0.222527
3707642	3707692	chr17:5229654-5229814	RABEP1	9135	rs937232	chr17:5140029	RABEP1	5e-12	local	0.114976
3707642	3707692	chr17:5229654-5229814	RABEP1	9135	rs7212514	chr17:5154318	RABEP1	2e-11	local	0.113112
3707642	3707692	chr17:5229654-5229814	RABEP1	9135	rs7220835	chr17:5159463	RABEP1	1e-11	local	0.109653
3707642	3707692	chr17:5229654-5229814	RABEP1	9135	rs6502860	chr17:5177735	RABEP1	1e-10	local	0.106647
3707642	3707692	chr17:5229654-5229814	RABEP1	9135	rs9903367	chr17:5189949	RABEP1	2e-11	local	0.114976
3707642	3707692	chr17:5229654-5229814	RABEP1	9135	rs7219586	chr17:5194840	RABEP1	2e-11	local	0.108173
3707642	3707692	chr17:5229654-5229814	RABEP1	9135	rs11078559	chr17:5203472	RABEP1	5e-12	local	0.12136
3707642	3707692	chr17:5229654-5229814	RABEP1	9135	rs8064959	chr17:5218452	RABEP1	1e-16	local	0.0244411
3707642	3707692	chr17:5229654-5229814	RABEP1	9135	rs3026101	chr17:5221163	RABEP1	2e-09	local	1.88537e-05
3707642	3707692	chr17:5229654-5229814	RABEP1	9135	rs1000940	chr17:5223975	RABEP1	4e-09	local	0.000409165
3707642	3707692	chr17:5229654-5229814	RABEP1	9135	rs3026109	chr17:5225203	RABEP1	7e-22	local	0.00918406
3707642	3707692	chr17:5229654-5229814	RABEP1	9135	rs1065482	chr17:5225442	RABEP1	2e-21	local	0.00684166
3707642	3707692	chr17:5229654-5229814	RABEP1	9135	rs1065483	chr17:5225493	RABEP1	2e-22	local	0.0874251
3707642	3707692	chr17:5229654-5229814	RABEP1	9135	rs3026115	chr17:5225945	RABEP1	3e-20	local	0.0248776
3707642	3707692	chr17:5229654-5229814	RABEP1	9135	rs8703	chr17:5227415	RABEP1	2e-19	local	0.0204703
3707642	3707692	chr17:5229654-5229814	RABEP1	9135	rs1058381	chr17:5228741	NUP88,RABEP1	1e-20	local	0.0128557
3707642	3707692	chr17:5229654-5229814	RABEP1	9135	rs1058400	chr17:5229517	NUP88,RABEP1	1e-21	local	0.0106013
3707642	3707692	chr17:5229654-5229814	RABEP1	9135	rs7426	chr17:5229706	NUP88,RABEP1	1e-23	local	0.0904018
3707642	3707692	chr17:5229654-5229814	RABEP1	9135	rs2407	chr17:5229751	NUP88,RABEP1	2e-21	local	0.0102502
3707642	3707692	chr17:5229654-5229814	RABEP1	9135	rs739767	chr17:5231404	NUP88	2e-21	local	0.0102502
3707642	3707692	chr17:5229654-5229814	RABEP1	9135	rs739768	chr17:5231426	NUP88	2e-21	local	0.00877421
3707642	3707692	chr17:5229654-5229814	RABEP1	9135	rs748486	chr17:5231547	NUP88	4e-21	local	0.0110273
3707642	3707692	chr17:5229654-5229814	RABEP1	9135	rs886361	chr17:5233485	NUP88	2e-21	local	0.0102502
3707642	3707692	chr17:5229654-5229814	RABEP1	9135	rs1806239	chr17:5236251	NUP88	7e-22	local	0.00885717
3707642	3707692	chr17:5229654-5229814	RABEP1	9135	rs17635627	chr17:5236782	NUP88	3e-21	local	0.0906065
3707642	3707692	chr17:5229654-5229814	RABEP1	9135	rs1806240	chr17:5239043	NUP88	2e-21	local	0.0102502
3707642	3707692	chr17:5229654-5229814	RABEP1	9135	rs2309372	chr17:5239119	NUP88	7e-22	local	0.00918406
3707642	3707692	chr17:5229654-5229814	RABEP1	9135	rs9789002	chr17:5239515	NUP88	7e-21	local	0.00771456
3707642	3707692	chr17:5229654-5229814	RABEP1	9135	rs12600578	chr17:5240673	NUP88	1e-09	local	0.00132561
3707642	3707692	chr17:5229654-5229814	RABEP1	9135	rs12602061	chr17:5243368	NUP88	1e-21	local	0.00751966
3707642	3707692	chr17:5229654-5229814	RABEP1	9135	rs12602074	chr17:5243501	NUP88	2e-21	local	0.00395506
3707642	3707692	chr17:5229654-5229814	RABEP1	9135	rs2871210	chr17:5245750	NUP88	2e-21	local	0.00712969
3707642	3707692	chr17:5229654-5229814	RABEP1	9135	rs3026133	chr17:5249326	NUP88	4e-23	local	0.218928
3707642	3707692	chr17:5229654-5229814	RABEP1	9135	rs1806249	chr17:5251866	NUP88	1e-21	local	0.00621595
3707642	3707692	chr17:5229654-5229814	RABEP1	9135	rs929262	chr17:5252994	NUP88	1e-21	local	0.00912586
3707642	3707692	chr17:5229654-5229814	RABEP1	9135	rs1989945	chr17:5253615	NUP88	2e-20	local	0.0167423
3707642	3707692	chr17:5229654-5229814	RABEP1	9135	rs1989946	chr17:5253875	NUP88	2e-20	local	0.0167423
3707642	3707692	chr17:5229654-5229814	RABEP1	9135	rs3026142	chr17:5255812	NUP88	4e-20	local	0.0213143
3707642	3707692	chr17:5229654-5229814	RABEP1	9135	rs3026145	chr17:5257465	NUP88	5e-22	local	0.0064138
3707642	3707692	chr17:5229654-5229814	RABEP1	9135	rs1806261	chr17:5257731	NUP88	1e-21	local	0.0411429
3707642	3707692	chr17:5229654-5229814	RABEP1	9135	rs2301740	chr17:5260343	NUP88	7e-22	local	0.00918406
3707642	3707692	chr17:5229654-5229814	RABEP1	9135	rs1058115	chr17:5263992	NUP88,RPAIN	2e-13	local	0.0163029
3707642	3707692	chr17:5229654-5229814	RABEP1	9135	rs2189336	chr17:5266885	RPAIN	7e-20	local	0.254052
3707642	3707692	chr17:5229654-5229814	RABEP1	9135	rs2189338	chr17:5267064	RPAIN	6e-18	local	0.157347
3707642	3707692	chr17:5229654-5229814	RABEP1	9135	rs11869909	chr17:5292514	DHX33	4e-10	local	0.0190694
3707642	3707692	chr17:5229654-5229814	RABEP1	9135	rs3865353	chr17:5301798	DHX33	2e-13	local	0.280984
3707642	3707692	chr17:5229654-5229814	RABEP1	9135	rs3865350	chr17:5322590	DERL2	3e-13	local	0.269525
3707642	3707692	chr17:5229654-5229814	RABEP1	9135	rs2309399	chr17:5332413	MIS12	2e-13	local	0.264213
3707642	3707692	chr17:5229654-5229814	RABEP1	9135	rs5862	chr17:5343680	NLRP1	4e-11	local	0.28892
3764471	3764482	chr17:53927537-53927991	MTMR4	9110	rs7706237	chr5:177311635	LOC100128340	2e-08	distant	0.241985
3766373	3766394	chr17:59254909-59254976	FTSJ3	117246	rs11658641	chr17:58964631	KCNH6	2e-13	local	0.105191
3766373	3766394	chr17:59254909-59254976	FTSJ3	117246	rs12603614	chr17:58976434	KCNH6	4e-09	local	0.0415013
3766373	3766394	chr17:59254909-59254976	FTSJ3	117246	rs3817182	chr17:59137639	LYK5	7e-19	local	0.0777778
3766373	3766394	chr17:59254909-59254976	FTSJ3	117246	rs2137144	chr17:59159338	LYK5	3e-30	local	0.123406
3766373	3766394	chr17:59254909-59254976	FTSJ3	117246	rs6504177	chr17:59166386	LYK5	4e-22	local	0.0710402
3766373	3766394	chr17:59254909-59254976	FTSJ3	117246	rs6504179	chr17:59166726	LYK5	8e-20	local	0.0585261
3766373	3766394	chr17:59254909-59254976	FTSJ3	117246	rs3020607	chr17:59340467	CSHL1	3e-17	local	0.114711
3766373	3766394	chr17:59254909-59254976	FTSJ3	117246	rs2727308	chr17:59343357		2e-18	local	0.120371
3766373	3766394	chr17:59254909-59254976	FTSJ3	117246	rs2854184	chr17:59351724		4e-16	local	0.1236
3766373	3766394	chr17:59254909-59254976	FTSJ3	117246	rs7209608	chr17:59357541		4e-11	local	0.0509114
3766373	3766394	chr17:59254909-59254976	FTSJ3	117246	rs11079515	chr17:59359376	CD79B	5e-15	local	0.124884
3766373	3766394	chr17:59254909-59254976	FTSJ3	117246	rs12946669	chr17:59359738	CD79B	5e-18	local	0.107789
3766373	3766394	chr17:59254909-59254976	FTSJ3	117246	rs2286565	chr17:59363963		1e-11	local	0.000408218
3766373	3766394	chr17:59254909-59254976	FTSJ3	117246	rs12695741	chr3:142768472	RASA2	5e-09	distant	0.0603211
3766373	3766394	chr17:59254909-59254976	FTSJ3	117246	rs7781589	chr7:162407		8e-09	distant	0.130392
3766373	3766394	chr17:59254909-59254976	FTSJ3	117246	rs3924854	chr7:162447		6e-09	distant	0.12574
3766651	3766657	chr17:59475080-59475292	ERN1	2081	rs196912	chr17:59475211	ERN1	5e-10	local	0.401934
3766651	3766657	chr17:59475080-59475292	ERN1	2081	rs77684	chr17:59480715	ERN1	1e-09	local	0.58571
3766651	3766657	chr17:59475080-59475292	ERN1	2081	rs196933	chr17:59487787	ERN1	1e-09	local	0.577033
3733590	3733610	chr17:67632684-67633630	SOX9	6662	rs4954581	chr2:136702856		6e-10	distant	0.0806251
3770743	3770754	chr17:70827700-70827728	GRB2	2885	rs7219	chr17:70826962	GRB2	1e-08	local	0.475396
3770743	3770754	chr17:70827700-70827728	GRB2	2885	rs7207618	chr17:70833281	GRB2	3e-08	local	0.367019
3770743	3770754	chr17:70827700-70827728	GRB2	2885	rs4542691	chr17:70838559	GRB2	2e-08	local	0.485996
3709244	3709260	chr17:7734615-7734700	CHD3	1107	rs296684	chr9:92760196		1e-08	distant	0.0126972
3709244	3709260	chr17:7734615-7734700	SCARNA21	677763	rs296684	chr9:92760196		1e-08	distant	0.0126972
3774635	3774683	chr17:77642058-77642188	FASN	2194	rs2141119	chr2:78138818		2e-09	distant	0.215317
3744800	3744805	chr17:9094580-9094619	STX8	9482	rs9909240	chr17:9080815	NTN1	5e-10	local	0.162896
3744800	3744805	chr17:9094580-9094619	STX8	9482	rs4791824	chr17:9093368	STX8	1e-12	local	0.0966469
3744800	3744805	chr17:9094580-9094619	STX8	9482	rs9914374	chr17:9093823	STX8	5e-13	local	0.122856
3744800	3744805	chr17:9094580-9094619	STX8	9482	rs9916063	chr17:9093898	STX8	9e-13	local	0.0648418
3744800	3744805	chr17:9094580-9094619	STX8	9482	rs8974	chr17:9094585	STX8	3e-15	local	0.170378
3744800	3744805	chr17:9094580-9094619	STX8	9482	rs17743659	chr17:9094802	STX8	8e-13	local	0.0625174
3812426	3812475	chr18:65869656-65869723	RTTN	25914	rs11151560	chr18:65862412	RTTN	2e-14	local	0.445823
3812426	3812475	chr18:65869656-65869723	RTTN	25914	rs930294	chr18:65863084	RTTN	1e-08	local	0.734623
3812426	3812475	chr18:65869656-65869723	RTTN	25914	rs12962601	chr18:65865796	RTTN	4e-09	local	0.565968
3812426	3812475	chr18:65869656-65869723	RTTN	25914	rs8089288	chr18:65868182	RTTN	4e-09	local	0.570262
3812426	3812475	chr18:65869656-65869723	RTTN	25914	rs8099717	chr18:65872730	RTTN	2e-14	local	0.453067
3812426	3812475	chr18:65869656-65869723	RTTN	25914	rs11876150	chr18:65873739	RTTN	1e-08	local	0.764589
3812426	3812475	chr18:65869656-65869723	RTTN	25914	rs12968602	chr18:65875781	RTTN	4e-09	local	0.570262
3812426	3812475	chr18:65869656-65869723	RTTN	25914	rs11664201	chr18:65886953	RTTN	1e-08	local	0.734623
3812426	3812475	chr18:65869656-65869723	RTTN	25914	rs12953952	chr18:65888906	RTTN	1e-08	local	0.732822
3821015	3821042	chr19:11088546-11088628	LDLR	3949	rs5930	chr19:11085264	LDLR	3e-11	local	0.0444582
3821015	3821042	chr19:11088546-11088628	LDLR	3949	rs6413504	chr19:11102914	LDLR	1e-14	local	0.160053
3851545	3851575	chr19:12633075-12633186	MAN2B1	4125	rs11099757	chr4:151283817	DCLK2	1e-08	distant	0.0406504
3823625	3823660	chr19:16206830-16206969	AP1M1	8907	rs7775496	chr6:23822415		3e-08	distant	0.047154
3823625	3823660	chr19:16206830-16206969	AP1M1	8907	rs1276814	chr6:23831415		3e-08	distant	0.0257141
3816112	3816139	chr19:1876827-1876970	SCAMP4	113178	rs4470667	chr4:65193448		2e-08	distant	0.030303
3829020	3829021	chr19:37763966-37764007	PDCD5	9141	rs7655536	chr4:77395791	LOC100129583	6e-10	distant	0.0350958
3832978	3832988	chr19:44591189-44591746	ZFP36	7538	rs4505490	chr2:188889578	GULP1	1e-08	distant	0.0465461
3862471	3862477	chr19:45430106-45430304	AKT2	208	rs6025744	chr20:55733951		2e-09	distant	0.0181818
3862471	3862477	chr19:45430106-45430304	AKT2	208	rs6464451	chr7:139267605	TBXAS1	1e-08	distant	0.171196
3862471	3862477	chr19:45430106-45430304	AKT2	208	rs10989922	chr9:104054437		3e-08	distant	0.0732731
3834089	3834142	chr19:46505248-46505417	HNRPUL1	11100	rs983152	chr7:144441104		7e-09	distant	0.0153749
3834089	3834142	chr19:46505248-46505417	HNRPUL1	11100	rs7808483	chr7:144446080		2e-08	distant	0.000744602
3834089	3834142	chr19:46505248-46505417	HNRPUL1	11100	rs1404959	chr7:144453333		4e-09	distant	0.00169804
3836841	3836869	chr19:51805698-51805832	CALM3	808	rs6564242	chr16:72043964		2e-08	distant	0.0116254
3838118	3838136	chr19:54205042-54205135	RUVBL2	10856	rs1062708	chr19:54205084	RUVBL2	6e-12	local	0.173095
3841474	3841503	chr19:59664558-59664967	LENG8	114823	rs305250	chr8:137689580		3e-08	distant	0.0692812
3841474	3841503	chr19:59664558-59664967	LENG8	114823	rs188607	chr8:137692671		3e-08	distant	0.0692812
3847782	3847788	chr19:6331318-6331465	GTF2F1	2962	rs13024800	chr2:73975852	ACTG2	5e-09	distant	0.105397
2540317	2540337	chr2:10850681-10850770	PDIA6	10130	rs1686482	chr2:10839966	ATP6V1C2,PDIA6	4e-28	local	0.245
2540317	2540337	chr2:10850681-10850770	PDIA6	10130	rs1198873	chr2:10841974	ATP6V1C2,PDIA6	5e-12	local	0.00459902
2540317	2540337	chr2:10850681-10850770	PDIA6	10130	rs4669625	chr2:10845837	PDIA6	1e-16	local	0.210938
2540317	2540337	chr2:10850681-10850770	PDIA6	10130	rs2952626	chr2:10846227	PDIA6	1e-16	local	0.210938
2540317	2540337	chr2:10850681-10850770	PDIA6	10130	rs1734432	chr2:10846356	PDIA6	1e-16	local	0.210938
2540317	2540337	chr2:10850681-10850770	PDIA6	10130	rs1734431	chr2:10846412	PDIA6	1e-16	local	0.210938
2540317	2540337	chr2:10850681-10850770	PDIA6	10130	rs1734430	chr2:10846583	PDIA6	1e-16	local	0.210938
2540317	2540337	chr2:10850681-10850770	PDIA6	10130	rs1734429	chr2:10846792	PDIA6	7e-13	local	0.16533
2540317	2540337	chr2:10850681-10850770	PDIA6	10130	rs1686513	chr2:10847052	PDIA6	2e-12	local	0.00404858
2540317	2540337	chr2:10850681-10850770	PDIA6	10130	rs11904084	chr2:10847317	PDIA6	1e-16	local	0.210938
2540317	2540337	chr2:10850681-10850770	PDIA6	10130	rs1686514	chr2:10847500	PDIA6	2e-16	local	0.22898
2540317	2540337	chr2:10850681-10850770	PDIA6	10130	rs2969883	chr2:10847885	PDIA6	1e-16	local	0.224462
2540317	2540337	chr2:10850681-10850770	PDIA6	10130	rs1734421	chr2:10849532	PDIA6	1e-16	local	0.210938
2540317	2540337	chr2:10850681-10850770	PDIA6	10130	rs1734422	chr2:10849657	PDIA6	8e-17	local	0.216637
2540317	2540337	chr2:10850681-10850770	PDIA6	10130	rs1734423	chr2:10849890	PDIA6	3e-16	local	0.208211
2540317	2540337	chr2:10850681-10850770	PDIA6	10130	rs1734424	chr2:10850198	PDIA6	1e-16	local	0.210938
2540317	2540337	chr2:10850681-10850770	PDIA6	10130	rs1734425	chr2:10850384	PDIA6	5e-15	local	0.238586
2540317	2540337	chr2:10850681-10850770	PDIA6	10130	rs4799	chr2:10850699	PDIA6	1e-28	local	0.197419
2540317	2540337	chr2:10850681-10850770	PDIA6	10130	rs1686520	chr2:10851274	PDIA6	1e-16	local	0.212742
2540317	2540337	chr2:10850681-10850770	PDIA6	10130	rs1625104	chr2:10851371	PDIA6	2e-11	local	0.00497334
2540317	2540337	chr2:10850681-10850770	PDIA6	10130	rs1625940	chr2:10851462	PDIA6	2e-16	local	0.222746
2540317	2540337	chr2:10850681-10850770	PDIA6	10130	rs1686447	chr2:10852674	PDIA6	1e-16	local	0.210938
2540317	2540337	chr2:10850681-10850770	PDIA6	10130	rs1686446	chr2:10853311	PDIA6	7e-17	local	0.216637
2540317	2540337	chr2:10850681-10850770	PDIA6	10130	rs1734341	chr2:10854159	PDIA6	1e-16	local	0.210938
2540317	2540337	chr2:10850681-10850770	PDIA6	10130	rs1734342	chr2:10854255	PDIA6	1e-16	local	0.210938
2540317	2540337	chr2:10850681-10850770	PDIA6	10130	rs1734343	chr2:10854487	PDIA6	3e-28	local	0.213193
2540317	2540337	chr2:10850681-10850770	PDIA6	10130	rs1686444	chr2:10854859	PDIA6	3e-16	local	0.22004
2540317	2540337	chr2:10850681-10850770	PDIA6	10130	rs1734346	chr2:10855137	PDIA6	1e-16	local	0.210938
2540317	2540337	chr2:10850681-10850770	PDIA6	10130	rs1734358	chr2:10858988	PDIA6	2e-16	local	0.219601
2540317	2540337	chr2:10850681-10850770	PDIA6	10130	rs1686436	chr2:10859194	PDIA6	6e-13	local	0.100521
2540317	2540337	chr2:10850681-10850770	PDIA6	10130	rs1686435	chr2:10859804	PDIA6	7e-16	local	0.187964
2540317	2540337	chr2:10850681-10850770	PDIA6	10130	rs1734361	chr2:10859861	PDIA6	1e-16	local	0.210938
2540317	2540337	chr2:10850681-10850770	PDIA6	10130	rs1686434	chr2:10860017	PDIA6	1e-16	local	0.210938
2540317	2540337	chr2:10850681-10850770	PDIA6	10130	rs4758	chr2:10860137	PDIA6	1e-15	local	0.225221
2540317	2540337	chr2:10850681-10850770	PDIA6	10130	rs1734365	chr2:10861332	PDIA6	1e-16	local	0.210938
2540317	2540337	chr2:10850681-10850770	PDIA6	10130	rs4669630	chr2:10864569	PDIA6	2e-16	local	0.201635
2540317	2540337	chr2:10850681-10850770	PDIA6	10130	rs1686430	chr2:10865251	PDIA6	1e-16	local	0.210938
2540317	2540337	chr2:10850681-10850770	PDIA6	10130	rs1387570	chr2:10865390	PDIA6	1e-16	local	0.210938
2540317	2540337	chr2:10850681-10850770	PDIA6	10130	rs1686426	chr2:10865998	PDIA6	1e-16	local	0.210938
2540317	2540337	chr2:10850681-10850770	PDIA6	10130	rs1686424	chr2:10866281	PDIA6	1e-16	local	0.210938
2540317	2540337	chr2:10850681-10850770	PDIA6	10130	rs1734449	chr2:10867734	PDIA6	5e-16	local	0.212955
2540317	2540337	chr2:10850681-10850770	PDIA6	10130	rs1686418	chr2:10868646	PDIA6	1e-16	local	0.210938
2540317	2540337	chr2:10850681-10850770	PDIA6	10130	rs2357821	chr2:10869361	PDIA6	9e-16	local	0.219601
2540317	2540337	chr2:10850681-10850770	PDIA6	10130	rs1626087	chr2:10880870		2e-08	local	0.00466336
2540317	2540337	chr2:10850681-10850770	PDIA6	10130	rs1106184	chr2:10880977		5e-09	local	0.0920622
2540317	2540337	chr2:10850681-10850770	PDIA6	10130	rs1734444	chr2:10886778		1e-18	local	0.229602
2540317	2540337	chr2:10850681-10850770	PDIA6	10130	rs1734443	chr2:10886893		3e-15	local	0.179568
2540317	2540337	chr2:10850681-10850770	PDIA6	10130	rs1686486	chr2:10887014		6e-09	local	0.129129
2540317	2540337	chr2:10850681-10850770	PDIA6	10130	rs7599128	chr2:83375994		1e-09	distant	0.00870667
2540317	2540337	chr2:10850681-10850770	PDIA6	10130	rs2069122	chr8:41351516		4e-09	distant	0.0136744
2540317	2540345	chr2:10855306-10855334	PDIA6	10130	rs330679	chr5:123233992		6e-09	distant	0.0588645
2540317	2540345	chr2:10855306-10855334	PDIA6	10130	rs918463	chr5:123237929		6e-09	distant	0.0588645
2540317	2540345	chr2:10855306-10855334	PDIA6	10130	rs4836051	chr5:123246064		3e-08	distant	0.0550309
2507380	2507437	chr2:136119440-136119510	R3HDM1	23518	rs7953112	chr12:30017592		3e-08	distant	0.00152488
2541230	2541373	chr2:15592123-15592187	NAG	51594	rs16861554	chr1:182059436	RGL1	7e-09	distant	0.0326416
2541230	2541373	chr2:15592123-15592187	NAG	51594	rs1641786	chr16:10725312		2e-08	distant	0.0168464
2541230	2541373	chr2:15592123-15592187	NAG	51594	rs11680706	chr2:15394825	NAG	2e-39	local	0.259022
2541230	2541373	chr2:15592123-15592187	NAG	51594	rs6431692	chr2:15395814	NAG	1e-25	local	0.130441
2541230	2541373	chr2:15592123-15592187	NAG	51594	rs2277915	chr2:15411331	NAG	1e-41	local	0.249185
2541230	2541373	chr2:15592123-15592187	NAG	51594	rs2277916	chr2:15411602	NAG	9e-22	local	0.00857487
2541230	2541373	chr2:15592123-15592187	NAG	51594	rs11902167	chr2:15411841	NAG	2e-41	local	0.258292
2541230	2541373	chr2:15592123-15592187	NAG	51594	rs13024118	chr2:15412090	NAG	5e-43	local	0.260825
2541230	2541373	chr2:15592123-15592187	NAG	51594	rs10185835	chr2:15413213	NAG	3e-23	local	0.000299043
2541230	2541373	chr2:15592123-15592187	NAG	51594	rs13014988	chr2:15415854	NAG	1e-42	local	0.268534
2541230	2541373	chr2:15592123-15592187	NAG	51594	rs11691392	chr2:15416231	NAG	7e-41	local	0.258292
2541230	2541373	chr2:15592123-15592187	NAG	51594	rs11692624	chr2:15416577	NAG	9e-24	local	0.000669693
2541230	2541373	chr2:15592123-15592187	NAG	51594	rs13015492	chr2:15423166	NAG	2e-43	local	0.259022
2541230	2541373	chr2:15592123-15592187	NAG	51594	rs12991640	chr2:15423239	NAG	5e-42	local	0.2539
2541230	2541373	chr2:15592123-15592187	NAG	51594	rs7602186	chr2:15427453	NAG	3e-23	local	0.000382559
2541230	2541373	chr2:15592123-15592187	NAG	51594	rs13019322	chr2:15428720	NAG	1e-21	local	0.00576964
2541230	2541373	chr2:15592123-15592187	NAG	51594	rs4668898	chr2:15428952	NAG	3e-28	local	0.123766
2541230	2541373	chr2:15592123-15592187	NAG	51594	rs4668899	chr2:15429025	NAG	2e-21	local	0.0056628
2541230	2541373	chr2:15592123-15592187	NAG	51594	rs4668900	chr2:15429190	NAG	2e-21	local	0.0055533
2541230	2541373	chr2:15592123-15592187	NAG	51594	rs12692260	chr2:15429259	NAG	2e-21	local	0.0056628
2541230	2541373	chr2:15592123-15592187	NAG	51594	rs12692261	chr2:15429417	NAG	7e-22	local	0.00670907
2541230	2541373	chr2:15592123-15592187	NAG	51594	rs1997304	chr2:15429523	NAG	1e-21	local	0.00576964
2541230	2541373	chr2:15592123-15592187	NAG	51594	rs2098463	chr2:15429625	NAG	2e-21	local	0.0056628
2541230	2541373	chr2:15592123-15592187	NAG	51594	rs1997305	chr2:15429833	NAG	5e-28	local	0.1268
2541230	2541373	chr2:15592123-15592187	NAG	51594	rs1997306	chr2:15429851	NAG	6e-21	local	0.0110294
2541230	2541373	chr2:15592123-15592187	NAG	51594	rs10207209	chr2:15430151	NAG	4e-21	local	0.00180232
2541230	2541373	chr2:15592123-15592187	NAG	51594	rs1035246	chr2:15430341	NAG	5e-28	local	0.120877
2541230	2541373	chr2:15592123-15592187	NAG	51594	rs11684001	chr2:15430570	NAG	1e-21	local	0.00576964
2541230	2541373	chr2:15592123-15592187	NAG	51594	rs7587257	chr2:15430706	NAG	5e-28	local	0.120877
2541230	2541373	chr2:15592123-15592187	NAG	51594	rs7596951	chr2:15430923	NAG	7e-22	local	0.00691211
2541230	2541373	chr2:15592123-15592187	NAG	51594	rs7596969	chr2:15431065	NAG	6e-27	local	0.125187
2541230	2541373	chr2:15592123-15592187	NAG	51594	rs10202600	chr2:15431911	NAG	2e-21	local	0.0056628
2541230	2541373	chr2:15592123-15592187	NAG	51594	rs10166429	chr2:15431922	NAG	7e-21	local	0.00576964
2541230	2541373	chr2:15592123-15592187	NAG	51594	rs2049720	chr2:15432432	NAG	6e-24	local	0.0904018
2541230	2541373	chr2:15592123-15592187	NAG	51594	rs2049719	chr2:15432508	NAG	9e-22	local	0.00735294
2541230	2541373	chr2:15592123-15592187	NAG	51594	rs11902128	chr2:15432719	NAG	5e-24	local	0.0943356
2541230	2541373	chr2:15592123-15592187	NAG	51594	rs4668444	chr2:15433092	NAG	4e-25	local	0.102131
2541230	2541373	chr2:15592123-15592187	NAG	51594	rs4140714	chr2:15433173	NAG	5e-24	local	0.0943356
2541230	2541373	chr2:15592123-15592187	NAG	51594	rs4668446	chr2:15433470	NAG	2e-25	local	0.119734
2541230	2541373	chr2:15592123-15592187	NAG	51594	rs4668447	chr2:15433616	NAG	2e-21	local	0.0055533
2541230	2541373	chr2:15592123-15592187	NAG	51594	rs3828464	chr2:15434168	NAG	2e-18	local	0.00130421
2541230	2541373	chr2:15592123-15592187	NAG	51594	rs1996516	chr2:15434696	NAG	1e-21	local	0.00532602
2541230	2541373	chr2:15592123-15592187	NAG	51594	rs1996517	chr2:15434780	NAG	4e-21	local	0.00520805
2541230	2541373	chr2:15592123-15592187	NAG	51594	rs1996518	chr2:15434869	NAG	1e-21	local	0.00576964
2541230	2541373	chr2:15592123-15592187	NAG	51594	rs3805103	chr2:15435802	NAG	8e-19	local	0.0181104
2541230	2541373	chr2:15592123-15592187	NAG	51594	rs2049718	chr2:15436039	NAG	2e-21	local	0.0055533
2541230	2541373	chr2:15592123-15592187	NAG	51594	rs763356	chr2:15436266	NAG	1e-21	local	0.00576964
2541230	2541373	chr2:15592123-15592187	NAG	51594	rs763355	chr2:15436288	NAG	8e-19	local	0.0181104
2541230	2541373	chr2:15592123-15592187	NAG	51594	rs2160696	chr2:15436433	NAG	4e-21	local	0.00180232
2541230	2541373	chr2:15592123-15592187	NAG	51594	rs2058866	chr2:15437442	NAG	1e-21	local	0.006812
2541230	2541373	chr2:15592123-15592187	NAG	51594	rs2058867	chr2:15437603	NAG	4e-21	local	0.00180232
2541230	2541373	chr2:15592123-15592187	NAG	51594	rs6748451	chr2:15438538	NAG	1e-20	local	0.00405718
2541230	2541373	chr2:15592123-15592187	NAG	51594	rs13001923	chr2:15438714	NAG	2e-21	local	0.0055533
2541230	2541373	chr2:15592123-15592187	NAG	51594	rs10172344	chr2:15439041	NAG	3e-21	local	0.0345379
2541230	2541373	chr2:15592123-15592187	NAG	51594	rs4668901	chr2:15439127	NAG	7e-20	local	0.00499235
2541230	2541373	chr2:15592123-15592187	NAG	51594	rs4668448	chr2:15439190	NAG	1e-23	local	0.000170158
2541230	2541373	chr2:15592123-15592187	NAG	51594	rs7578126	chr2:15440222	NAG	3e-21	local	0.0345379
2541230	2541373	chr2:15592123-15592187	NAG	51594	rs6431694	chr2:15440481	NAG	3e-19	local	0.0206122
2541230	2541373	chr2:15592123-15592187	NAG	51594	rs3755129	chr2:15440999	NAG	1e-21	local	0.00576964
2541230	2541373	chr2:15592123-15592187	NAG	51594	rs1019358	chr2:15441492	NAG	1e-21	local	0.00576964
2541230	2541373	chr2:15592123-15592187	NAG	51594	rs1019359	chr2:15442065	NAG	1e-21	local	0.006812
2541230	2541373	chr2:15592123-15592187	NAG	51594	rs1019360	chr2:15442191	NAG	8e-20	local	0.00847713
2541230	2541373	chr2:15592123-15592187	NAG	51594	rs6733695	chr2:15443164	NAG	2e-21	local	0.0055533
2541230	2541373	chr2:15592123-15592187	NAG	51594	rs6718736	chr2:15443325	NAG	1e-21	local	0.00243606
2541230	2541373	chr2:15592123-15592187	NAG	51594	rs6734288	chr2:15443672	NAG	4e-19	local	0.0104895
2541230	2541373	chr2:15592123-15592187	NAG	51594	rs4459705	chr2:15444034	NAG	2e-21	local	0.00608182
2541230	2541373	chr2:15592123-15592187	NAG	51594	rs6737962	chr2:15444448	NAG	5e-20	local	0.0232665
2541230	2541373	chr2:15592123-15592187	NAG	51594	rs6722963	chr2:15444555	NAG	2e-21	local	0.00608182
2541230	2541373	chr2:15592123-15592187	NAG	51594	rs11689686	chr2:15445109	NAG	2e-21	local	0.00608182
2541230	2541373	chr2:15592123-15592187	NAG	51594	rs9677636	chr2:15445212	NAG	1e-20	local	0.00158021
2541230	2541373	chr2:15592123-15592187	NAG	51594	rs7577436	chr2:15445731	NAG	4e-28	local	0.131819
2541230	2541373	chr2:15592123-15592187	NAG	51594	rs10166702	chr2:15445904	NAG	3e-21	local	0.00641369
2541230	2541373	chr2:15592123-15592187	NAG	51594	rs6731349	chr2:15446501	NAG	8e-21	local	0.0327266
2541230	2541373	chr2:15592123-15592187	NAG	51594	rs6759785	chr2:15446719	NAG	5e-21	local	0.00197901
2541230	2541373	chr2:15592123-15592187	NAG	51594	rs6705287	chr2:15446818	NAG	3e-23	local	0.000230403
2541230	2541373	chr2:15592123-15592187	NAG	51594	rs6749663	chr2:15447155	NAG	3e-22	local	0.0426266
2541230	2541373	chr2:15592123-15592187	NAG	51594	rs4668903	chr2:15447501	NAG	4e-21	local	0.00180232
2541230	2541373	chr2:15592123-15592187	NAG	51594	rs4668449	chr2:15447591	NAG	4e-21	local	0.00180232
2541230	2541373	chr2:15592123-15592187	NAG	51594	rs11694458	chr2:15447919	NAG	3e-23	local	0.000230403
2541230	2541373	chr2:15592123-15592187	NAG	51594	rs10929365	chr2:15449076	NAG	2e-18	local	0.0198346
2541230	2541373	chr2:15592123-15592187	NAG	51594	rs2380649	chr2:15450062	NAG	2e-21	local	0.00608182
2541230	2541373	chr2:15592123-15592187	NAG	51594	rs11682528	chr2:15450633	NAG	7e-17	local	0.0237587
2541230	2541373	chr2:15592123-15592187	NAG	51594	rs2178238	chr2:15450970	NAG	5e-21	local	0.00197901
2541230	2541373	chr2:15592123-15592187	NAG	51594	rs2380650	chr2:15451139	NAG	5e-21	local	0.00197901
2541230	2541373	chr2:15592123-15592187	NAG	51594	rs9710889	chr2:15451229	NAG	6e-21	local	0.00197901
2541230	2541373	chr2:15592123-15592187	NAG	51594	rs9710962	chr2:15451334	NAG	1e-20	local	0.00237858
2541230	2541373	chr2:15592123-15592187	NAG	51594	rs11678132	chr2:15451448	NAG	5e-21	local	0.00197901
2541230	2541373	chr2:15592123-15592187	NAG	51594	rs3792579	chr2:15452173	NAG	4e-21	local	0.00180232
2541230	2541373	chr2:15592123-15592187	NAG	51594	rs3805104	chr2:15452597	NAG	2e-42	local	0.260159
2541230	2541373	chr2:15592123-15592187	NAG	51594	rs3805105	chr2:15452762	NAG	3e-23	local	0.000382559
2541230	2541373	chr2:15592123-15592187	NAG	51594	rs6708288	chr2:15452927	NAG	7e-21	local	0.00169489
2541230	2541373	chr2:15592123-15592187	NAG	51594	rs3828465	chr2:15452947	NAG	5e-21	local	0.00169489
2541230	2541373	chr2:15592123-15592187	NAG	51594	rs3805106	chr2:15453313	NAG	6e-19	local	0.000805588
2541230	2541373	chr2:15592123-15592187	NAG	51594	rs7590198	chr2:15453764	NAG	5e-21	local	0.00169489
2541230	2541373	chr2:15592123-15592187	NAG	51594	rs3732001	chr2:15454322	NAG	1e-21	local	0.00576964
2541230	2541373	chr2:15592123-15592187	NAG	51594	rs11674824	chr2:15454879	NAG	5e-21	local	0.00169489
2541230	2541373	chr2:15592123-15592187	NAG	51594	rs13017859	chr2:15455091	NAG	5e-21	local	0.00169489
2541230	2541373	chr2:15592123-15592187	NAG	51594	rs6745731	chr2:15455365	NAG	2e-21	local	0.0055533
2541230	2541373	chr2:15592123-15592187	NAG	51594	rs6717492	chr2:15455621	NAG	5e-21	local	0.00169489
2541230	2541373	chr2:15592123-15592187	NAG	51594	rs12692262	chr2:15456534	NAG	2e-21	local	0.0341082
2541230	2541373	chr2:15592123-15592187	NAG	51594	rs12692263	chr2:15456656	NAG	5e-21	local	0.00169489
2541230	2541373	chr2:15592123-15592187	NAG	51594	rs6753675	chr2:15457156	NAG	5e-21	local	0.000108198
2541230	2541373	chr2:15592123-15592187	NAG	51594	rs6431698	chr2:15457606	NAG	2e-21	local	0.0341082
2541230	2541373	chr2:15592123-15592187	NAG	51594	rs10179754	chr2:15458664	NAG	4e-21	local	7.25953e-05
2541230	2541373	chr2:15592123-15592187	NAG	51594	rs10179765	chr2:15458699	NAG	4e-20	local	0.00107933
2541230	2541373	chr2:15592123-15592187	NAG	51594	rs12692265	chr2:15462448	NAG	1e-21	local	3.44381e-06
2541230	2541373	chr2:15592123-15592187	NAG	51594	rs7568874	chr2:15463811	NAG	2e-21	local	0.0336953
2541230	2541373	chr2:15592123-15592187	NAG	51594	rs2031011	chr2:15465840	NAG	7e-27	local	0.318121
2541230	2541373	chr2:15592123-15592187	NAG	51594	rs1852751	chr2:15474770	NAG	5e-20	local	0.00258695
2541230	2541373	chr2:15592123-15592187	NAG	51594	rs11691286	chr2:15476030	NAG	1e-19	local	0.00205263
2541230	2541373	chr2:15592123-15592187	NAG	51594	rs11692646	chr2:15476648	NAG	2e-23	local	0.000296296
2541230	2541373	chr2:15592123-15592187	NAG	51594	rs765432	chr2:15478890	NAG	5e-19	local	0.0179574
2541230	2541373	chr2:15592123-15592187	NAG	51594	rs11676730	chr2:15481023	NAG	7e-42	local	0.230317
2541230	2541373	chr2:15592123-15592187	NAG	51594	rs10929367	chr2:15482168	NAG	2e-22	local	0.00169497
2541230	2541373	chr2:15592123-15592187	NAG	51594	rs6748427	chr2:15482249	NAG	4e-21	local	0.0421433
2541230	2541373	chr2:15592123-15592187	NAG	51594	rs6733847	chr2:15482380	NAG	1e-20	local	0.00260417
2541230	2541373	chr2:15592123-15592187	NAG	51594	rs6749063	chr2:15482728	NAG	6e-21	local	0.00197901
2541230	2541373	chr2:15592123-15592187	NAG	51594	rs1919292	chr2:15484686	NAG	3e-43	local	0.259022
2541230	2541373	chr2:15592123-15592187	NAG	51594	rs3796002	chr2:15485099	NAG	4e-22	local	7.37518e-05
2541230	2541373	chr2:15592123-15592187	NAG	51594	rs11675921	chr2:15486826	NAG	3e-43	local	0.259022
2541230	2541373	chr2:15592123-15592187	NAG	51594	rs6719652	chr2:15489129	NAG	3e-43	local	0.241375
2541230	2541373	chr2:15592123-15592187	NAG	51594	rs12692267	chr2:15490284	NAG	4e-20	local	0.00258695
2541230	2541373	chr2:15592123-15592187	NAG	51594	rs6728145	chr2:15490939	NAG	4e-22	local	7.37518e-05
2541230	2541373	chr2:15592123-15592187	NAG	51594	rs7586201	chr2:15493185	NAG	5e-19	local	0.0179574
2541230	2541373	chr2:15592123-15592187	NAG	51594	rs1473178	chr2:15494200	NAG	2e-23	local	0.0476925
2541230	2541373	chr2:15592123-15592187	NAG	51594	rs7580672	chr2:15504096	NAG	5e-19	local	0.0179574
2541230	2541373	chr2:15592123-15592187	NAG	51594	rs4668908	chr2:15506740	NAG	7e-37	local	0.258481
2541230	2541373	chr2:15592123-15592187	NAG	51594	rs6723148	chr2:15509469	NAG	5e-19	local	0.0185014
2541230	2541373	chr2:15592123-15592187	NAG	51594	rs4410258	chr2:15512434	NAG	5e-19	local	0.0179574
2541230	2541373	chr2:15592123-15592187	NAG	51594	rs7568678	chr2:15513653	NAG	5e-19	local	0.0179574
2541230	2541373	chr2:15592123-15592187	NAG	51594	rs9287664	chr2:15514566	NAG	5e-19	local	0.0179574
2541230	2541373	chr2:15592123-15592187	NAG	51594	rs2111458	chr2:15515489	NAG	3e-18	local	0.010181
2541230	2541373	chr2:15592123-15592187	NAG	51594	rs6431705	chr2:15517438	NAG	3e-18	local	0.010181
2541230	2541373	chr2:15592123-15592187	NAG	51594	rs7590340	chr2:15518891	NAG	6e-20	local	0.00235661
2541230	2541373	chr2:15592123-15592187	NAG	51594	rs7590458	chr2:15519024	NAG	4e-20	local	0.00258695
2541230	2541373	chr2:15592123-15592187	NAG	51594	rs13410044	chr2:15519985	NAG	1e-19	local	0.00205263
2541230	2541373	chr2:15592123-15592187	NAG	51594	rs13384921	chr2:15520290	NAG	5e-20	local	0.00502582
2541230	2541373	chr2:15592123-15592187	NAG	51594	rs7589238	chr2:15523859	NAG	4e-18	local	0.0137989
2541230	2541373	chr2:15592123-15592187	NAG	51594	rs11893253	chr2:15524068	NAG	2e-42	local	0.260159
2541230	2541373	chr2:15592123-15592187	NAG	51594	rs4668909	chr2:15525292	NAG	3e-43	local	0.259022
2541230	2541373	chr2:15592123-15592187	NAG	51594	rs12692270	chr2:15527256	NAG	3e-21	local	0.000568567
2541230	2541373	chr2:15592123-15592187	NAG	51594	rs4668911	chr2:15528100	NAG	1e-18	local	0.00895396
2541230	2541373	chr2:15592123-15592187	NAG	51594	rs4668912	chr2:15528332	NAG	4e-18	local	0.0137989
2541230	2541373	chr2:15592123-15592187	NAG	51594	rs1990753	chr2:15529853	NAG	5e-18	local	0.0142774
2541230	2541373	chr2:15592123-15592187	NAG	51594	rs11688071	chr2:15530076	NAG	4e-43	local	0.260825
2541230	2541373	chr2:15592123-15592187	NAG	51594	rs11693457	chr2:15530133	NAG	3e-19	local	0.00129988
2541230	2541373	chr2:15592123-15592187	NAG	51594	rs11898971	chr2:15531128	NAG	3e-17	local	0.00700951
2541230	2541373	chr2:15592123-15592187	NAG	51594	rs11893303	chr2:15531165	NAG	6e-18	local	0.0137989
2541230	2541373	chr2:15592123-15592187	NAG	51594	rs11893272	chr2:15531246	NAG	3e-21	local	0.000805588
2541230	2541373	chr2:15592123-15592187	NAG	51594	rs11900088	chr2:15531444	NAG	6e-18	local	0.0137989
2541230	2541373	chr2:15592123-15592187	NAG	51594	rs13014906	chr2:15531854	NAG	1e-19	local	0.00445724
2541230	2541373	chr2:15592123-15592187	NAG	51594	rs10168299	chr2:15532513	NAG	6e-18	local	0.0137989
2541230	2541373	chr2:15592123-15592187	NAG	51594	rs1990754	chr2:15533360	NAG	4e-18	local	0.0137989
2541230	2541373	chr2:15592123-15592187	NAG	51594	rs1990755	chr2:15533463	NAG	4e-18	local	0.0122864
2541230	2541373	chr2:15592123-15592187	NAG	51594	rs1990756	chr2:15533480	NAG	6e-18	local	0.0137989
2541230	2541373	chr2:15592123-15592187	NAG	51594	rs2111449	chr2:15533665	NAG	8e-15	local	0.0120615
2541230	2541373	chr2:15592123-15592187	NAG	51594	rs1549015	chr2:15533908	NAG	4e-18	local	0.0137989
2541230	2541373	chr2:15592123-15592187	NAG	51594	rs1549017	chr2:15534467	NAG	4e-18	local	0.00847713
2541230	2541373	chr2:15592123-15592187	NAG	51594	rs1125533	chr2:15535201	NAG	4e-18	local	0.0122864
2541230	2541373	chr2:15592123-15592187	NAG	51594	rs1125534	chr2:15535789	NAG	3e-19	local	0.00115741
2541230	2541373	chr2:15592123-15592187	NAG	51594	rs11689269	chr2:15539367	NAG	7e-23	local	0.0427166
2541230	2541373	chr2:15592123-15592187	NAG	51594	rs7577512	chr2:15540668	NAG	3e-21	local	0.000805588
2541230	2541373	chr2:15592123-15592187	NAG	51594	rs11901455	chr2:15541338	NAG	6e-44	local	0.266712
2541230	2541373	chr2:15592123-15592187	NAG	51594	rs2287260	chr2:15542260	NAG	3e-43	local	0.259022
2541230	2541373	chr2:15592123-15592187	NAG	51594	rs1861768	chr2:15542636	NAG	3e-18	local	0.000763246
2541230	2541373	chr2:15592123-15592187	NAG	51594	rs3815597	chr2:15542854	NAG	2e-21	local	0.000600617
2541230	2541373	chr2:15592123-15592187	NAG	51594	rs1015835	chr2:15543218	NAG	3e-19	local	0.00115741
2541230	2541373	chr2:15592123-15592187	NAG	51594	rs1024870	chr2:15543296	NAG	4e-22	local	0.0400445
2541230	2541373	chr2:15592123-15592187	NAG	51594	rs1024871	chr2:15543612	NAG	1e-18	local	0.00181488
2541230	2541373	chr2:15592123-15592187	NAG	51594	rs741437	chr2:15543777	NAG	1e-18	local	0.00181488
2541230	2541373	chr2:15592123-15592187	NAG	51594	rs6752546	chr2:15548179	NAG	2e-21	local	0.000669693
2541230	2541373	chr2:15592123-15592187	NAG	51594	rs9973946	chr2:15548472	NAG	2e-17	local	0.0118918
2541230	2541373	chr2:15592123-15592187	NAG	51594	rs2380653	chr2:15552461	NAG	2e-21	local	0.000669693
2541230	2541373	chr2:15592123-15592187	NAG	51594	rs2160692	chr2:15554946	LOC100128329,NAG	3e-19	local	0.00115741
2541230	2541373	chr2:15592123-15592187	NAG	51594	rs6431709	chr2:15555746	LOC100128329,NAG	4e-18	local	0.0137989
2541230	2541373	chr2:15592123-15592187	NAG	51594	rs11682246	chr2:15560279	NAG	4e-16	local	0.00585133
2541230	2541373	chr2:15592123-15592187	NAG	51594	rs13032011	chr2:15561283	NAG	3e-16	local	9.41708e-05
2541230	2541373	chr2:15592123-15592187	NAG	51594	rs2287265	chr2:15561851	NAG	6e-19	local	0.00466336
2541230	2541373	chr2:15592123-15592187	NAG	51594	rs10190876	chr2:15564235	NAG	7e-19	local	0.00448982
2541230	2541373	chr2:15592123-15592187	NAG	51594	rs10193326	chr2:15564405	NAG	2e-15	local	0.00627178
2541230	2541373	chr2:15592123-15592187	NAG	51594	rs767624	chr2:15565669	NAG	7e-19	local	0.00448982
2541230	2541373	chr2:15592123-15592187	NAG	51594	rs7587665	chr2:15565895	NAG	6e-19	local	0.00466336
2541230	2541373	chr2:15592123-15592187	NAG	51594	rs7588125	chr2:15566292	NAG	6e-17	local	0.00246351
2541230	2541373	chr2:15592123-15592187	NAG	51594	rs1978369	chr2:15566608	NAG	9e-19	local	0.00483092
2541230	2541373	chr2:15592123-15592187	NAG	51594	rs4430912	chr2:15566691	NAG	7e-19	local	0.00448982
2541230	2541373	chr2:15592123-15592187	NAG	51594	rs1978371	chr2:15566992	NAG	6e-19	local	0.00466336
2541230	2541373	chr2:15592123-15592187	NAG	51594	rs2287271	chr2:15568247	NAG	5e-19	local	0.00466639
2541230	2541373	chr2:15592123-15592187	NAG	51594	rs2287272	chr2:15569296	NAG	1e-18	local	0.00559142
2541230	2541373	chr2:15592123-15592187	NAG	51594	rs2160693	chr2:15572119	NAG	8e-21	local	0.000936305
2541230	2541373	chr2:15592123-15592187	NAG	51594	rs7578787	chr2:15572569	NAG	4e-21	local	0.000568567
2541230	2541373	chr2:15592123-15592187	NAG	51594	rs11687253	chr2:15573319	NAG	2e-41	local	0.221271
2541230	2541373	chr2:15592123-15592187	NAG	51594	rs2241237	chr2:15573607	NAG	3e-21	local	0.000568567
2541230	2541373	chr2:15592123-15592187	NAG	51594	rs2241238	chr2:15574010	NAG	4e-21	local	0.0012992
2541230	2541373	chr2:15592123-15592187	NAG	51594	rs722328	chr2:15574614	NAG	2e-21	local	0.000669693
2541230	2541373	chr2:15592123-15592187	NAG	51594	rs722327	chr2:15574713	NAG	3e-18	local	0.00313798
2541230	2541373	chr2:15592123-15592187	NAG	51594	rs918157	chr2:15575179	NAG	3e-21	local	0.000694284
2541230	2541373	chr2:15592123-15592187	NAG	51594	rs2287273	chr2:15575973	NAG	2e-21	local	0.000669693
2541230	2541373	chr2:15592123-15592187	NAG	51594	rs2287274	chr2:15576027	NAG	5e-32	local	0.243557
2541230	2541373	chr2:15592123-15592187	NAG	51594	rs13019216	chr2:15576989	NAG	3e-21	local	0.000568567
2541230	2541373	chr2:15592123-15592187	NAG	51594	rs2287276	chr2:15577704	NAG	2e-21	local	0.000669693
2541230	2541373	chr2:15592123-15592187	NAG	51594	rs4668917	chr2:15579265	NAG	2e-20	local	0.00484994
2541230	2541373	chr2:15592123-15592187	NAG	51594	rs4668918	chr2:15579442	NAG	3e-21	local	0.000568567
2541230	2541373	chr2:15592123-15592187	NAG	51594	rs4668919	chr2:15579621	NAG	3e-44	local	0.205574
2541230	2541373	chr2:15592123-15592187	NAG	51594	rs10929371	chr2:15579749	NAG	7e-19	local	0.0007854
2541230	2541373	chr2:15592123-15592187	NAG	51594	rs10929372	chr2:15579884	NAG	2e-20	local	0.00484994
2541230	2541373	chr2:15592123-15592187	NAG	51594	rs13004154	chr2:15581775	NAG	6e-38	local	0.181223
2541230	2541373	chr2:15592123-15592187	NAG	51594	rs1015836	chr2:15583169	NAG	3e-45	local	0.209548
2541230	2541373	chr2:15592123-15592187	NAG	51594	rs1015837	chr2:15583297	NAG	7e-44	local	0.209079
2541230	2541373	chr2:15592123-15592187	NAG	51594	rs9287665	chr2:15584713	NAG	3e-21	local	0.000568567
2541230	2541373	chr2:15592123-15592187	NAG	51594	rs10432400	chr2:15584774	NAG	9e-45	local	0.21476
2541230	2541373	chr2:15592123-15592187	NAG	51594	rs6710456	chr2:15587389	NAG	3e-35	local	0.176513
2541230	2541373	chr2:15592123-15592187	NAG	51594	rs7604816	chr2:15588461	NAG	2e-20	local	0.00457143
2541230	2541373	chr2:15592123-15592187	NAG	51594	rs4668921	chr2:15589521	NAG	2e-21	local	0.00138763
2541230	2541373	chr2:15592123-15592187	NAG	51594	rs2111453	chr2:15590698	NAG	1e-20	local	0.00109592
2541230	2541373	chr2:15592123-15592187	NAG	51594	rs2160695	chr2:15590928	NAG	2e-21	local	0.000669693
2541230	2541373	chr2:15592123-15592187	NAG	51594	rs11892720	chr2:15591717	NAG	4e-43	local	0.259022
2541230	2541373	chr2:15592123-15592187	NAG	51594	rs13002869	chr2:15591839	NAG	2e-17	local	0.00255837
2541230	2541373	chr2:15592123-15592187	NAG	51594	rs13029846	chr2:15592136	NAG	1e-44	local	0.20392
2541230	2541373	chr2:15592123-15592187	NAG	51594	rs11694485	chr2:15593604	NAG	3e-21	local	0.000669693
2541230	2541373	chr2:15592123-15592187	NAG	51594	rs10164574	chr2:15594708	NAG	2e-20	local	0.00457143
2541230	2541373	chr2:15592123-15592187	NAG	51594	rs7595512	chr2:15595818	NAG	3e-20	local	0.00473233
2541230	2541373	chr2:15592123-15592187	NAG	51594	rs2380657	chr2:15595932	NAG	1e-20	local	0.00457143
2541230	2541373	chr2:15592123-15592187	NAG	51594	rs2058869	chr2:15597150	NAG	2e-21	local	0.000669693
2541230	2541373	chr2:15592123-15592187	NAG	51594	rs4668923	chr2:15598677	NAG	2e-21	local	0.000669693
2541230	2541373	chr2:15592123-15592187	NAG	51594	rs7579714	chr2:15604319	NAG	2e-21	local	0.00109645
2541230	2541373	chr2:15592123-15592187	NAG	51594	rs2052435	chr2:15604756	NAG	2e-41	local	0.221271
2541230	2541373	chr2:15592123-15592187	NAG	51594	rs7567750	chr2:15607862	NAG	5e-22	local	0.000253091
2541230	2541373	chr2:15592123-15592187	NAG	51594	rs7568459	chr2:15608476	NAG	2e-21	local	0.000669693
2541230	2541373	chr2:15592123-15592187	NAG	51594	rs6431712	chr2:15608742	NAG	4e-21	local	0.000837756
2541230	2541373	chr2:15592123-15592187	NAG	51594	rs6431713	chr2:15608832	NAG	1e-20	local	0.00457143
2541230	2541373	chr2:15592123-15592187	NAG	51594	rs6740183	chr2:15610033	NAG	2e-21	local	0.000669693
2541230	2541373	chr2:15592123-15592187	NAG	51594	rs10929376	chr2:15610306	NAG	2e-21	local	0.000669693
2541230	2541373	chr2:15592123-15592187	NAG	51594	rs6725454	chr2:15610329	NAG	2e-21	local	0.000669693
2541230	2541373	chr2:15592123-15592187	NAG	51594	rs13026732	chr2:15612879	NAG	4e-40	local	0.241112
2541230	2541373	chr2:15592123-15592187	NAG	51594	rs13022830	chr2:15613992	NAG	2e-41	local	0.221271
2541230	2541373	chr2:15592123-15592187	NAG	51594	rs7425203	chr2:15614860	NAG	2e-19	local	0.00180232
2541230	2541373	chr2:15592123-15592187	NAG	51594	rs2052436	chr2:15614968	NAG	2e-41	local	0.221271
2541230	2541373	chr2:15592123-15592187	NAG	51594	rs2052437	chr2:15615269	NAG	2e-39	local	0.187514
2541230	2541373	chr2:15592123-15592187	NAG	51594	rs13035937	chr2:15615500	NAG	3e-21	local	0
2541230	2541373	chr2:15592123-15592187	NAG	51594	rs7574879	chr2:15615533	NAG	3e-21	local	7.31475e-05
2541230	2541373	chr2:15592123-15592187	NAG	51594	rs13016997	chr2:15616690	NAG	1e-19	local	0.00115741
2541230	2541373	chr2:15592123-15592187	NAG	51594	rs13017772	chr2:15617110	NAG	5e-21	local	0.000112086
2541230	2541373	chr2:15592123-15592187	NAG	51594	rs13017972	chr2:15617189	NAG	3e-21	local	7.31475e-05
2541230	2541373	chr2:15592123-15592187	NAG	51594	rs13024782	chr2:15618165	NAG	1e-36	local	0.180845
2541230	2541373	chr2:15592123-15592187	NAG	51594	rs13006997	chr2:15618322	NAG	2e-41	local	0.221271
2541230	2541373	chr2:15592123-15592187	NAG	51594	rs2276664	chr2:15618452	NAG	2e-41	local	0.221271
2541230	2541373	chr2:15592123-15592187	NAG	51594	rs13030859	chr2:15618488	NAG	2e-41	local	0.221271
2541230	2541373	chr2:15592123-15592187	NAG	51594	rs2052438	chr2:15619401	NAG	2e-41	local	0.221271
2541230	2541373	chr2:15592123-15592187	NAG	51594	rs2052439	chr2:15619479		5e-19	local	0.00194841
2541230	2541373	chr2:15592123-15592187	NAG	51594	rs879972	chr2:15620481		2e-40	local	0.246723
2541230	2541373	chr2:15592123-15592187	NAG	51594	rs2287635	chr2:15621860		2e-39	local	0.187514
2541230	2541373	chr2:15592123-15592187	NAG	51594	rs4668926	chr2:15622394		2e-41	local	0.221271
2541230	2541373	chr2:15592123-15592187	NAG	51594	rs4668927	chr2:15624133		2e-19	local	0.000653358
2541230	2541373	chr2:15592123-15592187	NAG	51594	rs13007310	chr2:15627508		3e-21	local	0
2541230	2541373	chr2:15592123-15592187	NAG	51594	rs12692275	chr2:15634231		3e-19	local	0.000235377
2541230	2541373	chr2:15592123-15592187	NAG	51594	rs6431715	chr2:15635367		8e-19	local	0.000289352
2541230	2541373	chr2:15592123-15592187	NAG	51594	rs6734024	chr2:15635630		6e-21	local	0.000116147
2541230	2541373	chr2:15592123-15592187	NAG	51594	rs4668929	chr2:15636494		4e-41	local	0.218412
2541230	2541373	chr2:15592123-15592187	NAG	51594	rs7590540	chr2:15637102		2e-27	local	0.15411
2541230	2541373	chr2:15592123-15592187	NAG	51594	rs7591019	chr2:15637481		1e-27	local	0.157347
2541230	2541373	chr2:15592123-15592187	NAG	51594	rs10810020	chr9:13742126		1e-09	distant	0.0812891
2541230	2541373	chr2:15592123-15592187	NAG	51594	rs1034167	chr9:13760465		9e-09	distant	0.01473
2584207	2584215	chr2:162837044-162837128	IFIH1	64135	rs3747517	chr2:162837069	IFIH1	3e-08	local	0.0336134
2584207	2584215	chr2:162837044-162837128	IFIH1	64135	rs6754757	chr2:85220481	TCF7L1	2e-08	distant	0.018187
2587841	2587858	chr2:175140048-175140142	WASPIP	7456	rs347283	chr1:160578606	NOS1AP	3e-08	distant	0.145068
2474341	2474381	chr2:27313144-27313194	CAD	790	rs7597712	chr2:192361596		7e-09	distant	0.211028
2474341	2474381	chr2:27313144-27313194	CAD	790	rs10209188	chr2:192362252		7e-09	distant	0.211028
2474341	2474381	chr2:27313144-27313194	CAD	790	rs12693613	chr2:192362867		7e-09	distant	0.211028
2474341	2474381	chr2:27313144-27313194	CAD	790	rs7572034	chr2:192365512	hCG_2045843	7e-09	distant	0.211028
2474341	2474383	chr2:27314115-27314236	CAD	790	rs7597712	chr2:192361596		3e-08	distant	0.211028
2474341	2474383	chr2:27314115-27314236	CAD	790	rs10209188	chr2:192362252		3e-08	distant	0.211028
2474341	2474383	chr2:27314115-27314236	CAD	790	rs12693613	chr2:192362867		3e-08	distant	0.211028
2474341	2474383	chr2:27314115-27314236	CAD	790	rs7572034	chr2:192365512	hCG_2045843	3e-08	distant	0.211028
2474341	2474383	chr2:27314115-27314236	CAD	790	rs12480446	chr20:295458		2e-08	distant	0.13257
2474341	2474383	chr2:27314115-27314236	CAD	790	rs12479683	chr20:295557		1e-08	distant	0.120475
2560122	2560131	chr2:74543838-74543954	GCS1	7841	rs2268417	chr2:74536019	ZNHIT4	1e-08	local	0.695217
2560122	2560131	chr2:74543838-74543954	GCS1	7841	rs1063588	chr2:74543885	GCS1	5e-22	local	0.60167
2560122	2560131	chr2:74543838-74543954	GCS1	7841	rs1047911	chr2:74553285	CCDC142,MRPL53	6e-19	local	0.577033
2560122	2560131	chr2:74543838-74543954	GCS1	7841	rs2301984	chr2:74574562	TTC31	1e-08	local	0.695217
2560122	2560131	chr2:74543838-74543954	GCS1	7841	rs11676323	chr2:74582988	LBX2,hCG_1811732	9e-15	local	0.507694
2565262	2565321	chr2:96328076-96328164	ASCC3L1	23020	rs28950772	chr2:51558220		1e-08	distant	0.112176
2565262	2565321	chr2:96328076-96328164	ASCC3L1	23020	rs1919417	chr2:51563806		1e-08	distant	0.205294
2565262	2565329	chr2:96331015-96331136	ASCC3L1	23020	rs1876794	chr11:118949225		1e-08	distant	0.0158106
2494537	2494578	chr2:96582042-96582092	ARID5A	10865	rs1875724	chr11:19088954		3e-10	distant	0.287126
2494537	2494578	chr2:96582042-96582092	ARID5A	10865	rs12949506	chr17:1040041		2e-08	distant	0.0287439
2494537	2494578	chr2:96582042-96582092	ARID5A	10865	rs728586	chr4:54269230		1e-08	distant	0.00102564
2495881	2495904	chr2:99344317-99344488	EIF5B	9669	rs12592205	chr15:97308118	IGF1R	1e-08	distant	0.00070028
2495881	2495904	chr2:99344317-99344488	EIF5B	9669	rs12437963	chr15:97314381	IGF1R	2e-08	distant	0.00253968
3899173	3899201	chr20:17548288-17548372	RRBP1	6238	rs2236250	chr20:17544730	RRBP1	1e-09	local	0.384183
3899173	3899201	chr20:17548288-17548372	RRBP1	6238	rs2236251	chr20:17545044	RRBP1	7e-09	local	0.293019
3899173	3899201	chr20:17548288-17548372	RRBP1	6238	rs911345	chr20:17545133	RRBP1	5e-09	local	0.29659
3887302	3887323	chr20:44190078-44190141	CD40	958	rs1887548	chr1:110097412	EPS8L3	8e-09	distant	0.0673966
3887302	3887323	chr20:44190078-44190141	CD40	958	rs281758	chr8:108700137		3e-08	distant	0.0262069
3887302	3887323	chr20:44190078-44190141	CD40	958	rs281756	chr8:108701521		3e-08	distant	0.0262069
3887302	3887323	chr20:44190078-44190141	CD40	958	rs281751	chr8:108705646		3e-08	distant	0.0262069
3891278	3891303	chr20:57000356-57000441	TH1L	51497	rs2271415	chr1:202699715	PIK3C2B	2e-08	distant	0.350288
3891278	3891303	chr20:57000356-57000441	TH1L	51497	rs7997410	chr13:112618178		1e-08	distant	0.0003125
3933999	3934000	chr21:43386221-43386259	U2AF1	7307	rs2270037	chr12:1620101	WNT5B	3e-08	distant	0.00368971
3933999	3934000	chr21:43386221-43386259	U2AF1	7307	rs927255	chr14:94012765	SERPINA9	2e-08	distant	0.023554
3933999	3934001	chr21:43386281-43386310	U2AF1	7307	rs2270037	chr12:1620101	WNT5B	1e-08	distant	0.00368971
3933999	3934001	chr21:43386281-43386310	U2AF1	7307	rs2270038	chr12:1620165	WNT5B	3e-08	distant	0.0049398
3935243	3935252	chr21:46435458-46435577	LSS	4047	rs7701234	chr5:115873149	SEMA6A	2e-08	distant	0.405522
3935243	3935252	chr21:46435458-46435577	LSS	4047	rs2222747	chr7:113630060		2e-08	distant	0.146546
3935243	3935252	chr21:46435458-46435577	LSS	4047	rs1830282	chr7:113630233		2e-08	distant	0.150677
3935243	3935252	chr21:46435458-46435577	LSS	4047	rs4730628	chr7:113631728		1e-08	distant	0.147709
3941907	3941919	chr22:28008424-28008470	EWSR1	2130	rs7206821	chr16:25202402		3e-08	distant	0.0229384
3941907	3941923	chr22:28012988-28013026	EWSR1	2130	rs6467599	chr7:134915441	NUP205	5e-09	distant	0.0450761
3941907	3941923	chr22:28012988-28013026	EWSR1	2130	rs11982788	chr7:144490055		3e-08	distant	0.0383523
3959451	3959461	chr22:35008705-35008777	MYH9	4627	rs9598929	chr13:64478247		3e-08	distant	0.110276
3959451	3959461	chr22:35008705-35008777	MYH9	4627	rs6772001	chr3:17096695	PLCL2	2e-10	distant	0.214172
3959451	3959463	chr22:35010093-35010118	MYH9	4627	rs6939486	chr6:23804422		3e-08	distant	0.0159313
3959631	3959764	chr22:35254511-35254590	EIF3S7	8664	rs9610529	chr22:35253817	EIF3D	1e-19	local	0.28
3959631	3959764	chr22:35254511-35254590	LOC646756	646756	rs9610529	chr22:35253817	EIF3D	1e-19	local	0.28
3959631	3959764	chr22:35254511-35254590	EIF3S7	8664	rs16996884	chr22:35254005	EIF3D	8e-21	local	0.255754
3959631	3959764	chr22:35254511-35254590	LOC646756	646756	rs16996884	chr22:35254005	EIF3D	8e-21	local	0.255754
3959631	3959764	chr22:35254511-35254590	EIF3S7	8664	rs6000302	chr22:35254119	EIF3D	8e-21	local	0.255754
3959631	3959764	chr22:35254511-35254590	LOC646756	646756	rs6000302	chr22:35254119	EIF3D	8e-21	local	0.255754
3959631	3959764	chr22:35254511-35254590	LOC646756	646756	rs5995296	chr22:35254184	EIF3D	8e-21	local	0.255754
3959631	3959764	chr22:35254511-35254590	EIF3S7	8664	rs5995296	chr22:35254184	EIF3D	8e-21	local	0.255754
3959631	3959764	chr22:35254511-35254590	LOC646756	646756	rs5995297	chr22:35254220	EIF3D	8e-21	local	0.255754
3959631	3959764	chr22:35254511-35254590	EIF3S7	8664	rs5995297	chr22:35254220	EIF3D	8e-21	local	0.255754
3959631	3959764	chr22:35254511-35254590	LOC646756	646756	rs6000303	chr22:35254272	EIF3D	8e-21	local	0.255754
3959631	3959764	chr22:35254511-35254590	EIF3S7	8664	rs6000303	chr22:35254272	EIF3D	8e-21	local	0.255754
3959631	3959764	chr22:35254511-35254590	EIF3S7	8664	rs5995298	chr22:35254659	EIF3D	8e-21	local	0.255754
3959631	3959764	chr22:35254511-35254590	LOC646756	646756	rs5995298	chr22:35254659	EIF3D	8e-21	local	0.255754
3959631	3959764	chr22:35254511-35254590	LOC646756	646756	rs5995299	chr22:35254721	EIF3D	8e-21	local	0.255754
3959631	3959764	chr22:35254511-35254590	EIF3S7	8664	rs5995299	chr22:35254721	EIF3D	8e-21	local	0.255754
3959631	3959764	chr22:35254511-35254590	LOC646756	646756	rs9610530	chr22:35256143		2e-19	local	0.268258
3959631	3959764	chr22:35254511-35254590	EIF3S7	8664	rs9610530	chr22:35256143		2e-19	local	0.268258
3959631	3959764	chr22:35254511-35254590	LOC646756	646756	rs9680657	chr22:35256872		1e-19	local	0.268258
3959631	3959764	chr22:35254511-35254590	EIF3S7	8664	rs9680657	chr22:35256872		1e-19	local	0.268258
3959631	3959764	chr22:35254511-35254590	EIF3S7	8664	rs6000305	chr22:35257365		4e-19	local	0.278961
3959631	3959764	chr22:35254511-35254590	LOC646756	646756	rs6000305	chr22:35257365		4e-19	local	0.278961
3959631	3959764	chr22:35254511-35254590	EIF3S7	8664	rs6000306	chr22:35257388		1e-19	local	0.268258
3959631	3959764	chr22:35254511-35254590	LOC646756	646756	rs6000306	chr22:35257388		1e-19	local	0.268258
3959631	3959764	chr22:35254511-35254590	EIF3S7	8664	rs10854690	chr22:35257838		1e-19	local	0.268258
3959631	3959764	chr22:35254511-35254590	LOC646756	646756	rs10854690	chr22:35257838		1e-19	local	0.268258
3959631	3959764	chr22:35254511-35254590	EIF3S7	8664	rs11089796	chr22:35257904		2e-19	local	0.268258
3959631	3959764	chr22:35254511-35254590	LOC646756	646756	rs11089796	chr22:35257904		2e-19	local	0.268258
3959631	3959764	chr22:35254511-35254590	LOC646756	646756	rs6000310	chr22:35258499		4e-19	local	0.258695
3959631	3959764	chr22:35254511-35254590	EIF3S7	8664	rs6000310	chr22:35258499		4e-19	local	0.258695
3959631	3959764	chr22:35254511-35254590	EIF3S7	8664	rs11956215	chr5:118688187	TNFAIP8	3e-08	distant	0.0520322
3959631	3959764	chr22:35254511-35254590	LOC646756	646756	rs11956215	chr5:118688187	TNFAIP8	3e-08	distant	0.0520322
3959631	3959764	chr22:35254511-35254590	LOC646756	646756	rs11956285	chr5:118688398	TNFAIP8	1e-08	distant	0.0402787
3959631	3959764	chr22:35254511-35254590	EIF3S7	8664	rs11956285	chr5:118688398	TNFAIP8	1e-08	distant	0.0402787
3959631	3959764	chr22:35254511-35254590	EIF3S7	8664	rs11959729	chr5:118688467	TNFAIP8	7e-09	distant	0.0301673
3959631	3959764	chr22:35254511-35254590	LOC646756	646756	rs11959729	chr5:118688467	TNFAIP8	7e-09	distant	0.0301673
3959631	3959764	chr22:35254511-35254590	EIF3S7	8664	rs6875361	chr5:118691877	TNFAIP8	2e-08	distant	0.0520322
3959631	3959764	chr22:35254511-35254590	LOC646756	646756	rs6875361	chr5:118691877	TNFAIP8	2e-08	distant	0.0520322
3959631	3959764	chr22:35254511-35254590	EIF3S7	8664	rs11950366	chr5:118692471	TNFAIP8	1e-08	distant	0.043969
3959631	3959764	chr22:35254511-35254590	LOC646756	646756	rs11950366	chr5:118692471	TNFAIP8	1e-08	distant	0.043969
3959631	3959764	chr22:35254511-35254590	LOC646756	646756	rs4392658	chr5:118693056	TNFAIP8	1e-08	distant	0.0462593
3959631	3959764	chr22:35254511-35254590	EIF3S7	8664	rs4392658	chr5:118693056	TNFAIP8	1e-08	distant	0.0462593
3959631	3959764	chr22:35254511-35254590	LOC646756	646756	rs1876737	chr5:118693319	TNFAIP8	1e-08	distant	0.0462593
3959631	3959764	chr22:35254511-35254590	EIF3S7	8664	rs1876737	chr5:118693319	TNFAIP8	1e-08	distant	0.0462593
3959631	3959764	chr22:35254511-35254590	EIF3S7	8664	rs11956042	chr5:118693699	TNFAIP8	1e-08	distant	0.0462593
3959631	3959764	chr22:35254511-35254590	LOC646756	646756	rs11956042	chr5:118693699	TNFAIP8	1e-08	distant	0.0462593
3959631	3959764	chr22:35254511-35254590	LOC646756	646756	rs7704026	chr5:118695151	TNFAIP8	1e-08	distant	0.0462593
3959631	3959764	chr22:35254511-35254590	EIF3S7	8664	rs7704026	chr5:118695151	TNFAIP8	1e-08	distant	0.0462593
3962145	3962146	chr22:40650997-40651224	TNFRSF13C	115650	rs1187627	chr14:94734481	CLMN	3e-08	distant	0.0192901
3962145	3962146	chr22:40650997-40651224	TNFRSF13C	115650	rs1187622	chr14:94735857	CLMN	3e-08	distant	0.0192901
3962145	3962146	chr22:40650997-40651224	TNFRSF13C	115650	rs1187621	chr14:94736012	CLMN	3e-08	distant	0.0192901
3962145	3962146	chr22:40650997-40651224	TNFRSF13C	115650	rs6002524	chr22:40618939	SREBF2	2e-10	local	0.0880117
3962145	3962146	chr22:40650997-40651224	TNFRSF13C	115650	rs5996080	chr22:40619411	SREBF2	2e-10	local	0.0880117
3962145	3962146	chr22:40650997-40651224	TNFRSF13C	115650	rs9620000	chr22:40626648	SREBF2	8e-10	local	0.0927872
3962145	3962146	chr22:40650997-40651224	TNFRSF13C	115650	rs6002527	chr22:40627913	SREBF2	8e-10	local	0.0927872
3962145	3962146	chr22:40650997-40651224	TNFRSF13C	115650	rs2229442	chr22:40631693	SREBF2	2e-10	local	0.0880117
3962145	3962146	chr22:40650997-40651224	TNFRSF13C	115650	rs5996088	chr22:40653858		7e-11	local	0.0833333
3962145	3962146	chr22:40650997-40651224	TNFRSF13C	115650	rs6002548	chr22:40666985	CENPM	1e-08	local	0.0462131
3962145	3962146	chr22:40650997-40651224	TNFRSF13C	115650	rs6002551	chr22:40668097	CENPM	1e-09	local	0.128196
3962145	3962146	chr22:40650997-40651224	TNFRSF13C	115650	rs6002554	chr22:40669040	CENPM	4e-09	local	0.0427475
3962145	3962146	chr22:40650997-40651224	TNFRSF13C	115650	rs1023497	chr22:40670453	CENPM	4e-09	local	0.0361742
3962145	3962146	chr22:40650997-40651224	TNFRSF13C	115650	rs1023498	chr22:40670514	CENPM	5e-09	local	0.0347671
3962145	3962146	chr22:40650997-40651224	TNFRSF13C	115650	rs1023499	chr22:40670527	CENPM	4e-09	local	0.0427475
3962145	3962146	chr22:40650997-40651224	TNFRSF13C	115650	rs7293091	chr22:40671253	CENPM	9e-09	local	0.0386187
3962494	3962500	chr22:41311073-41311139	POLDIP3	84271	rs136989	chr22:41276823		7e-09	local	0.0821595
3962494	3962500	chr22:41311073-41311139	POLDIP3	84271	rs137055	chr22:41299975	SERHL2	6e-16	local	0.300687
3962494	3962500	chr22:41311073-41311139	POLDIP3	84271	rs137074	chr22:41303645		7e-22	local	0.304592
3962494	3962500	chr22:41311073-41311139	POLDIP3	84271	rs137085	chr22:41311081	POLDIP3	4e-32	local	0.166748
3962494	3962500	chr22:41311073-41311139	POLDIP3	84271	rs137086	chr22:41311110	POLDIP3	7e-27	local	0.111607
3962494	3962500	chr22:41311073-41311139	POLDIP3	84271	rs137088	chr22:41311833	POLDIP3	3e-08	local	0.142429
3962494	3962500	chr22:41311073-41311139	POLDIP3	84271	rs137111	chr22:41338047	POLDIP3	1e-09	local	0.0891675
3962494	3962500	chr22:41311073-41311139	POLDIP3	84271	rs137122	chr22:41343779	CYB5R3	1e-09	local	0.277453
3962494	3962500	chr22:41311073-41311139	POLDIP3	84271	rs137124	chr22:41345659	CYB5R3	6e-10	local	0.575429
3965393	3965401	chr22:48683352-48683456	ALG12	79087	rs7999743	chr13:22499732		2e-08	distant	0.0138627
[truncated: 814 more rows]

## Sheet: Supplemental Table S1
Supplemental Table S1. Differentially spliced probesets between the CEU and YRI samples.
Affymetrix TC ID	Affymetrix PS ID	Gene Symbol	Entrez ID	Cytoband	One-sided Permuted P (CEU < YRI)	One-sided Permuted P (YRI < CEU)	SI Mean (CEU)	SI Mean (YRI)	PIR Annotation	OMIM Disease	PS Overlaps CDS
3051868	3051874	PSPH	5723	7p15.2-p15.1	0	1	-0.00226198	0.101481		Phosphoserine phosphatase deficiency,	TRUE
2391360	2391405	CPSF3L	54973	1p36.33	0	1	-0.14929	-0.0319026			TRUE
2423264	2423272	TMED5	50999	1pter-q31.3	0	1	0.0923967	0.208859			TRUE
3126087	3126102	ASAH1	427	8p22-p21.3	0	1	-0.0358265	0.078529		Farber lipogranulomatosis,	TRUE
3051868	3051880	PSPH	5723	7p15.2-p15.1	0	1	0.148757	0.207533		Phosphoserine phosphatase deficiency,	TRUE
3812426	3812475	RTTN	25914	18q22.2	0	1	-0.102231	0.07978			TRUE
3236958	3237001	VIM	7431	10p13	0	1	-0.0440225	0.0116579			FALSE
2404521	2404524	PEF1	553115	1p34	0	1	0.0824725	0.152602			TRUE
2396537	2396584	FRAP1	2475	1p36.2	0	1	-0.192267	-0.0659639			TRUE
3899173	3899201	RRBP1	6238	20p12	0	1	0.00783085	0.0546635	Alternative Products		TRUE
3333711	3333716	SLC3A2	6520	11q13	0	1	-0.362418	-0.227869			FALSE
3970833	3970894	PDHA1	5160	Xp22.2-p22.1	0	1	-0.0868549	-0.0391908		Leigh syndrome, X-linked, Pyruvate dehydrogenase deficiency, pyruvate decarboxylase deficiency,	FALSE
2584207	2584215	IFIH1	64135	2q24	0	1	-0.0185557	0.0327133	Alternative Products	Diabetes mellitus, insulin-dependent, susceptibility to,	TRUE
4009315	4009381	HUWE1	10075	Xp11.22	0	1	0.0830217	0.0991936	Alternative Products		TRUE
3704896	3704899	CHMP1A	5119	16q24.3	0	1	0.0583854	0.139151	Alternative Products		FALSE
2367743	2367757	PRDX6	9588	1q25.1	0	1	-0.155798	-0.112479			TRUE
3715703	3715716	SUPT6H	6830	17q11.2	0	1	-0.0835636	-0.0471047	Alternative Products		TRUE
2532021	2532046	PTMA	5757	2q35-q36	0	1	0.572649	0.627731	Alternative Products		TRUE
3715703	3715717	SUPT6H	6830	17q11.2	0	1	0.0550941	0.078548	Alternative Products		TRUE
3017080	3017096	ARMC10	83787	7q22.1	0	1	0.0441864	0.113009			FALSE
3642815	3642832	NME4	4833	16p13.3	0	1	-0.148012	-0.087119			FALSE
2495881	2495905	EIF5B	9669	2q11.2	0	1	-0.075844	-0.0155217			TRUE
3865119	3865120	ZNF342	162979	19q13.32	0	1	-0.0224395	0.0289279			FALSE
3301218	3301223	PDLIM1	9124	10q22-q26.3	0	1	-0.430786	-0.290171			FALSE
3875108	3875130	C20orf196	149840	20p12.3	0	1	0.228787	0.288874			FALSE
2440327	2440329	SLAMF1	6504	1q22-q23	0	1	-0.179932	-0.0287344	Alternative Products		FALSE
3848492	3848512	FCER2	2208	19p13.3	0	1	0.106495	0.126548	Alternative Products		TRUE
2565262	2565329	ASCC3L1	23020	2q11.2	0	1	0.0473707	0.0662646	Alternative Products		TRUE
3742627	3742635	C17orf87	388325	17p13.2	0	1	-0.114395	0.0214318			TRUE
3503224	3503253	UPF3A	65110	13q34	0	1	-0.137851	-0.0807446	Alternative Products		FALSE
2888519	2888521	UIMC1	51720	5q35.2	0	1	0.0480238	0.0765203			FALSE
3204744	3204821	TLN1	7094	9p13	0	1	0.0674123	0.0948198			TRUE
4026956	4026994	HCFC1	3054	Xq28	0	1	0.0817436	0.106423	Alternative Products		TRUE
3818515	3818518	TRIP10	9322	19p13.3	0	1	0.0372516	0.0652189	Alternative Products		TRUE
2532021	2532044	PTMA	5757	2q35-q36	0	1	0.541691	0.597426	Alternative Products		TRUE
2532021	2532049	PTMA	5757	2q35-q36	0	1	0.531107	0.579505	Alternative Products		TRUE
3333358	3333392	INCENP	3619	11q12-q13	0	1	-0.0808161	-0.0321946			FALSE
2541230	2541373	NAG	51594	2p24	0	1	-0.0552752	0.0519518			TRUE
2950214	2950215	TAP1	6890	6p21.3	0	1	-0.0368447	-0.00402916		Bare lymphocyte syndrome, type I,	FALSE
3871256	3871258	SAPS1	22870	19q13.42	0	1	-0.13005	-0.0932596			FALSE
2706791	2706797	ZMAT3	64393	3q26.3-q27	0	1	-0.094405	-0.0444177			FALSE
2865050	2865073	RPS23	6228	5q14.2	0	1	0.350674	0.402583			TRUE
3398482	3398485	SNX19	399979	11q25	0	1	0.0250094	0.0596272			FALSE
3014714	3014739	ARPC1B	10095	7q22.1	0	1	0.0752062	0.092337			FALSE
2863964	2864000	ARSB	411	5q11-q13	0	1	0.0845795	0.135825		Maroteaux-Lamy syndrome, several forms,	TRUE
3204744	3204819	TLN1	7094	9p13	0	1	0.0853425	0.111233			TRUE
3476012	3476020	MPHOSPH9	10198	12q24.31	0	1	-0.1333	-0.0654997	Alternative Products		TRUE
3662387	3662411	HERPUD1	9709	16q12.2-q13	0	1	-0.0278851	-0.0039134			FALSE
4026956	4026996	HCFC1	3054	Xq28	0	1	0.0914879	0.115141	Alternative Products		TRUE
2899340	2899343	BTN2A2	10385	6p22.1	0	1	-0.0232153	0.0210572	Alternative Products		FALSE
3503224	3503228	UPF3A	65110	13q34	0	1	-0.12275	-0.0677599	Alternative Products		TRUE
3339261	3339279	IL18BP	10068	11q13	0	1	0.153135	0.192948	Alternative Products		FALSE
3766651	3766657	ERN1	2081	17q24.2	0	1	0.00961325	0.0784049			TRUE
2845973	2845981	LPCAT1	79888	5p15.33	0	1	-0.114323	-0.0628952			FALSE
3685610	3685612	ARHGAP17	55114	16p12.1	0	1	0.22702	0.256386			TRUE
3643229	3643238	RHOT2	89941	16p13.3	0	1	0.174935	0.199644			TRUE
2865050	2865068	RPS23	6228	5q14.2	0	1	0.388294	0.44405			TRUE
3766284	3766324	LYK5	92335	17q23.3	0	1	0.15253	0.182385		Polyhydramnios, megalencephaly, and symptomatic epilepsy,	TRUE
3725035	3725040	NFE2L1	4779	17q21.3	0	1	-0.12182	-0.083988	Alternative Products		FALSE
3695699	3695700	ATP6V0D1	9114	16q22	0	1	0.000176454	0.0244226			FALSE
2399409	2399591	UBR4	23352	1p36.13	0	1	0.115801	0.145159			TRUE
2844410	2844439	MAML1	9794	5q35	0	1	-0.0284108	0.0387913			FALSE
2406064	2406083	SFPQ	6421	1p34.3	0	1	-0.00761628	0.0169388	Alternative Products		TRUE
3157660	3157677	TSTA3	7264	8q24.3	0	1	0.0249484	0.0469112			TRUE
3227159	3227161	FNBP1	23048	9q34	0	1	0.137739	0.152623			FALSE
3735847	3735930	SEPT9	10801	17q25	0	1	0.136909	0.182274	Alternative Products	Amyotrophy, hereditary neuralgic, Leukemia, acute myeloid, therapy-related, Ovarian carcinoma, neuritis with brachial predilection,	FALSE
3851545	3851576	MAN2B1	4125	19cen-q13.1	0	1	0.0269163	0.0491657		Mannosidosis, alpha-, types I and II,	TRUE
3348852	3348885	DLAT	1737	11q23.1	0	1	0.0034708	0.0296104			FALSE
2532021	2532024	PTMA	5757	2q35-q36	0	1	0.544954	0.595302	Alternative Products		TRUE
3015216	3015219	COPS6	10980	7q22.1	0	1	0.024113	0.0434998			TRUE
2927722	2927732	HEBP2	23593	6q24	0	1	0.164665	0.293869			FALSE
3760137	3760140	KIAA1267	284058	17q21.31	0	1	0.0393227	0.068548			FALSE
3832777	3832780	MRPS12	6183	19q13.1-q13.2	0	1	-0.0307713	0.0216243			FALSE
3996289	3996305	EMD	2010	Xq28	0	1	-0.0983672	-0.0442476		Emery-Dreifuss muscular dystrophy,	FALSE
3832643	3832645	ACTN4	81	19q13	0	1	-0.15359	-0.127377		Glomerulosclerosis, focal segmental, 1,	TRUE
3994915	3994946	HMGB3	3149	Xq28	0	1	0.219847	0.264037			FALSE
2902559	2902572	CSNK2B	1460	6p21-p12|6p21.3	0	1	-0.194551	-0.102798			FALSE
3179646	3179650	SUSD3	203328	9q22.31	0	1	-0.125749	-0.0605267			FALSE
3506153	3506168	MTMR6	9107	13q12	0	1	-0.0773441	0.023285			TRUE
3670918	3671050	PLCG2	5336	16q24.1	0	1	-0.0796945	-0.0511381			FALSE
3327948	3328002	TTC17	55761	11p12-p11.2	0	1	-0.0206893	0.0289367			FALSE
3996467	3996481	PLXNA3	55558	Xq28	0	1	-0.0408401	0.0223188			TRUE
2631845	2631872	CHMP2B	25978	3p11.2	0	1	0.0363416	0.0726595		Amyotrophic lateral sclerosis, CHMP2B-related, Dementia, familial, nonspecific,	FALSE
3933999	3934000	U2AF1	7307	21q22.3	0	1	0.1219	0.198646			FALSE
3833040	3833056	SUPT5H	6829	19q13	0	1	0.0622406	0.0870012	Alternative Products		TRUE
2639054	2639118	PARP14	54625	3q21.1	0	1	-0.199861	-0.160554			FALSE
3934669	3934671	SUMO3	6612	21q22.3	0	1	0.0686489	0.0995075			FALSE
3740479	3740522	PRPF8	10594	17p13.3	0	1	0.0532729	0.0663396		Retinitis pigmentosa-13,	TRUE
2881370	2881391	CD74	972	5q32	0	1	0.0843769	0.0936752	Alternative Products		TRUE
2454532	2454583	INTS7	25896	1p36.13-q42.3	0	1	-0.0544342	-0.01051			FALSE
3510362	3510365	C13orf23	80209	13q13.3	0	1	0.0458539	0.0783466			TRUE
2950629	2950634	TAPBP	6892	6p21.3	0	1	-0.303961	-0.219929	Alternative Products	Bare lymphocyte syndrome, type I,	TRUE
2625907	2625993	FLNB	2317	3p14.3	0	1	0.161366	0.187406	Alternative Products	Atelosteogenesis, type III, Atelostogenesis, type I, Boomerang dysplasia, Larsen syndrome, autosomal dominant, Larson syndrome, Spondylocarpotarsal synostosis syndrome,	TRUE
3959631	3959722	EIF3D	8664	22q13.1	0	1	-0.430554	-0.351301			FALSE
2588127	2588134	ATP5G3	518	2q31.1	0	1	0.101422	0.126605			TRUE
3236786	3236819	PTER	9317	10p12	0	1	-0.147168	-0.00738318			FALSE
3432438	3432462	OAS1	4938	12q24.1	0	1	-0.173275	-0.0831053	Alternative Products	Diabetes mellitus, type 1, susceptibility to, Viral infection, susceptibility to,	TRUE
3261643	3261659	NFKB2	4791	10q24	0	1	0.171498	0.191876	Alternative Products		TRUE
3887302	3887322	CD40	958	20q12-q13.2	0	1	-0.157147	-0.0961551	Alternative Products	Immunodeficiency with hyper-IgM, type 3,	TRUE
3845365	3845370	TCF3	6929	19p13.3	0	1	0.0608867	0.0967819	Alternative Products	Leukemia, acute lymphoblastic,	FALSE
3575103	3575125	GALC	2581	14q31	0	1	0.0505856	0.13625	Alternative Products	Krabbe disease,	TRUE
2844203	2844343	CANX	821	5q35	0	1	-0.443514	-0.39322			FALSE
3458451	3458455	R3HDM2	22864	12q13.3	0	1	-0.0154052	0.0170905			FALSE
3190558	3190571	SPTAN1	6709	9q33-q34	0	1	0.0125912	0.0314719	Alternative Products		TRUE
3645253	3645313	SRRM2	23524	16p13.3	0	1	-0.234059	-0.178551			FALSE
3581515	3581545	BRF1	2972	14q	0	1	0.17109	0.197867	Alternative Products		TRUE
2891341	2891371	IRF4	3662	6p25-p23	0	1	0.0970676	0.108345	Alternative Products	Multiple myeloma,	FALSE
2434746	2434769	FAM63A	55793	1q21.2	0	1	0.0447487	0.0892967			FALSE
2565262	2565328	ASCC3L1	23020	2q11.2	0	1	0.022185	0.0446353	Alternative Products		TRUE
2865050	2865065	RPS23	6228	5q14.2	0	1	0.351564	0.403702			TRUE
2830742	2830750	JMJD1B	51780	5q31	0	1	0.0122389	0.03576			TRUE
3569754	3569757	ZFP36L1	677	14q22-q24	0	1	0.0536151	0.074522			TRUE
3770743	3770754	GRB2	2885	17q24-q25	0	1	-0.0265991	-0.00769566	Alternative Products		FALSE
3221916	3221949	AKNA	80709	9q32	0	1	-0.0773155	-0.000299546			TRUE
3302360	3302399	MMS19	64210	10q24-q25	0	1	0.0865847	0.106142	Alternative Products		TRUE
3159946	3160044	SMARCA2	6595	9p22.3	0	1	0.0430697	0.0652092	Alternative Products		TRUE
3793760	3793820	CNDP2	55748	18q22.3	0	1	-0.0334695	0.00432934			FALSE
3529857	3529871	C14orf21	161424	14q12	0	1	0.0591691	0.0861188			TRUE
3845909	3845915	LMNB2	84823	19p13.3	0	1	0.0182675	0.0359971		Lipodystrophy, partial, acquired,	TRUE
3261820	3261848	TRIM8	81603	10q24.3	0	1	0.189701	0.214138			FALSE
3337196	3337209	NDUFV1	4723	11q13	0	1	0.0502629	0.0638869		Alexander disease, Leigh syndrome, Mitochondrial complex I deficiency,	TRUE
3261643	3261658	NFKB2	4791	10q24	0	1	0.112636	0.129201	Alternative Products		TRUE
3831168	3831177	CAPNS1	826	19q13.12	0	1	-0.0571791	-0.038945			TRUE
2927722	2927733	HEBP2	23593	6q24	0	1	0.0750932	0.188848			TRUE
3217487	3217514	ALG2	85365	9q22.33	0	1	0.0171635	0.042256	Alternative Products	Congenital disorder of glycosylation, type Ii,	FALSE
2717593	2717660	SH3TC1	54436	4p16.1	0	1	-0.0187963	0.0336637			FALSE
3747199	3747200	PRR6	201161	17p11.2	0	1	0.215775	0.250993			FALSE
3816112	3816139	SCAMP4	113178	19p13.3	0	1	-0.137788	-0.0707714	Alternative Products		TRUE
3733590	3733610	SOX9	6662	17q24.3-q25.1	0	1	0.357354	0.386115		Acampomelic campomelic dysplasia, Campomelic dysplasia, Campomelic dysplasia with autosomal sex reversal,	FALSE
2419235	2419295	FUBP1	8880	1p31.1	0	1	-0.20707	-0.156161	Alternative Products		TRUE
3673723	3673738	TRAPPC2L	51693	16q24.3	0	1	-0.16288	-0.114216			FALSE
3957260	3957263	SF3A1	10291	22q12.2	0	1	0.16538	0.184716			FALSE
2328465	2328585	KHDRBS1	10657	1p32	0	1	-0.398807	-0.331459			FALSE
3692895	3692899	NUDT21	11051	16q13	0	1	-0.0564238	-0.0372195			FALSE
3996404	3996416	GDI1	2664	Xq28	0	1	-0.0150069	-0.00193791		Mental retardation, X-linked nonspecific,	TRUE
3654227	3654229	IL21R	50615	16p11	0	1	-0.131923	-0.100628		IgE, elevated level of, Lymphoma, diffuse large B-cell,	FALSE
2532021	2532039	PTMA	5757	2q35-q36	0	1	0.409547	0.455853	Alternative Products		TRUE
3340589	3340610	SERPINH1	871	11q13.5	0	1	0.106401	0.147993		Preterm premature rupture of the membranes, susceptibility to,	FALSE
3601840	3601877	CSK	1445	15q23-q25	0	1	-0.00463617	0.0232999			TRUE
3453370	3453382	ARF3	377	12q13	0	1	0.0475146	0.070321			FALSE
2950629	2950637	TAPBP	6892	6p21.3	0	1	-0.40149	-0.348273	Alternative Products	Bare lymphocyte syndrome, type I,	TRUE
3936442	3936469	PEX26	55670	22q11.21	0	1	0.0419343	0.0802081		Adrenoleukodystrophy, neonatal, Refsum disease, infantile form, Zellweger syndrome,	FALSE
2802398	2802658	TRIO	7204	5p15.1-p14	0	1	-0.109121	-0.0454107	Alternative Products		TRUE
2865050	2865064	RPS23	6228	5q14.2	0	1	0.206305	0.261791			TRUE
3759077	3759078	SLC25A39	51629	17q12	0	1	0.0049803	0.035707			FALSE
3474372	3474375	PXN	5829	12q24.31	0	1	0.110599	0.153293	Alternative Products		FALSE
3140213	3140231	MSC	9242	8q21	0	1	0.0326725	0.049083			FALSE
3634071	3634080	TSPAN3	10099	15q24.3	0	1	-0.216109	-0.0880791			TRUE
3587015	3587048	KLF13	51621	15q12	0	1	0.0182094	0.0416275			FALSE
3707431	3707473	KIF1C	10749	17p13.2	0	1	-0.0795501	-0.0335763			FALSE
2495881	2495904	EIF5B	9669	2q11.2	0	1	-0.0420017	0.0146401			TRUE
3836841	3836869	CALM3	808	19q13.2-q13.3	0	1	-0.137539	-0.110095			FALSE
4027416	4027419	G6PD	2539	Xq28	0	1	-0.242445	-0.177259	Alternative Products	Favism, G6PD deficiency, Hemolytic anemia due to G6PD deficiency,	FALSE
3031383	3031396	REPIN1	29803	7q36.1	0	1	0.0531502	0.0840603			FALSE
3846742	3846775	SH3GL1	6455	19p13.3	0	1	0.238111	0.268531		Leukemia, acute myeloid,	TRUE
3503224	3503252	UPF3A	65110	13q34	0	1	-0.0620856	-0.0215486	Alternative Products		TRUE
3159946	3160062	SMARCA2	6595	9p22.3	0	1	-0.0476492	-0.0168395	Alternative Products		TRUE
3865715	3865756	SYMPK	8189	19q13.3	0	1	0.148893	0.164316	Alternative Products		TRUE
3947123	3947198	SREBF2	6721	22q13	0	1	-0.11622	-0.0847021			FALSE
2437273	2437275	C1orf2	10712	1q21	0	1	0.0533273	0.0879556			TRUE
2676092	2676124	BAP1	8314	3p21.31-p21.2	0	1	-0.0317695	0.00322353			TRUE
3973839	3973841	CYBB	1536	Xp21.1	0	1	-0.0837935	-0.0634279		Chronic granulomatous disease, X-linked,	TRUE
3569754	3569758	ZFP36L1	677	14q22-q24	0	1	0.0182328	0.0382576			TRUE
3933999	3934001	U2AF1	7307	21q22.3	0	1	-0.0353069	0.0486373			TRUE
2436938	2436943	PBXIP1	57326	1q21.3	0	1	0.0996366	0.137118			FALSE
3667902	3667909	DHX38	9785	16q21-q22.3	0	1	0.0656626	0.0973379			TRUE
3865715	3865759	SYMPK	8189	19q13.3	0.0001	1	0.150967	0.168788	Alternative Products		TRUE
2908474	2908510	HSP90AB1	3326	6p12	0.0001	1	-0.465959	-0.412659			TRUE
3015216	3015221	COPS6	10980	7q22.1	0.0001	1	-0.00793239	0.0116387			TRUE
3744800	3744805	STX8	9482	17p12	0.0001	1	-0.0152429	0.0629969			FALSE
3558071	3558074	RABGGTA	5875	14q11.2	0.0001	1	0.0585601	0.0861646			TRUE
3379326	3379327	CHKA	1119	11q13.2	0.0001	1	-0.0499936	-0.00690196	Alternative Products		FALSE
3303652	3303658	MRPL43	84545	10q24.31	0.0001	1	-0.0180766	0.0607618	Alternative Products		TRUE
2390489	2390507	ZNF672	79894	1q44	0.0001	1	0.126386	0.152707			TRUE
3503224	3503247	UPF3A	65110	13q34	0.0001	1	-0.263767	-0.196918	Alternative Products		TRUE
3795184	3795270	NFATC1	4772	18q23	0.0001	1	0.00823145	0.0560397			FALSE
2393711	2393715	LRRC47	57470	1p36.32	0.0001	1	0.133367	0.154514			TRUE
3865715	3865760	SYMPK	8189	19q13.3	0.0001	1	-0.0569441	-0.0291449	Alternative Products		TRUE
2400220	2400221	DDOST	1650	1p36.1	0.0001	1	-0.0474152	-0.0248303			FALSE
3403539	3403564	FOXJ2	55810	12p13.31	0.0001	1	0.129576	0.162293	Alternative Products		FALSE
3709244	3709268	CHD3	1107	17p13.1	0.0001	1	0.14859	0.167424	Alternative Products		TRUE
3159946	3160042	SMARCA2	6595	9p22.3	0.0001	1	0.0899271	0.109079	Alternative Products		TRUE
3738969	3739040	FOXK2	3607	17q25	0.0001	1	0.0469153	0.0661088	Alternative Products		FALSE
3802129	3802168	SS18	6760	18q11.2	0.0001	1	-0.0185903	0.00992523	Alternative Products	Sarcoma, synovial,	FALSE
2865050	2865071	RPS23	6228	5q14.2	0.0001	1	0.164524	0.214004			TRUE
3556556	3556745	DAD1	1603	14q11-q12	0.0002	1	-0.558341	-0.503573		Temperature-sensitive apoptosis, cellular,	FALSE
3240340	3240423	WAC	51322	---	0.0002	1	0.127593	0.146088			FALSE
4026956	4026995	HCFC1	3054	Xq28	0.0002	1	-0.0139714	0.0120693	Alternative Products		TRUE
3853453	3853455	FLJ21438	64926	19p13.12	0.0003	1	-0.116388	-0.0849951			FALSE
3203753	3203817	UBAP2	55833	9p13.3	0.0003	1	0.146811	0.166201			TRUE
3887302	3887323	CD40	958	20q12-q13.2	0.0003	1	-0.0436534	0.00658926	Alternative Products	Immunodeficiency with hyper-IgM, type 3,	FALSE
3297536	3297540	ANXA11	311	10q23	0.0005	1	0.0698591	0.0864648			FALSE
2347096	2347109	DR1	1810	1p22.1	0.0005	1	-0.157306	-0.0966608			FALSE
2436283	2436284	DENND4B	9909	1q21	0.0005	1	0.0516908	0.078666			FALSE
3528895	3528913	LRP10	26020	14q11.2	0.0005	1	-0.0324712	0.00902229	Alternative Products		TRUE
2888341	2888345	RNF44	22838	5q35.2	0.0006	1	0.00272013	0.0516596			FALSE
3471005	3471006	GIT2	9815	12q24.1	0.0006	1	0.0610872	0.0942049	Alternative Products		FALSE
3851545	3851575	MAN2B1	4125	19cen-q13.1	0.0006	1	0.176445	0.196877		Mannosidosis, alpha-, types I and II,	TRUE
3284073	3284084	EPC1	80314	10p11	0.0006	1	0.101611	0.134431	Alternative Products		FALSE
2779897	2779932	MANBA	4126	4q22-q25	0.0006	1	-0.0326117	0.0831314		Mannosidosis, beta,	TRUE
3502570	3502594	LAMP1	3916	13q34	0.0006	1	0.0467501	0.076198			FALSE
3766533	3766534	CD79B	974	17q23	0.0008	1	-0.132483	-0.0960885	Alternative Products		FALSE
3503224	3503236	UPF3A	65110	13q34	0.0008	1	-0.103324	-0.0571807	Alternative Products		TRUE
3823625	3823660	AP1M1	8907	19p13.12	0.0008	1	-0.0836179	-0.048369			FALSE
3359529	3359546	CARS	833	11p15.5	0.0008	1	0.0333316	0.083272			TRUE
3561039	3561044	NFKBIA	4792	14q13	0.0008	1	0.0242685	0.03153		Ectodermal dysplasia, anhidrotic, with T-cell immunodeficiency,	TRUE
2515050	2515096	GORASP2	26003	2q31.1-q31.2	0.0008	1	-0.188394	-0.136793	Alternative Products		FALSE
3851545	3851577	MAN2B1	4125	19cen-q13.1	0.0008	1	0.163365	0.176243		Mannosidosis, alpha-, types I and II,	TRUE
2393654	2393671	KIAA0495	57212	1p36.32	0.0008	1	0.308923	0.354423			FALSE
3722554	3722568	DHX8	1659	17q21.31	0.0008	1	0.0632406	0.0836			TRUE
3708462	3708473	CENTB1	9744	17p13.1	0.0008	1	-0.0259731	-0.000817179			TRUE
3727712	3727735	PCTP	58488	17q21-q24	0.0008	1	-0.0307362	0.018183			FALSE
3275132	3275534	GDI2	2665	10p15	0.0008	1	-0.223751	-0.170714			FALSE
3458337	3458371	STAT6	6778	12q13	0.0008	1	0.00227153	0.0203446			TRUE
3230811	3230813	DPP7	29952	9q34.3	0.0008	1	-0.140489	-0.092066			FALSE
2540317	2540345	PDIA6	10130	2p25.1	0.0008	1	-0.0650481	-0.051714	Alternative Products		TRUE
3320301	3320361	CTR9	9646	11p15.3	0.0008	1	-0.103586	-0.0603179			TRUE
2877141	2877146	HNRNPA0	10949	5q31	0.0009	1	-0.0505436	-0.0174772			FALSE
2496628	2496653	C2orf29	55571	2q11.2	0.0009	1	-0.0185896	0.00442536			FALSE
2494537	2494578	ARID5A	10865	2q11.2	0.0009	1	-0.0454967	0.00738113			FALSE
3817380	3817390	EBI3	10148	19p13.3	0.0013	1	0.0164533	0.0350038			FALSE
2803329	2803376	BASP1	10409	5p15.1-p14	0.0013	1	0.118518	0.13937			FALSE
2540317	2540337	PDIA6	10130	2p25.1	0.0013	1	-0.0569052	-0.0300173	Alternative Products		TRUE
2949148	2949188	BAT3	7917	6p21.3	0.0013	1	0.134489	0.145777	Alternative Products		TRUE
2851965	2852054	RNASEN	29102	5p13.3	0.0013	1	0.0471326	0.0774031	Alternative Products		TRUE
3654227	3654254	IL21R	50615	16p11	0.0014	1	0.155569	0.178117		IgE, elevated level of, Lymphoma, diffuse large B-cell,	FALSE
3774635	3774650	FASN	2194	17q25	0.0014	1	0.119357	0.136121			TRUE
4026956	4026957	HCFC1	3054	Xq28	0.0014	1	0.204613	0.221346	Alternative Products		FALSE
4007774	4007777	WDR45	11152	Xp11.23	0.0014	1	0.0268879	0.0681646	Alternative Products		FALSE
2999485	2999508	STK17A	9263	7p12-p14	0.0016	1	-0.0165106	0.00985428			FALSE
3157901	3157963	PLEC1	5339	8q24	0.0016	1	-0.0018919	0.0382152	Alternative Products	Epidermolysis bullosa simplex, Ogna type, Muscular dystrophy with epidermolysis bullosa simplex,	TRUE
2391647	2391654	SSU72	29101	1p36.33	0.0016	1	0.00087001	0.0213072			TRUE
3886704	3886718	STK4	6789	20q11.2-q13.2	0.0016	1	0.00951747	0.0216166	Alternative Products		TRUE
2393654	2393673	KIAA0495	57212	1p36.32	0.0016	1	0.171377	0.222946			FALSE
3841076	3841096	MYADM	91663	19q13.41	0.0016	1	0.00329815	0.0725172			FALSE
3693511	3693515	C16orf80	29105	16q21	0.0017	1	0.0425502	0.0650174			FALSE
2967321	2967377	PREP	5550	6q22	0.0017	1	0.111616	0.135856			TRUE
3823901	3823908	SIN3B	23309	19p13.11	0.0017	1	0.0761863	0.0992309	Alternative Products		TRUE
3190558	3190569	SPTAN1	6709	9q33-q34	0.0017	1	0.0487713	0.0644604	Alternative Products		TRUE
3320301	3320349	CTR9	9646	11p15.3	0.0017	1	0.0566956	0.0808667			TRUE
2663810	2663852	XPC	7508	3p25	0.0018	1	0.0740404	0.104189		Xeroderma pigmentosum, group C,	TRUE
3707642	3707691	RABEP1	9135	17p13.2	0.0018	1	-0.0419253	-0.00612816	Alternative Products		FALSE
2830742	2830753	JMJD1B	51780	5q31	0.0018	1	-0.163619	-0.132796			TRUE
3676669	3676670	RNPS1	10921	16p13.3	0.0018	1	0.0341153	0.0731848	Alternative Products		FALSE
2398073	2398103	FBXO42	54455	1p36.23-p36.11	0.0018	1	0.0244108	0.079113			TRUE
3557268	3557282	HOMEZ	57594	14q11.2	0.0018	1	-0.00925767	0.0263686			TRUE
2657981	2658013	CCDC50	152137	3q28	0.0018	1	-0.00847643	0.0149467		Deafness, autosomal dominant 44,	FALSE
2336271	2336295	BTF3L4	91408	1p32.3	0.0018	1	-0.0841865	-0.0628254			FALSE
3956290	3956330	PITPNB	23760	22q12.1	0.0018	1	-0.0161669	0.00261117	Alternative Products		TRUE
3678395	3678442	N-PAC	84656	16p13.3	0.0018	1	-0.0433108	-0.0142146			TRUE
3895722	3895730	CENPB	1059	20p13	0.0018	1	0.141439	0.175103			TRUE
2319560	2319652	UBE4B	10277	1p36.3	0.0019	1	0.088406	0.111967	Alternative Products		FALSE
2536183	2536193	PPP1R7	5510	2q37.3	0.0019	1	-0.0388549	-0.0101315			TRUE
2773023	2773109	ANKRD17	26057	4q13.3	0.002	1	-0.0139247	0.0123828			TRUE
3976341	3976359	TIMP1	7076	Xp11.3-p11.23	0.002	1	-0.0249169	-0.00642258			FALSE
2322103	2322126	SPEN	23013	1p36.33-p36.11	0.002	1	0.130644	0.149614			TRUE
3834089	3834142	HNRPUL1	11100	19q13.2	0.002	1	-0.390169	-0.340394			FALSE
3833040	3833051	SUPT5H	6829	19q13	0.002	1	-0.191365	-0.136608	Alternative Products		TRUE
3533435	3533453	PNN	5411	14q21.1	0.002	1	0.00789142	0.0675931	Alternative Products		TRUE
3368707	3368723	CD59	966	11p13	0.002	1	-0.0943034	-0.0618388		CD59 deficiency,	FALSE
3415915	3415936	PFDN5	5204	12q12	0.002	1	-0.099396	-0.0681559			FALSE
3026988	3027034	LUC7L2	51631	7q34	0.002	1	-0.0410657	-0.0086904	Alternative Products		FALSE
3290210	3290220	ZWINT	11130	10q21-q22	0.002	1	-0.153543	-0.0961348			FALSE
3089360	3089375	SLC39A14	23516	8p21.3	0.002	1	-0.192288	-0.133575			TRUE
2591942	2591944	ORMDL1	94101	2q32	0.002	1	-0.17399	-0.114286			FALSE
3476012	3476026	MPHOSPH9	10198	12q24.31	0.002	1	0.0766428	0.11067	Alternative Products		TRUE
2738146	2738172	KIAA1546	54790	4q24	0.002	1	-0.0739732	-0.0296147			FALSE
3704376	3704393	FAM38A	9780	16q24.3	0.002	1	0.0700918	0.0986926			TRUE
3855410	3855454	SFRS14	10147	19p12	0.002	1	-0.0243383	0.00788429	Alternative Products		TRUE
3795184	3795269	NFATC1	4772	18q23	0.002	1	0.13413	0.164538			FALSE
3847252	3847290	SAFB2	9667	19p13.3	0.002	1	0.0570418	0.100983			TRUE
2590736	2590750	NCKAP1	10787	2q32	0.002	1	0.138377	0.190354			FALSE
2922215	2922229	MARCKS	4082	6q22.2	0.002	1	0.0520302	0.0710205			FALSE
3899346	3899351	SNX5	27131	20p11	0.002	1	0.023827	0.0682585			FALSE
2451155	2451178	PTPN7	5778	1q32.1	0.0021	1	-0.0410038	-0.00306717	Alternative Products		FALSE
2663551	2663554	NUP210	23225	3p25.1	0.0022	1	-0.13093	-0.0962286			FALSE
3397589	3397596	ETS1	2113	11q23.3	0.0022	1	0.0465721	0.0617736	Alternative Products		FALSE
3945180	3945189	PICK1	9463	22q13.1	0.0023	1	0.0441856	0.0818108			TRUE
3190893	3190924	FAM73B	84895	9q34.11	0.0023	1	0.0195088	0.055503			FALSE
2950629	2950643	TAPBP	6892	6p21.3	0.0023	1	-0.379021	-0.319829	Alternative Products	Bare lymphocyte syndrome, type I,	TRUE
2496628	2496652	C2orf29	55571	2q11.2	0.0023	1	0.082504	0.0974685			TRUE
3822195	3822208	BTBD14B	112939	19p13.13	0.0024	1	0.061115	0.0882739			FALSE
3031383	3031395	REPIN1	29803	7q36.1	0.0025	1	0.167737	0.182552			FALSE
3281068	3281092	PIP4K2A	5305	10p12.2	0.0026	1	-0.221052	-0.147251			TRUE
3082248	3082252	FAM62B	57488	7q36.3	0.0026	1	-0.018521	0.00984955			FALSE
3190558	3190572	SPTAN1	6709	9q33-q34	0.0028	1	0.110685	0.124952	Alternative Products		TRUE
3394123	3394161	HYOU1	10525	11q23.1-q23.3	0.0028	1	-0.011675	0.017538			TRUE
3816112	3816138	SCAMP4	113178	19p13.3	0.0028	1	0.0808715	0.112826	Alternative Products		TRUE
2877861	2877880	SLC23A1	9963	5q31.2-q31.3	0.0029	1	0.134751	0.166335	Alternative Products		TRUE
3715703	3715713	SUPT6H	6830	17q11.2	0.003	1	0.0733352	0.0965248	Alternative Products		FALSE
3553337	3553383	TRAF3	7187	14q32.32	0.003	1	0.101135	0.116469			TRUE
3978999	3979012	UBQLN2	29978	Xp11.23-p11.1	0.0031	1	0.0202367	0.0446842			FALSE
3434413	3434462	RNF10	9921	12q24.31	0.0032	1	-0.174662	-0.136599			FALSE
3980758	3980768	MED12	9968	Xq13	0.0032	1	0.0501895	0.0694838			TRUE
2565262	2565323	ASCC3L1	23020	2q11.2	0.0032	1	-0.148688	-0.11699	Alternative Products		TRUE
3014411	3014452	TRRAP	8295	7q21.2-q22.1	0.0032	1	0.0653728	0.0820781	Alternative Products		TRUE
2617563	2617578	MYD88	4615	3p22	0.0033	1	-0.289521	-0.226804			FALSE
3442205	3442207	ZNF384	171017	12p12	0.0033	1	-0.113464	-0.0792667	Alternative Products		FALSE
3816264	3816289	DOT1L	84444	19p13.3	0.0036	1	0.166271	0.181735	Alternative Products		TRUE
3556924	3556959	PRMT5	10419	14q11.2-q21	0.0037	1	-0.180863	-0.152184			TRUE
4009315	4009406	HUWE1	10075	Xp11.22	0.0037	1	0.0457787	0.0597472	Alternative Products		TRUE
2427720	2427723	TMEM77	128338	1p13.3	0.0039	1	-0.0584608	-0.0334679			FALSE
3820443	3820455	ICAM1	3383	19p13.3-p13.2	0.0039	1	-0.0856211	-0.0675599		Malaria, cerebral, susceptibility to,	FALSE
3440598	3440612	FOXM1	2305	12p13	0.0039	1	-0.200224	-0.147688	Alternative Products		TRUE
2407729	2407749	RRAGC	64121	1p34	0.004	1	0.00912273	0.0563481			TRUE
3157901	3157977	PLEC1	5339	8q24	0.004	1	0.113901	0.177092	Alternative Products	Epidermolysis bullosa simplex, Ogna type, Muscular dystrophy with epidermolysis bullosa simplex,	TRUE
3707642	3707692	RABEP1	9135	17p13.2	0.004	1	-0.0913945	-0.0507825	Alternative Products		FALSE
3734865	3734900	TSEN54	283989	17q25.1	0.004	1	-0.0221467	0.00888012	Alternative Products		TRUE
3841474	3841503	LENG8	114823	19q13.42	0.0041	1	-0.104343	-0.068444			FALSE
3747657	3747660	FLCN	201163	17p11.2	0.0041	1	0.168222	0.197267		Birt-Hogg-Dube syndrome, Colorectal cancer, somatic, Pneumothorax, primary spontaneous, Renal carcinoma, chromophobe, somatic,	FALSE
2609904	2609930	OGG1	4968	3p26.2	0.0041	1	0.228699	0.267668	Alternative Products	Renal cell carcinoma, clear cell, somatic,	FALSE
3320301	3320352	CTR9	9646	11p15.3	0.0041	1	-0.16511	-0.125674			TRUE
3838385	3838411	CD37	951	19q13.3	0.0041	1	-0.0239919	-0.00087522			FALSE
2950629	2950636	TAPBP	6892	6p21.3	0.0041	1	-0.373004	-0.326143	Alternative Products	Bare lymphocyte syndrome, type I,	TRUE
3274361	3274410	KLF6	1316	10p15	0.0043	1	0.0334247	0.060208	Alternative Products	Gastric cancer, somatic, Prostate cancer, somatic,	FALSE
3432438	3432463	OAS1	4938	12q24.1	0.0044	1	-0.210046	-0.114661	Alternative Products	Diabetes mellitus, type 1, susceptibility to, Viral infection, susceptibility to,	FALSE
2949380	2949408	VARS	7407	6p21.3	0.0044	1	0.120799	0.153287			TRUE
3204744	3204812	TLN1	7094	9p13	0.0044	1	0.0309092	0.0433629			TRUE
3252382	3252454	MYST4	23522	10q22.2	0.0046	1	0.0445821	0.0694457	Alternative Products		TRUE
3851826	3851829	DNASE2	1777	19p13.2	0.0047	1	0.112196	0.142624			FALSE
3908631	3908685	PREX1	57580	20q13.13	0.0049	1	0.0214792	0.0375188	Alternative Products		TRUE
2964350	2964390	MDN1	23195	6q15	0.0051	1	0.0827622	0.111378			TRUE
2908100	2908131	POLH	5429	6p21.1	0.0054	1	-0.114534	-0.0803386	Alternative Products	Xeroderma pigmentosum, variant type,	FALSE
3825713	3825762	GATAD2A	54815	19p13.11	0.0056	1	0.161346	0.186867	Alternative Products		FALSE
2360083	2360100	UBAP2L	9898	1q21.3	0.0056	1	0.0303596	0.0528163	Alternative Products		TRUE
2369484	2369510	TOR3A	64222	1q25.2	0.0056	1	-0.00259294	0.0387184			FALSE
2565262	2565321	ASCC3L1	23020	2q11.2	0.0057	1	0.0470157	0.0692431	Alternative Products		TRUE
3654859	3654878	ATXN2L	11273	16p11	0.0058	1	0.0287462	0.0559312	Alternative Products		TRUE
2625606	2625643	APPL1	26060	3p21.1-p14.3	0.006	1	-0.0746751	-0.0397631			TRUE
3543714	3543722	ACOT4	122970	14q24.3	0.006	1	0.0253018	0.0749868			TRUE
3960110	3960118	MFNG	4242	22q12	0.0061	1	-0.00285274	0.0230218			TRUE
3652489	3652531	POLR3E	55718	16p12.1	0.0061	1	0.00852694	0.0377905	Alternative Products		FALSE
3758157	3758159	BECN1	8678	17q21	0.0061	1	-0.0761636	-0.0247803			FALSE
3781531	3781613	CABLES1	91768	18q11.2	0.0061	1	-0.0792915	-0.0542111	Alternative Products		FALSE
2474341	2474364	CAD	790	2p22-p21	0.0062	1	0.106142	0.125344			TRUE
2399765	2399766	CAPZB	832	1p36.1	0.0062	1	-0.147663	-0.111668	Alternative Products		FALSE
3561039	3561043	NFKBIA	4792	14q13	0.0066	1	0.0491564	0.0596793		Ectodermal dysplasia, anhidrotic, with T-cell immunodeficiency,	TRUE
3976299	3976340	ARAF	369	Xp11.4-p11.2	0.0066	1	-0.216013	-0.182516			FALSE
2830742	2830751	JMJD1B	51780	5q31	0.0066	1	-0.128807	-0.103992			TRUE
2950307	2950317	HLA-DOA	3111	6p21.3	0.0066	1	0.289977	0.312143			TRUE
3564071	3564122	NIN	51199	14q22.1	0.0066	1	0.0161963	0.0568416	Alternative Products		TRUE
2573641	2573642	CLASP1	23332	2q14.2-q14.3	0.0066	1	-0.213539	-0.158274	Alternative Products		FALSE
2920906	2920936	SMPD2	6610	6q21	0.0066	1	0.010822	0.036433			TRUE
3722554	3722567	DHX8	1659	17q21.31	0.0066	1	0.0284726	0.0523886			TRUE
3704717	3704736	ANKRD11	29123	16q24.3	0.0066	1	-0.065923	-0.0329074			TRUE
4026956	4026998	HCFC1	3054	Xq28	0.0066	1	-0.118987	-0.0961759	Alternative Products		TRUE
3707642	3707689	RABEP1	9135	17p13.2	0.0067	1	-0.0612724	-0.0330046	Alternative Products		FALSE
2360083	2360094	UBAP2L	9898	1q21.3	0.0068	1	0.0601001	0.0735968	Alternative Products		TRUE
3338424	3338435	FADD	8772	11q13.3	0.0068	1	0.0159427	0.0607091			FALSE
3847252	3847291	SAFB2	9667	19p13.3	0.0069	1	0.0420817	0.0849205			TRUE
3697015	3697045	AARS	16	16q22	0.0069	1	-0.0785397	-0.0611694			TRUE
2389789	2389820	SCCPDH	51097	1q44	0.0069	1	-0.0183514	0.0171617			FALSE
3848492	3848508	FCER2	2208	19p13.3	0.0069	1	0.0950931	0.105759	Alternative Products		TRUE
3457824	3457837	TIMELESS	8914	12q12-q13	0.0069	1	0.0673229	0.123116	Alternative Products		TRUE
3251393	3251408	DDIT4	54541	10pter-q26.12	0.0069	1	0.0463678	0.0741795			FALSE
3935243	3935252	LSS	4047	21q22.3	0.0069	1	0.00582888	0.0310037			TRUE
3697015	3697047	AARS	16	16q22	0.0069	1	-0.0039997	0.0082469			TRUE
3491948	3491996	TDRD3	81550	13q21.2	0.0069	1	0.160919	0.188639			TRUE
3418214	3418244	MBD6	114785	---	0.0071	1	0.216294	0.240925			FALSE
3447863	3447866	KRAS	3845	12p12.1	0.0071	1	0.0192388	0.0500219	Alternative Products	Bladder cancer, Bladder cancer, somatic, Breast cancer, somatic, Colorectal cancer, Costello syndrome, Leukemia, acute myelogenous, Lung cancer, Noonan syndrome 3, Pancreatic carcinoma, somatic, Stomach cancer, Thyroid carcinoma, follicular, Thyroid carcinoma, follicular, somatic,	FALSE
3366519	3366525	FANCF	2188	11p15	0.0071	1	0.18488	0.237508		Fanconi anemia, complementation group F,	FALSE
3644541	3644584	TRAF7	84231	16p13.3	0.0071	1	0.0998507	0.124366	Alternative Products		FALSE
3564071	3564120	NIN	51199	14q22.1	0.0071	1	-0.00567501	0.03836	Alternative Products		TRUE
3203753	3203823	UBAP2	55833	9p13.3	0.0073	1	0.0203651	0.0382458			TRUE
3862471	3862477	AKT2	208	19q13.1-q13.2	0.0075	1	-0.0106433	0.0269207		Diabetes mellitus, type II,	FALSE
3857811	3857813	C19orf12	83636	19q12	0.0075	1	0.0617292	0.101728			FALSE
3480013	3480032	MPHOSPH8	54737	13q12.11	0.0075	1	-0.0454426	0.0126821			TRUE
3131916	3131954	WHSC1L1	54904	8p11.2	0.0076	1	0.0374438	0.0645944		Leukemia, acute myeloid,	TRUE
3419239	3419304	MON2	23041	12q14.1	0.0076	1	0.0470078	0.0694184			TRUE
3472225	3472234	DDX54	79039	12q24.13	0.008	1	0.16279	0.178947			TRUE
3414390	3414417	SMARCD1	6602	12q13-q14	0.0082	1	0.0226077	0.0443376	Alternative Products		FALSE
3542207	3542229	SFRS5	6430	14q24	0.0085	1	0.0708339	0.0898957	Alternative Products		TRUE
3337067	3337069	RPS6KB2	6199	11q13.1	0.0085	1	-0.234871	-0.199177			TRUE
3816509	3816525	GADD45B	4616	19p13.3	0.0086	1	0.0539424	0.071757			FALSE
3709244	3709260	CHD3	1107	17p13.1	0.0086	1	0.0299153	0.0547308	Alternative Products		TRUE
2807862	2807884	LOC285636	285636	5p13.1	0.0086	1	0.0629918	0.0903563			FALSE
2331727	2331739	CAP1	10487	1p34.2	0.0086	1	0.011078	0.0238933			TRUE
3458337	3458372	STAT6	6778	12q13	0.0086	1	-0.006727	0.013522			TRUE
2326561	2326595	RPS6KA1	6195	1p	0.0087	1	-0.0119775	0.0152646			TRUE
3354227	3354236	NRGN	4900	11q24	0.0087	1	-0.116976	-0.0708788			FALSE
3768015	3768087	HELZ	9931	17q24.2	0.0088	1	-0.0266699	0.000219381			FALSE
3722917	3722941	GRN	2896	17q21.32	0.0091	1	0.0209523	0.0315611	Alternative Products	Frontotemporal dementia, ubiquitin-positive,	TRUE
3832978	3832988	ZFP36	7538	19q13.1	0.0091	1	0.256501	0.295487			FALSE
2855058	2855064	OXCT1	5019	5p13.1	0.0092	1	0.0781421	0.10641		Succinyl CoA:3-oxoacid CoA transferase deficiency,	FALSE
2829171	2829195	TCF7	6932	5q31.1	0.0095	1	0.184335	0.274587	Alternative Products		FALSE
3637006	3637007	SEC11A	23478	15q25.3	0.0095	1	-0.105304	-0.0468724			FALSE
4009315	4009412	HUWE1	10075	Xp11.22	0.0095	1	0.125846	0.136143	Alternative Products		TRUE
3708704	3708710	POLR2A	5430	17p13.1	0.0095	1	0.0425864	0.057106			TRUE
3402506	3402519	CD27	939	12p13	0.0095	1	0.0419332	0.0607355			FALSE
2360083	2360097	UBAP2L	9898	1q21.3	0.0095	1	-0.0736751	-0.0478503	Alternative Products		TRUE
2815043	2815105	TNPO1	3842	5q13.2	0.0095	1	-0.0362331	-0.0119919			FALSE
3817984	3818010	SAFB	6294	19p13.3-p13.2	0.0095	1	0.0710831	0.0901175			TRUE
3617312	3617324	SLC12A6	9990	15q13-q15	0.0095	1	-0.0260605	0.0218491	Alternative Products	Agenesis of corpus callosum with peripheral neuropathy (Andermann syndrome), Agenesis of the corpus callosum with peripheral neuropathy,	TRUE
3887635	3887655	NCOA3	8202	20q12	0.0095	1	-0.0222794	-0.00871429	Alternative Products		FALSE
2827185	2827209	LMNB1	4001	5q23.3-q31.1	0.0097	1	-0.211329	-0.156828		Leukodystrophy, adult-onset, autosomal dominant,	FALSE
3697015	3697041	AARS	16	16q22	0.0097	1	-0.00809701	0.00140644			TRUE
2901687	2901695	ABCF1	23	6p21.33	0.01	1	0.0166148	0.0354538	Alternative Products		TRUE
3941907	3941915	EWSR1	2130	22q12.2	1	0.01	0.234363	0.20226	Alternative Products	Chondrosarcoma, extraskeletal myxoid, Ewing sarcoma, Neuroepithelioma,	TRUE
3887635	3887697	NCOA3	8202	20q12	1	0.01	0.0704063	0.0564111	Alternative Products		TRUE
3476457	3476584	NCOR2	9612	12q24	1	0.01	0.0123238	-0.0107386	Alternative Products		TRUE
3474502	3474528	SFRS9	8683	12q24.31	1	0.01	0.165032	0.137897			FALSE
2399620	2399647	KIAA0090	23065	1p36.13	1	0.0099	0.115028	0.100206			TRUE
3812206	3812209	TXNDC10	54495	18q22	1	0.0098	0.061582	0.0239003	Alternative Products		FALSE
3821200	3821234	PRKCSH	5589	19p13.2	1	0.0098	-0.00391766	-0.022041		Polycystic liver disease,	TRUE
3811459	3811494	FVT1	2531	18q21.3	1	0.0096	0.132561	0.0947684		Lymphoma/leukemia, B-cell, variant,	FALSE
3959986	3959992	IL2RB	3560	22q13|22q13.1	1	0.0096	0.128622	0.113273			TRUE
3442427	3442441	MBOAT5	10162	12p13	1	0.0096	0.0160481	-0.00209843			TRUE
3680610	3680661	GSPT1	2935	16p13.1	1	0.0096	-0.177644	-0.220775			TRUE
3988365	3988383	WDR44	54521	Xq24	1	0.0095	0.259639	0.228334			TRUE
3885537	3885576	PLCG1	5335	20q12-q13.1	1	0.0094	-0.0866781	-0.1283			TRUE
2394626	2394645	ACOT7	11332	1p36.31-p36.11	1	0.0093	0.182157	0.148984	Alternative Products		TRUE
3158190	3158223	BOP1	23246	8q24.3	1	0.0092	0.0679941	0.0329045			TRUE
3712041	3712053	UBB	7314	17p12-p11.2	1	0.0092	-0.129674	-0.153152			TRUE
3561039	3561053	NFKBIA	4792	14q13	1	0.0092	-0.138749	-0.159673		Ectodermal dysplasia, anhidrotic, with T-cell immunodeficiency,	TRUE
2775965	2775991	COQ2	27235	4q21.23	1	0.0091	0.00290068	-0.0556214		Coenzyme Q10 deficiency,	TRUE
3573152	3573214	SPTLC2	9517	14q24.3-q31	1	0.0089	0.10215	0.0507182			TRUE
2520225	2520242	NAB1	4664	2q32.3-q33	1	0.0089	0.285099	0.257437	Alternative Products		TRUE
2828856	2828861	HSPA4	3308	5q31.1-q31.2	1	0.0089	0.108151	0.0912993			TRUE
2437645	2437678	GON4L	54856	1q22	1	0.0088	0.204677	0.178578			TRUE
3823982	3824066	MYO9B	4650	19p13.1	1	0.0088	0.111536	0.0969657	Alternative Products	Celiac disease, susceptibility to, 4,	TRUE
2831932	2832033	IK	3550	2p15-p14|5q31.3	1	0.0086	0.0249836	-0.00831797			FALSE
4009315	4009360	HUWE1	10075	Xp11.22	1	0.0086	-0.0408809	-0.0588757	Alternative Products		TRUE
3721926	3721943	TUBG1	7283	17q21	1	0.0086	0.0238175	0.00754197			TRUE
2540157	2540175	ODC1	4953	2p25	1	0.0086	0.0694442	0.0600101		Colonic adenoma recurrence, reduced risk of,	TRUE
3332938	3332951	C11orf79	54949	11q12.2	1	0.0086	0.277365	0.262624			TRUE
4025500	4025508	TMEM185A	84548	Xq28	1	0.0085	0.201419	0.167324			FALSE
2775463	2775546	HNRPD	3184	4q21.1-q21.2	1	0.0084	-0.362704	-0.403493	Alternative Products		FALSE
3431376	3431383	ANKRD13A	88455	12q24.11	1	0.0083	0.100792	0.0850282			TRUE
3847873	3847895	SLC25A23	79085	19p13.3	1	0.0081	0.03501	0.0184307			TRUE
2559967	2559972	DCTN1	1639	2p13	1	0.008	0.203621	0.177696		Amyotrophic lateral sclerosis, susceptibility to, Neuropathy, distal hereditary motor, type VIIB,	TRUE
3800779	3800796	ESCO1	114799	18q11.2	1	0.008	0.136642	0.111028	Alternative Products		TRUE
2495881	2495926	EIF5B	9669	2q11.2	1	0.008	0.303095	0.269394			TRUE
3286286	3286294	HNRPF	3185	10q11.21-q11.22	1	0.008	-0.0603028	-0.0947632			FALSE
3404436	3404450	CLEC2D	29121	12p13	1	0.008	0.18766	0.167242			TRUE
3865715	3865727	SYMPK	8189	19q13.3	1	0.008	0.107308	0.092773	Alternative Products		TRUE
2469910	2469935	LPIN1	23175	2p25.1	1	0.008	-0.137953	-0.209729			FALSE
2332013	2332040	NFYC	4802	1p32|1p32	1	0.0079	0.0400415	0.0147098	Alternative Products		TRUE
2379863	2379889	CENPF	1063	1q32-q41	1	0.0079	0.0106784	-0.0185314			TRUE
2343473	2343474	IFI44L	10964	1p31.1	1	0.0078	-0.0905956	-0.113362			FALSE
2532894	2532971	DGKD	8527	2q37.1	1	0.0078	0.0348154	0.0174893	Alternative Products		TRUE
3289631	3289645	CSTF2T	23283	10q11	1	0.0077	0.22084	0.186695			TRUE
3728037	3728039	SCPEP1	59342	17q22	1	0.0077	0.111941	0.0459215	Alternative Products		TRUE
2833078	2833082	NDFIP1	80762	5q31.3	1	0.0077	0.429383	0.373386	Alternative Products		TRUE
3948754	3948765	ATXN10	25814	22q13.31	1	0.0076	-0.0563305	-0.0891805		Spinocerebellar ataxia-10,	TRUE
3097152	3097164	MCM4	4173	8q11.2	1	0.0076	0.00996697	-0.00950781			TRUE
3941907	3941922	EWSR1	2130	22q12.2	1	0.0076	0.166211	0.134121	Alternative Products	Chondrosarcoma, extraskeletal myxoid, Ewing sarcoma, Neuroepithelioma,	TRUE
3281068	3281169	PIP4K2A	5305	10p12.2	1	0.0076	-0.0323992	-0.0534991			TRUE
2527786	2527802	CTDSP1	58190	2q35	1	0.0076	-0.0125038	-0.0277732			TRUE
3820758	3820828	DNM2	1785	19p13.2	1	0.0076	-0.0841827	-0.115238	Alternative Products	Charcot-Marie-Tooth disease, dominant intermediate 1, Charcot-Marie-Tooth disease, dominant intermediate B, Myopathy, centronuclear,	TRUE
3571347	3571353	NUMB	8650	14q24.3	1	0.0076	0.108525	0.0926656	Alternative Products		TRUE
3824648	3824660	CCDC124	115098	19p13.11	1	0.0076	0.110829	0.0834973			FALSE
3672368	3672385	KIAA0182	23199	16q24.1	1	0.0076	0.126042	0.0906418			TRUE
3874498	3874519	VISA	57506	20p13	1	0.0074	0.0474374	0.0234041	Alternative Products		FALSE
2559967	2559976	DCTN1	1639	2p13	1	0.0074	0.129674	0.104177		Amyotrophic lateral sclerosis, susceptibility to, Neuropathy, distal hereditary motor, type VIIB,	TRUE
3716048	3716056	TAOK1	57551	17q11.2	1	0.0074	0.166124	0.142777	Alternative Products		FALSE
2827525	2827543	SLC12A2	6558	5q23.3	1	0.0073	0.231651	0.181755	Alternative Products		TRUE
2454378	2454389	SLC30A1	7779	1q32-q41	1	0.0071	0.0500427	0.0068787			FALSE
3337390	3337403	TCIRG1	10312	11q13.2	1	0.007	-0.0268055	-0.0520341	Alternative Products	Osteopetrosis, recessive,	TRUE
2587841	2587858	WIPF1	7456	2q31.1	1	0.0069	0.012602	-0.00157586			TRUE
4026956	4026976	HCFC1	3054	Xq28	1	0.0069	0.0460141	0.0276832	Alternative Products		TRUE
2831932	2832011	IK	3550	2p15-p14|5q31.3	1	0.0069	0.359666	0.32639			FALSE
3570049	3570141	ERH	2079	14q24.1|7q34	1	0.0069	-0.428952	-0.502878			FALSE
2784113	2784125	CCNA2	890	4q25-q31	1	0.0069	0.177753	0.161307			TRUE
3225398	3225419	HSPA5	3309	9q33-q34.1	1	0.0069	-0.227078	-0.305003			FALSE
3229880	3229886	SNAPC4	6621	9q34.3	1	0.0069	0.195747	0.149154			TRUE
2461891	2461926	B3GALNT2	148789	1q42.3	1	0.0068	0.266684	0.226167			TRUE
3895118	3895127	CPXM1	56265	20p13-p12.3	1	0.0068	0.14221	0.110308			TRUE
3719362	3719392	AATF	26574	17q11.2-q12	1	0.0066	0.0595571	0.0431589			TRUE
3629698	3629730	DPP8	54878	15q22	1	0.0065	0.164689	0.13895	Alternative Products		TRUE
3992354	3992355	SLC9A6	10479	Xq26.3	1	0.0065	0.133182	0.0897846			TRUE
3570049	3570057	ERH	2079	14q24.1|7q34	1	0.0064	0.0439574	0.0162678			TRUE
3159946	3159979	SMARCA2	6595	9p22.3	1	0.0063	0.0207531	-0.00498748	Alternative Products		TRUE
3884830	3884859	PPP1R16B	26051	20q11.23	1	0.0063	0.0911952	0.0760892			TRUE
3413787	3413815	TUBA1C	84790	12q12-q14	1	0.0061	0.346573	0.322075			TRUE
2399409	2399529	UBR4	23352	1p36.13	1	0.0061	0.0273633	0.0106311			TRUE
3191724	3191786	ABL1	25	9q34.1	1	0.0061	7.2772e-05	-0.0284707	Alternative Products	Leukemia, Philadelphia chromosome-positive, resistant to imatinib,	TRUE
2949148	2949167	BAT3	7917	6p21.3	1	0.0061	0.0456886	0.0289282	Alternative Products		TRUE
2675628	2675652	VPRBP	9730	3p21.2	1	0.006	0.0955815	0.0809989			TRUE
3934111	3934122	SNF1LK	150094	21q22.3	1	0.0058	0.103511	0.0639121			TRUE
3815416	3815438	ABCA7	10347	19p13.3	1	0.0057	0.140973	0.115434			TRUE
3764471	3764493	MTMR4	9110	17q22-q23	1	0.0054	-0.00635262	-0.0225798			TRUE
3431892	3431906	SH2B3	10019	12q24	1	0.0053	0.0394942	-0.00293998			TRUE
3763148	3763175	COX11	1353	17q22	1	0.0053	0.202334	0.153528			TRUE
3656223	3656272	ITGAL	3683	16p11.2	1	0.0053	0.147634	0.130716	Alternative Products		TRUE
2363919	2363928	ATF6	22926	1q22-q23	1	0.0053	0.13964	0.123308			TRUE
3752258	3752265	EVI2B	2124	17q11.2	1	0.0051	0.0540259	0.0348687			TRUE
3941907	3941923	EWSR1	2130	22q12.2	1	0.0051	0.155888	0.12529	Alternative Products	Chondrosarcoma, extraskeletal myxoid, Ewing sarcoma, Neuroepithelioma,	TRUE
2705266	2705306	TNIK	23043	3q26.2-q26.31	1	0.0045	-0.034512	-0.0631013	Alternative Products		TRUE
3819543	3819603	HNRPM	4670	19p13.3-p13.2	1	0.0041	-0.360246	-0.399324	Alternative Products		FALSE
2458773	2458813	PARP1	142	1q41-q42	1	0.0041	-0.0190891	-0.03563			TRUE
3139580	3139631	SLCO5A1	81796	8q13.3	1	0.0041	0.112378	0.080759			FALSE
3221916	3221924	AKNA	80709	9q32	1	0.0041	0.0480354	0.0140574			TRUE
3558071	3558081	RABGGTA	5875	14q11.2	1	0.0038	0.214963	0.166894			TRUE
3718555	3718579	SLFN5	162394	17q12	1	0.0038	0.151971	0.123839			TRUE
3157385	3157418	TOP1MT	116447	8q24.3	1	0.0038	0.119854	0.0633875			TRUE
3502710	3502719	TFDP1	7027	13q34	1	0.0038	-0.0111163	-0.0458297			TRUE
3957873	3957894	EIF4ENIF1	56478	22q11.2	1	0.0038	0.150074	0.137587	Alternative Products		TRUE
3020444	3020445	CAPZA2	830	7q31.2-q31.3	1	0.0038	0.341498	0.291589			FALSE
2507380	2507437	R3HDM1	23518	2q21.3	1	0.0038	0.0830085	0.0642492			TRUE
3757840	3757889	STAT3	6774	17q21.31	1	0.0038	-0.146582	-0.166596	Alternative Products		TRUE
3774635	3774683	FASN	2194	17q25	1	0.0038	0.117715	0.105253			TRUE
3697015	3697024	AARS	16	16q22	1	0.0038	0.078698	0.0590708			TRUE
3784344	3784405	MAPRE2	10982	18q12.1	1	0.0038	0.176463	0.161051	Alternative Products		TRUE
2474341	2474381	CAD	790	2p22-p21	1	0.0037	-0.00199545	-0.0364469			TRUE
2878726	2878760	HDAC3	8841	5q31	1	0.0037	-0.0675955	-0.102907	Alternative Products		TRUE
3457455	3457470	SMARCC2	6601	12q13-q14	1	0.0037	-0.068461	-0.0975279	Alternative Products		TRUE
2831932	2831993	IK	3550	2p15-p14|5q31.3	1	0.0037	0.157171	0.12199			FALSE
3335907	3335916	SF3B2	10992	11q13.1	1	0.0037	-0.0385742	-0.0656561			TRUE
3236448	3236450	SUV39H2	79723	10p13	1	0.0037	0.553996	0.507658	Alternative Products		TRUE
3907652	3907658	NCOA5	57727	20q12-q13.12	1	0.0037	0.126363	0.0934128			TRUE
2340845	2340849	MIER1	57708	1p31.3	1	0.0036	0.421747	0.382474	Alternative Products		TRUE
2567242	2567247	CHST10	9486	2q11.2	1	0.0036	0.0416698	-0.0290854			FALSE
2638017	2638025	C3orf1	51300	3q13.33	1	0.0036	-0.0691095	-0.114222			TRUE
3555340	3555392	TEP1	7011	14q11.2	1	0.0036	-0.0866254	-0.119315	Alternative Products		TRUE
3739162	3739305	TBCD	6904	17q25.3	1	0.0036	0.0817101	0.0640954			TRUE
2436985	2437010	SHC1	6464	1q21	1	0.0036	0.299546	0.260304	Alternative Products		TRUE
2673648	2673672	NCKIPSD	51517	3p21	1	0.0036	0.180031	0.156417	Alternative Products		TRUE
3404436	3404469	CLEC2D	29121	12p13	1	0.0036	0.233535	0.164213			FALSE
4009238	4009249	SMC1A	8243	Xp11.22-p11.21	1	0.0035	0.0292219	0.0104153		Cornelia de Lange syndrome 2,	TRUE
3179872	3179874	FAM120A	23196	9q22.31	1	0.0035	-0.112816	-0.145219			TRUE
3712041	3712052	UBB	7314	17p12-p11.2	1	0.0034	0.044884	0.0272315			TRUE
2996033	2996035	KIAA0241	23080	7p14.3	1	0.0033	0.14683	0.0595784			FALSE
3569754	3569766	ZFP36L1	677	14q22-q24	1	0.0033	-0.0644999	-0.0853777			TRUE
3883971	3883972	C20orf24	55969	20q11.23	1	0.0032	0.090995	0.0478148	Alternative Products		FALSE
2871923	2871928	ATG12	9140	5q21-q22	1	0.0032	0.285719	0.114757	Alternative Products		FALSE
3772090	3772130	TMC6	11322	17q25.3	1	0.0032	0.0718225	0.0463232	Alternative Products	Epidermodysplasia verruciformis,	TRUE
2413578	2413611	TMEM59	9528	1p36-p31	1	0.0031	-0.0861061	-0.134925			TRUE
2399409	2399565	UBR4	23352	1p36.13	1	0.0031	0.0733049	0.0572708			TRUE
2672857	2672874	SMARCC1	6599	3p23-p21	1	0.0031	0.112575	0.0959127			TRUE
2375664	2375665	BTG2	7832	1q32	1	0.0031	-0.0719521	-0.101842			FALSE
3404436	3404468	CLEC2D	29121	12p13	1	0.003	0.162646	0.0869903			FALSE
3624362	3624381	LEO1	123169	15q21.2	1	0.003	0.103176	0.0490745			FALSE
3996467	3996500	PLXNA3	55558	Xq28	1	0.003	0.0732627	0.0267989			TRUE
3511031	3511041	ELF1	1997	13q13	1	0.003	0.0925125	0.0810436			TRUE
3829020	3829021	PDCD5	9141	19q12-q13.1	1	0.0029	-0.0465582	-0.120213			FALSE
3715703	3715750	SUPT6H	6830	17q11.2	1	0.0028	0.0287051	0.0130579	Alternative Products		TRUE
2438892	2438918	FCRL5	83416	1q21	1	0.0028	0.0886136	0.050392			FALSE
3709244	3709312	CHD3	1107	17p13.1	1	0.0026	-0.00369038	-0.037006	Alternative Products		TRUE
2575134	2575159	POLR2D	5433	2q21	1	0.0025	0.343072	0.31248			FALSE
3119945	3119956	GRINA	2907	8q24.3	1	0.0025	-0.136165	-0.163463			TRUE
2813524	2813556	RAD17	5884	5q13	1	0.0025	0.338168	0.305617	Alternative Products		TRUE
3608113	3608115	IQGAP1	8826	15q26.1	1	0.0025	-0.111196	-0.143167			TRUE
3886223	3886248	MYBL2	4605	20q13.1	1	0.0024	0.0694035	0.0528744			TRUE
2795819	2795829	DCTD	1635	4q35.1	1	0.0024	0.00791369	-0.0262344			FALSE
2380991	2381003	IARS2	55699	1q41	1	0.0024	0.133833	0.110107			TRUE
3763148	3763172	COX11	1353	17q22	1	0.0022	0.373469	0.335565			TRUE
3337390	3337406	TCIRG1	10312	11q13.2	1	0.0022	-0.0322661	-0.0530866	Alternative Products	Osteopetrosis, recessive,	TRUE
3373724	3373765	SSRP1	6749	11q12	1	0.0022	-0.0406917	-0.0664457			FALSE
3542207	3542215	SFRS5	6430	14q24	1	0.0022	0.0911025	0.0738983	Alternative Products		TRUE
3722554	3722590	DHX8	1659	17q21.31	1	0.0022	0.0522324	0.0291053			TRUE
3301914	3301962	PIK3AP1	118788	10q24.1	1	0.0022	0.0169601	-0.00387596			TRUE
3303652	3303666	MRPL43	84545	10q24.31	1	0.0022	0.171346	0.121901	Alternative Products		TRUE
2964200	2964224	UBE2J1	51465	6q15	1	0.0022	0.0335726	0.00296605			TRUE
3107342	3107344	PPM2C	54704	8q22.1	1	0.0022	0.496484	0.439997		Pyruvate dehydrogenase phosphatase deficiency,	FALSE
3249788	3249824	CCAR1	55749	10q21.3	1	0.0022	0.180715	0.154377			TRUE
3594129	3594142	MAPK6	5597	15q21	1	0.0022	0.137026	0.110363			FALSE
3432514	3432520	OAS2	4939	12q24.2	1	0.0022	-0.0473814	-0.0763963	Alternative Products		FALSE
3158190	3158231	BOP1	23246	8q24.3	1	0.0022	0.0561117	0.0313448			TRUE
3014411	3014535	TRRAP	8295	7q21.2-q22.1	1	0.0021	0.0142608	-0.0203023	Alternative Products		FALSE
3703885	3703886	SLC7A5	8140	16q24.3	1	0.002	0.0552611	0.018029			FALSE
3755820	3755836	PERLD1	93210	17q12	1	0.002	0.370078	0.332414			FALSE
3512769	3512823	ZC3H13	23091	13q14.12	1	0.0019	0.222175	0.177463			TRUE
2400373	2400451	EIF4G3	8672	1p36.12	1	0.0019	0.0879127	0.0702757	Alternative Products		TRUE
3488985	3488991	ITM2B	9445	13q14.3	1	0.0019	-0.0676097	-0.107348		Dementia, familial British, Dementia, familial Danish,	TRUE
3447863	3447868	KRAS	3845	12p12.1	1	0.0019	0.464915	0.413825	Alternative Products	Bladder cancer, Bladder cancer, somatic, Breast cancer, somatic, Colorectal cancer, Costello syndrome, Leukemia, acute myelogenous, Lung cancer, Noonan syndrome 3, Pancreatic carcinoma, somatic, Stomach cancer, Thyroid carcinoma, follicular, Thyroid carcinoma, follicular, somatic,	TRUE
2949859	2949871	PBX2	5089	6p21.3	1	0.0018	0.207615	0.157965			TRUE
3335774	3335801	SART1	9092	11q13.1	1	0.0017	0.147576	0.120054			TRUE
2964350	2964432	MDN1	23195	6q15	1	0.0017	0.0824274	0.0550001			TRUE
3571553	3571575	C14orf43	91748	14q24.3	1	0.0016	0.0693901	0.0215035			TRUE
4026956	4026978	HCFC1	3054	Xq28	1	0.0016	0.0991406	0.0839275	Alternative Products		TRUE
2492015	2492016	MRPL35	51318	2p11.2	1	0.0016	0.143662	0.0911674			TRUE
3891278	3891303	TH1L	51497	20q13	1	0.0016	0.129138	0.105056	Alternative Products		TRUE
3417457	3417466	MYL6	4637	12q13.2	1	0.0016	-0.0192626	-0.0510849	Alternative Products		TRUE
3138464	3138524	PDE7A	5150	8q13	1	0.0016	-0.0593413	-0.0883509	Alternative Products		TRUE
3887635	3887695	NCOA3	8202	20q12	1	0.0016	0.0406321	0.0280777	Alternative Products		TRUE
2831932	2832015	IK	3550	2p15-p14|5q31.3	1	0.0016	0.0855241	0.0468539			FALSE
3180957	3180960	HABP4	22927	9q22.3-q31	1	0.0016	0.120421	0.0656986			TRUE
3615985	3616042	MTMR10	54893	15q13.3	1	0.0015	0.0613195	0.00622049			TRUE
3236395	3236409	HSPA14	51182	10p13	1	0.0015	0.112823	0.0812993			TRUE
3573152	3573212	SPTLC2	9517	14q24.3-q31	1	0.0014	-0.0127082	-0.0512151			TRUE
3261447	3261462	PPRC1	23082	10q24.32	1	0.0013	0.123501	0.105873			TRUE
3892409	3892411	LSM14B	149986	20q13.33	1	0.0013	0.156215	0.124008			TRUE
3373724	3373768	SSRP1	6749	11q12	1	0.0013	0.0136524	-0.0224436			FALSE
2950629	2950650	TAPBP	6892	6p21.3	1	0.0013	-0.147404	-0.171476	Alternative Products	Bare lymphocyte syndrome, type I,	TRUE
3819543	3819697	HNRPM	4670	19p13.3-p13.2	1	0.0012	-0.203269	-0.236407	Alternative Products		FALSE
3819543	3819545	HNRPM	4670	19p13.3-p13.2	1	0.0012	-0.172603	-0.230202	Alternative Products		FALSE
3251393	3251406	DDIT4	54541	10pter-q26.12	1	0.0012	0.103236	0.072806			TRUE
3543539	3543555	PAPLN	89932	14q24.2	1	0.0012	0.174443	0.107555			TRUE
2968232	2968365	SNX3	8724	6q21	1	0.0012	0.598008	0.563886	Alternative Products	Microphthalmia, syndromic 8,	FALSE
3479355	3479420	GOLGA3	2802	12q24.33	1	0.0012	-0.00452463	-0.0648079	Alternative Products		TRUE
3404436	3404471	CLEC2D	29121	12p13	1	0.0012	0.325986	0.237716			FALSE
3819543	3819608	HNRPM	4670	19p13.3-p13.2	1	0.0012	0.140516	0.125332	Alternative Products		FALSE
3114365	3114384	FAM91A1	157769	8q24.13	1	0.0012	0.044003	0.0163838			TRUE
3555340	3555419	TEP1	7011	14q11.2	1	0.0012	0.0751815	-0.0417199	Alternative Products		TRUE
2877141	2877153	HNRNPA0	10949	5q31	1	0.0012	-0.028925	-0.0505345			TRUE
2964200	2964223	UBE2J1	51465	6q15	1	0.0011	0.122355	0.106629			TRUE
2831932	2831981	IK	3550	2p15-p14|5q31.3	1	0.0011	0.0714037	0.0292603			FALSE
3617830	3617841	ZNF770	54989	15q14	1	0.0011	0.0438998	-0.0088875			FALSE
3552847	3552936	DYNC1H1	1778	14q32.3-qter|14q32	1	0.0011	0.0230957	0.000525647			TRUE
3320301	3320326	CTR9	9646	11p15.3	1	0.0009	0.107109	0.0879036			TRUE
3770699	3770701	MIF4GD	57409	17q25.1	1	0.0009	0.228995	0.202465			TRUE
3632940	3632942	UBL7	84993	15q24.1	1	0.0009	0.0173856	-0.00644983			TRUE
3264948	3264982	CASP7	840	10q25	1	0.0009	0.161889	0.120835	Alternative Products		TRUE
3708462	3708496	CENTB1	9744	17p13.1	1	0.0009	0.0767982	0.0510345			TRUE
3851826	3851836	DNASE2	1777	19p13.2	1	0.0009	0.038702	0.00336232			TRUE
2945882	2945939	CMAH	8418	6p21.32	1	0.0009	0.130086	0.0247743	Alternative Products		FALSE
2833286	2833386	ARHGAP26	23092	5q31	1	0.0009	0.276055	0.231393	Alternative Products	Leukemia, juvenile myelomonocytic,	TRUE
3644162	3644176	NUBP2	10101	16p13.3	1	0.0009	0.277755	0.250669			TRUE
3660858	3660893	CHD9	80205	16q12.2	1	0.0009	0.189072	0.16293			TRUE
3662387	3662393	HERPUD1	9709	16q12.2-q13	1	0.0009	0.0532962	0.0406757			TRUE
3678395	3678399	N-PAC	84656	16p13.3	1	0.0009	0.0112536	-0.0998021			TRUE
3587015	3587043	KLF13	51621	15q12	1	0.0008	-0.117055	-0.146863			TRUE
2827185	2827193	LMNB1	4001	5q23.3-q31.1	1	0.0008	0.152926	0.14021		Leukodystrophy, adult-onset, autosomal dominant,	TRUE
2868131	2868133	ERAP1	51752	5q15	1	0.0008	-0.178232	-0.291054	Alternative Products		FALSE
2363902	2363907	DUSP12	11266	1q21-q22	1	0.0008	0.0999358	0.0588629			TRUE
2394626	2394640	ACOT7	11332	1p36.31-p36.11	1	0.0008	0.175498	0.149834	Alternative Products		TRUE
3430894	3430912	USP30	84749	12q24.11	1	0.0008	0.215447	0.169201			TRUE
3432438	3432457	OAS1	4938	12q24.1	1	0.0008	-0.25114	-0.378148	Alternative Products	Diabetes mellitus, type 1, susceptibility to, Viral infection, susceptibility to,	TRUE
3357785	3357811	SIRT3	23410	11p15.5	1	0.0008	-0.0436206	-0.101602			TRUE
3892409	3892410	LSM14B	149986	20q13.33	1	0.0008	0.241493	0.189328			FALSE
2899506	2899516	HMGN4	10473	6p21.3	1	0.0008	0.0294202	0.00639022			TRUE
2833286	2833399	ARHGAP26	23092	5q31	1	0.0008	0.34689	0.300463	Alternative Products	Leukemia, juvenile myelomonocytic,	TRUE
3432438	3432458	OAS1	4938	12q24.1	1	0.0008	-0.191385	-0.316188	Alternative Products	Diabetes mellitus, type 1, susceptibility to, Viral infection, susceptibility to,	FALSE
3432514	3432519	OAS2	4939	12q24.2	1	0.0008	-0.195335	-0.242215	Alternative Products		TRUE
3645477	3645481	PAQR4	124222	16p13.3	1	0.0008	0.10212	0.0728638	Alternative Products		TRUE
3474697	3474728	UNQ1887	121665	12q24.31	1	0.0008	0.0190108	-0.0345263	Alternative Products		TRUE
3699178	3699209	WDR59	79726	16q23.1	1	0.0008	0.0979744	0.0600867			TRUE
2974469	2974534	STX7	8417	6q23.1	1	0.0007	0.299168	0.249043	Alternative Products		TRUE
3568080	3568095	WDR89	112840	14q23.2	1	0.0007	0.00739931	-0.121677			FALSE
3639031	3639058	PRC1	9055	15q26.1	1	0.0007	0.0214951	-0.0085436			TRUE
3816424	3816438	SPPL2B	56928	19p13.3	1	0.0007	0.145481	0.11663	Alternative Products		TRUE
2761285	2761298	FAM44A	259282	4p16.1	1	0.0007	0.485233	0.441697			TRUE
2401493	2401498	ID3	3399	1p36.13-p36.12	1	0.0007	-0.0781903	-0.177713			TRUE
3695541	3695553	FHOD1	29109	16q22	1	0.0007	-0.0710519	-0.131139			TRUE
3279575	3279625	RSU1	6251	10p13	1	0.0005	0.222895	0.0870611			TRUE
3986514	3986525	PRPS1	5631	Xq21.32-q24	1	0.0005	0.203456	0.187485	Alternative Products	Arts syndrome, Charcot-Marie-Tooth disease, X-linked recessive, 5, Gout, PRPS-related, Phosphoribosylpyrophosphate synthetase superactivity,	TRUE
3712041	3712051	UBB	7314	17p12-p11.2	1	0.0005	0.0331481	0.0126388			TRUE
2963929	2963967	RNGTT	8732	6q16	1	0.0004	0.0881978	0.0523796	Alternative Products		TRUE
3190558	3190627	SPTAN1	6709	9q33-q34	1	0.0004	0.113127	0.097818	Alternative Products		TRUE
3941907	3941919	EWSR1	2130	22q12.2	1	0.0003	0.182169	0.14185	Alternative Products	Chondrosarcoma, extraskeletal myxoid, Ewing sarcoma, Neuroepithelioma,	TRUE
2499158	2499183	RANBP2	5903	2q12.3	1	0.0003	0.116575	0.0938692			TRUE
2360083	2360139	UBAP2L	9898	1q21.3	1	0.0003	-0.0434814	-0.0618336	Alternative Products		TRUE
3621692	3621718	MFAP1	4236	15q15-q21	1	0.0003	0.200313	0.16865			TRUE
2404254	2404281	PUM1	9698	1p35.2	1	0.0003	0.0476145	0.027723	Alternative Products		TRUE
3866231	3866241	STRN4	29888	19q13.2	1	0.0002	0.128898	0.0866393			TRUE
3556888	3556916	RBM23	55147	14q11.2	1	0.0002	0.00190742	-0.0252018	Alternative Products		TRUE
2406064	2406102	SFPQ	6421	1p34.3	1	0.0002	-0.106761	-0.14594	Alternative Products		TRUE
3026988	3027006	LUC7L2	51631	7q34	1	0.0002	0.0674161	0.0248966	Alternative Products		TRUE
2833286	2833396	ARHGAP26	23092	5q31	1	0.0002	0.37658	0.334904	Alternative Products	Leukemia, juvenile myelomonocytic,	TRUE
3404436	3404451	CLEC2D	29121	12p13	1	0.0002	0.175968	0.157601			TRUE
3372459	3372513	FNBP4	23360	11p11.2	1	0.0002	-0.016946	-0.0466048			TRUE
2988459	2988472	RBAK	57786	7p22.1	1	0.0002	0.314789	0.28005			TRUE
2658346	2658348	OPA1	4976	3q28-q29|3q28-q29 /// 3q28-q29|3q28-q29 /// 3q28-q29|3q28-q29	1	0.0002	0.150811	0.0920195	Alternative Products	Glaucoma, normal tension, susceptibility to, Optic atrophy 1, Optic atrophy and deafness,	TRUE
3815165	3815193	PTBP1	5725	19p13.3	1	0.0002	0.0691013	0.0548273	Alternative Products		TRUE
3959631	3959764	EIF3D	8664	22q13.1	1	0.0001	-0.311474	-0.383988			FALSE
3735447	3735449	FAM100B	283991	17q25.1	1	0.0001	0.200944	0.173122			TRUE
3568108	3568121	SGPP1	81537	14q23.2	1	0.0001	0.0917817	0.0380769			TRUE
2920962	2921007	FIG4	9896	6q21	1	0.0001	0.13035	0.0943452		Charcot-Marie-Tooth disease, type 4J,	TRUE
3823982	3824070	MYO9B	4650	19p13.1	1	0.0001	0.142642	0.124378	Alternative Products	Celiac disease, susceptibility to, 4,	TRUE
2437645	2437686	GON4L	54856	1q22	1	0.0001	0.285038	0.255563			TRUE
2576281	2576306	LOC130074	130074	2q21.1	1	0.0001	-0.0242072	-0.0524758			FALSE
2406064	2406101	SFPQ	6421	1p34.3	1	0.0001	-0.198712	-0.242173	Alternative Products		TRUE
2854737	2854778	PRKAA1	5562	5p12	1	0.0001	0.180094	0.134672			FALSE
3453370	3453383	ARF3	377	12q13	1	0.0001	0.196945	0.183122			TRUE
2709062	2709095	SFRS10	6434	3q26.2-q27	1	0.0001	0.139841	0.126217	Alternative Products		TRUE
3432438	3432451	OAS1	4938	12q24.1	1	0.0001	0.0894093	0.078263	Alternative Products	Diabetes mellitus, type 1, susceptibility to, Viral infection, susceptibility to,	TRUE
3811459	3811493	FVT1	2531	18q21.3	1	0.0001	0.184138	0.137903		Lymphoma/leukemia, B-cell, variant,	TRUE
3303652	3303664	MRPL43	84545	10q24.31	1	0.0001	0.418818	0.370168	Alternative Products		TRUE
4009315	4009366	HUWE1	10075	Xp11.22	1	0.0001	-0.0291919	-0.053325	Alternative Products		TRUE
3903778	3903789	EDEM2	55741	20q11.22	1	0.0001	0.0302427	-0.0736125			TRUE
3725035	3725060	NFE2L1	4779	17q21.3	1	0.0001	0.10608	0.0924512	Alternative Products		TRUE
3708366	3708372	C17orf81	23587	17p13.1	1	0.0001	0.0364779	0.00584014			TRUE
3847782	3847788	GTF2F1	2962	19p13.3	1	0.0001	0.0898925	0.0687353			TRUE
2831932	2832041	IK	3550	2p15-p14|5q31.3	1	0.0001	0.275544	0.237904			FALSE
3426502	3426509	PLXNC1	10154	12q23.3	1	0.0001	-0.0697459	-0.11123			TRUE
3426917	3426969	METAP2	10988	12q22	1	0.0001	0.109952	0.0646982			FALSE
3725392	3725419	CALCOCO2	10241	17q21.32	1	0.0001	0.209069	0.179789			TRUE
2406064	2406103	SFPQ	6421	1p34.3	1	0.0001	0.0143895	-0.0233425	Alternative Products		TRUE
3693533	3693572	CSNK2A2	1459	16q21	1	0.0001	0.121096	0.0535453			FALSE
2705266	2705311	TNIK	23043	3q26.2-q26.31	1	0.0001	0.0571582	0.0371593	Alternative Products		TRUE
2688717	2688738	BTLA	151888	3q13.2	1	0.0001	0.0357544	0.0179494			TRUE
2350287	2350294	PRPF38B	55119	1p13.3	1	0.0001	0.00245765	-0.0475304			TRUE
3666033	3666053	NFATC3	4775	16q22.2	1	0.0001	0.135711	0.114974	Alternative Products		TRUE
3312490	3312511	MKI67	4288	10q25-qter	1	0.0001	0.0811782	0.0666026	Alternative Products		TRUE
3727712	3727725	PCTP	58488	17q21-q24	1	0.0001	0.441689	0.388585			TRUE
3707642	3707650	RABEP1	9135	17p13.2	1	0.0001	0.125689	0.0997735	Alternative Products		TRUE
3976062	3976100	UBA1	7317	Xp11.23	1	0.0001	0.0662164	0.0508799			TRUE
2867836	2867854	GLRX	2745	5q14	1	0.0001	0.317782	0.263475			TRUE
3766651	3766702	ERN1	2081	17q24.2	1	0.0001	0.087028	0.0364712			FALSE
3821015	3821042	LDLR	3949	19p13.3	1	0.0001	0.0703057	0.0421457		Hypercholesterolemia, familial,	TRUE
3621692	3621719	MFAP1	4236	15q15-q21	1	0.0001	0.336572	0.298341			FALSE
3997946	3997976	PRKX	5613	Xp22.3	1	0.0001	-0.0750372	-0.120531			TRUE
2474341	2474382	CAD	790	2p22-p21	1	0.0001	0.0407673	4.84041e-05			TRUE
2954771	2954792	GTPBP2	54676	6p21-p12	1	0	0.0237727	-0.0123787			TRUE
2971801	2971899	MAN1A1	4121	6q22	1	0	-0.0100496	-0.0382064			TRUE
2350840	2350846	GNAI3	2773	1p13	1	0	0.289162	0.256495			TRUE
3697015	3697025	AARS	16	16q22	1	0	0.0908284	0.0740732			TRUE
3725035	3725058	NFE2L1	4779	17q21.3	1	0	0.088996	0.076483	Alternative Products		TRUE
3026988	3026990	LUC7L2	51631	7q34	1	0	0.219785	0.17719	Alternative Products		FALSE
2988459	2988467	RBAK	57786	7p22.1	1	0	0.149816	0.116588			TRUE
2938196	2938218	EXOC2	55770	6p25.3	1	0	0.088315	0.0317523			TRUE
3742130	3742134	MYBBP1A	10514	17p13.3	1	0	0.152535	0.132045	Alternative Products		TRUE
3904189	3904218	NFS1	9054	20q11.22	1	0	0.105008	0.0544486	Alternative Products		TRUE
3159946	3159993	SMARCA2	6595	9p22.3	1	0	0.0185939	-0.00723744	Alternative Products		TRUE
3015216	3015230	COPS6	10980	7q22.1	1	0	0.0455433	0.0293051			TRUE
2495881	2495934	EIF5B	9669	2q11.2	1	0	0.214171	0.176406			FALSE
2412529	2412541	NRD1	4898	1p32.2-p32.1	1	0	0.0551254	0.033995	Alternative Products		TRUE
3037304	3037307	MGC12966	84792	7p22.1	1	0	0.2003	0.133668			TRUE
3354227	3354234	NRGN	4900	11q24	1	0	0.199093	0.131107			TRUE
3817501	3817531	CHAF1A	10036	19p13.3	1	0	0.109808	0.0546927	Alternative Products		TRUE
2705266	2705309	TNIK	23043	3q26.2-q26.31	1	0	0.0704817	0.0456693	Alternative Products		TRUE
3775038	3775044	C17orf62	79415	17q25.3	1	0	0.0284172	0.00614693			TRUE
3838118	3838136	RUVBL2	10856	19q13.3	1	0	0.0619009	0.0380293			TRUE
3959451	3959463	MYH9	4627	22q13.1	1	0	0.0301417	0.00549287		Deafness, autosomal dominant 17, Epstein syndrome, Fechtner syndrome, Macrothrombocytopenia and progressive sensorineural deafness, May-Hegglin anomaly, Sebastian syndrome,	TRUE
4009315	4009363	HUWE1	10075	Xp11.22	1	0	-0.0264256	-0.04812	Alternative Products		TRUE
3089401	3089403	PPP3CC	5533	8p21.3	1	0	0.116324	0.0598913			TRUE
3359910	3359971	NUP98	4928	11p15.5	1	0	0.135978	0.118493	Alternative Products	Leukemia, lymphycytic, acute T-cell,	TRUE
3892941	3892970	OGFR	11054	20q13.3	1	0	0.171536	0.140066	Alternative Products		FALSE
3976062	3976101	UBA1	7317	Xp11.23	1	0	0.0258822	0.0131041			TRUE
3847420	3847446	DUS3L	56931	19p13.3	1	0	0.083487	0.0145793			TRUE
3114365	3114388	FAM91A1	157769	8q24.13	1	0	0.0576486	0.0292452			TRUE
3413787	3413816	TUBA1C	84790	12q12-q14	1	0	0.274006	0.247225			TRUE
2437645	2437681	GON4L	54856	1q22	1	0	0.314776	0.285565			TRUE
3697015	3697029	AARS	16	16q22	1	0	0.014915	-0.000787278			TRUE
2988459	2988471	RBAK	57786	7p22.1	1	0	0.198158	0.159941			TRUE
3909395	3909424	DPM1	8813	20q13.13	1	0	0.233496	0.210867		Congenital disorder of glycosylation, type Ie,	TRUE
3294242	3294253	ECD	11319	10q22.1	1	0	0.000790204	-0.0595481			TRUE
3150844	3150943	SNTB1	6641	8q23-q24	1	0	0.514184	0.392153	Alternative Products		TRUE
2831932	2831953	IK	3550	2p15-p14|5q31.3	1	0	0.288361	0.246604			FALSE
2495881	2495927	EIF5B	9669	2q11.2	1	0	0.301113	0.266461			TRUE
4000704	4000741	AP1S2	8905	Xp22.2	1	0	0.0144858	-0.0600622		Mental retardation, X-linked 59,	FALSE
2831932	2831979	IK	3550	2p15-p14|5q31.3	1	0	0.378716	0.345211			FALSE
3760137	3760212	KIAA1267	284058	17q21.31	1	0	0.103539	0.0677661			TRUE
2350287	2350290	PRPF38B	55119	1p13.3	1	0	0.0734201	0.0224667			TRUE
4026956	4026974	HCFC1	3054	Xq28	1	0	0.150548	0.133956	Alternative Products		TRUE
3236786	3236796	PTER	9317	10p12	1	0	0.033248	-0.0249514			FALSE
3393200	3393213	PCSK7	9159	11q23-q24	1	0	-0.0479055	-0.120357			TRUE
3150844	3150949	SNTB1	6641	8q23-q24	1	0	0.150357	0.00838875	Alternative Products		FALSE
2328465	2328484	KHDRBS1	10657	1p32	1	0	0.050513	0.0270184			TRUE
2963929	2963964	RNGTT	8732	6q16	1	0	-0.0932104	-0.186688	Alternative Products		FALSE
3563317	3563331	RPS29	6235	14q	1	0	-0.185861	-0.227418			TRUE
3320301	3320324	CTR9	9646	11p15.3	1	0	0.165221	0.135124			TRUE
3959451	3959461	MYH9	4627	22q13.1	1	0	0.0631822	0.0434647		Deafness, autosomal dominant 17, Epstein syndrome, Fechtner syndrome, Macrothrombocytopenia and progressive sensorineural deafness, May-Hegglin anomaly, Sebastian syndrome,	TRUE
3962494	3962500	POLDIP3	84271	22q13.2	1	0	0.0434037	-0.0269632	Alternative Products		FALSE
3150844	3150946	SNTB1	6641	8q23-q24	1	0	0.0333062	-0.118403	Alternative Products		FALSE
2920962	2921005	FIG4	9896	6q21	1	0	0.0385325	-0.0135291		Charcot-Marie-Tooth disease, type 4J,	TRUE
3322717	3322759	GTF2H1	2965	11p15.1-p14	1	0	-0.0629966	-0.131896			FALSE
2877141	2877152	HNRNPA0	10949	5q31	1	0	0.124976	0.10516			TRUE
2950329	2950333	HLA-DPA1	3113	6p21.3	1	0	-0.0180726	-0.183421			FALSE
3766373	3766394	FTSJ3	117246	17q23	1	0	0.0821222	0.0321514			TRUE
3819543	3819587	HNRPM	4670	19p13.3-p13.2	1	0	-0.235115	-0.280706	Alternative Products		FALSE
3962145	3962146	TNFRSF13C	115650	22q13.1-q13.31	1	0	0.0321124	0.00686003	Alternative Products		FALSE
3471374	3471385	PPP1CC	5501	12q24.1-q24.2	1	0	0.0581927	0.0254673	Alternative Products		TRUE
3923354	3923357	AGPAT3	56894	21q22.3	1	0	0.0163445	-0.0507746	Alternative Products		FALSE
2963929	2963965	RNGTT	8732	6q16	1	0	0.0999907	0.02943	Alternative Products		FALSE
2670784	2670807	SEC22C	9117	3p22.1	1	0	-0.00255995	-0.0825496			TRUE
2474341	2474383	CAD	790	2p22-p21	1	0	0.159848	0.119828			TRUE
3293963	3293994	DNAJB12	54788	10q22.1	1	0	0.295283	0.246124			FALSE
3159330	3159416	DOCK8	81704	9p24.3	1	0	0.0106016	-0.041512	Alternative Products		FALSE
3279575	3279659	RSU1	6251	10p13	1	0	-0.0653007	-0.16233			TRUE
3994100	3994102	FMR1	2332	Xq27.3	1	0	0.307972	0.226556	Alternative Products	Fragile X syndrome, Fragile X tremor/ataxia syndrome,	TRUE
3759077	3759083	SLC25A39	51629	17q12	1	0	0.0427972	-0.0882404			TRUE
2939892	2939933	LYRM4	57128	6p25.1	1	0	0.0487086	0.00359229			TRUE
3190558	3190620	SPTAN1	6709	9q33-q34	1	0	0.00467404	-0.021007	Alternative Products		TRUE
3190558	3190619	SPTAN1	6709	9q33-q34	1	0	0.00898676	-0.0294753	Alternative Products		TRUE
2888519	2888546	UIMC1	51720	5q35.2	1	0	0.196706	0.141176			TRUE
3032017	3032025	NUB1	51667	7q36	1	0	0.0133086	-0.0407919	Alternative Products		FALSE
3959451	3959460	MYH9	4627	22q13.1	1	0	0.0992684	0.0780248		Deafness, autosomal dominant 17, Epstein syndrome, Fechtner syndrome, Macrothrombocytopenia and progressive sensorineural deafness, May-Hegglin anomaly, Sebastian syndrome,	TRUE
3965393	3965401	ALG12	79087	22q13.33	1	0	-0.0588031	-0.21086		Congenital disorder of glycosylation, type Ig,	TRUE
2379863	2379890	CENPF	1063	1q32-q41	1	0	-0.0217388	-0.0642513			TRUE
3476796	3476817	DHX37	57647	12q24.31	1	0	0.0371275	-0.0322071			TRUE
3819543	3819663	HNRPM	4670	19p13.3-p13.2	1	0	0.165699	0.12305	Alternative Products		FALSE
3819543	3819693	HNRPM	4670	19p13.3-p13.2	1	0	0.222976	0.187591	Alternative Products		FALSE
3819543	3819745	HNRPM	4670	19p13.3-p13.2	1	0	0.243319	0.205448	Alternative Products		FALSE
3224650	3224806	DENND1A	57706	9q33.2	1	0	0.0130648	-0.238738			TRUE
3697015	3697019	AARS	16	16q22	1	0	-0.108545	-0.174557			TRUE
2963929	2963966	RNGTT	8732	6q16	1	0	0.257977	0.171016	Alternative Products		FALSE
2391647	2391652	SSU72	29101	1p36.33	1	0	-0.0696203	-0.129417			TRUE
3067080	3067144	COG5	10466	7q22-q31	1	0	0.150228	0.0312484			TRUE
3566304	3566310	EXOC5	10640	14q23.1	1	0	0.245293	0.185009			TRUE
2560122	2560131	GCS1	7841	2p13-p12	1	0	0.0772219	-0.0696263		Glucosidase I deficiency,	TRUE
4027302	4027313	DNASE1L1	1774	Xq28	1	0	0.242945	0.136554			TRUE
